# Supplementary material for: Effects of 1p/19q Codeletion on Immune Phenotype in Low Grade Glioma
Source: Front Cell Neurosci. 2021 Jul 16;15:704344. doi: 10.3389/fncel.2021.704344 (PMC8322528; doi:10.3389/fncel.2021.704344)
Supplement: Supplementary Table 1 — List of biological processes negatively associated with IDH mutation in LGG datasets. [file Table_1.XLSX]

## Sheet: Table S1
Table S1A
List of top 100 biological processes negatively associated with IDH mutation in TCGA LGG.
NAME	SIZE	ES	NES	NOM p-val	FDR q-val	FWER p-val
GO_B_CELL_MEDIATED_IMMUNITY	109	-0.649502	-2.03677	0	0.00199175	0.002
GO_INTERFERON_GAMMA_MEDIATED_SIGNALING_PATHWAY	87	-0.67072	-2.02726	0	0.00150006	0.003
GO_CILIUM_MOVEMENT	45	-0.728484	-1.99559	0	0.00167147	0.005
GO_ADAPTIVE_IMMUNE_RESPONSE_BASED_ON_SOMATIC_RECOMBINATION_OF_IMMUNE_RECEPTORS_BUILT_FROM_IMMUNOGLOBULIN_SUPERFAMILY_DOMAINS	246	-0.590353	-1.95633	0	0.00225498	0.009
GO_AXONEME_ASSEMBLY	42	-0.718215	-1.95073	0	0.00240484	0.012
GO_FIBRINOLYSIS	28	-0.758903	-1.94223	0	0.00250699	0.015
GO_LYMPHOCYTE_MEDIATED_IMMUNITY	237	-0.573149	-1.91008	0	0.00529536	0.037
GO_COLLAGEN_FIBRIL_ORGANIZATION	46	-0.695865	-1.9048	0	0.00576093	0.046
GO_ADAPTIVE_IMMUNE_RESPONSE	381	-0.559579	-1.90161	0	0.00601277	0.053
GO_INTERLEUKIN_8_SECRETION	26	-0.757594	-1.8998	0	0.00591312	0.058
GO_FAT_SOLUBLE_VITAMIN_METABOLIC_PROCESS	42	-0.705794	-1.89874	0	0.00546732	0.059
GO_CYTOKINE_METABOLIC_PROCESS	110	-0.617565	-1.88719	0	0.00709266	0.082
GO_LEUKOCYTE_MIGRATION	402	-0.547146	-1.8791	0	0.00778497	0.097
GO_MITOTIC_METAPHASE_PLATE_CONGRESSION	41	-0.686758	-1.87675	0	0.00765564	0.103
GO_AXONEMAL_DYNEIN_COMPLEX_ASSEMBLY	22	-0.783117	-1.87666	0	0.00714527	0.103
GO_EXTRACELLULAR_STRUCTURE_ORGANIZATION	400	-0.544506	-1.8669	0	0.0092597	0.138
GO_T_CELL_ACTIVATION_INVOLVED_IN_IMMUNE_RESPONSE	98	-0.616036	-1.86566	0	0.00889125	0.141
GO_NEGATIVE_REGULATION_OF_VIRAL_GENOME_REPLICATION	52	-0.661644	-1.85706	0	0.0111223	0.183
GO_LYMPHOCYTE_ACTIVATION_INVOLVED_IN_IMMUNE_RESPONSE	169	-0.574765	-1.85681	0	0.0105369	0.183
GO_RESPONSE_TO_TYPE_I_INTERFERON	93	-0.609889	-1.8544	0	0.0105582	0.191
GO_DIVALENT_INORGANIC_ANION_HOMEOSTASIS	13	-0.863758	-1.85279	0	0.0103402	0.196
GO_METAPHASE_ANAPHASE_TRANSITION_OF_CELL_CYCLE	54	-0.654302	-1.85247	0	0.00996066	0.198
GO_ALPHA_BETA_T_CELL_PROLIFERATION	31	-0.722881	-1.84905	0	0.0103519	0.214
GO_INTERLEUKIN_6_SECRETION	36	-0.696516	-1.84715	0.00141044	0.0104194	0.225
GO_HUMORAL_IMMUNE_RESPONSE_MEDIATED_BY_CIRCULATING_IMMUNOGLOBULIN	45	-0.659012	-1.84054	0	0.0118845	0.261
GO_METAPHASE_PLATE_CONGRESSION	51	-0.655193	-1.83784	0	0.0122323	0.276
GO_PLASMINOGEN_ACTIVATION	22	-0.766839	-1.83774	0	0.0117793	0.276
GO_MICROTUBULE_BUNDLE_FORMATION	67	-0.629597	-1.83295	0	0.0129351	0.311
GO_INTERLEUKIN_8_PRODUCTION	69	-0.63031	-1.83135	0	0.0131451	0.325
GO_T_CELL_SELECTION	48	-0.660868	-1.8292	0	0.0134412	0.339
GO_DENDRITIC_CELL_MIGRATION	27	-0.730199	-1.82892	0	0.0131362	0.342
GO_RESPONSE_TO_INTERFERON_GAMMA	192	-0.557412	-1.8281	0	0.0129135	0.346
GO_ACUTE_INFLAMMATORY_RESPONSE	106	-0.589673	-1.82786	0	0.0125524	0.347
GO_MITOTIC_SISTER_CHROMATID_SEGREGATION	137	-0.574444	-1.82729	0	0.0123902	0.353
GO_THYMIC_T_CELL_SELECTION	21	-0.774657	-1.82495	0	0.0129514	0.373
GO_TISSUE_REMODELING	152	-0.568912	-1.81903	0	0.0146504	0.418
GO_T_CELL_PROLIFERATION	174	-0.556169	-1.81822	0	0.0145517	0.423
GO_NEGATIVE_REGULATION_OF_IMMUNE_RESPONSE	136	-0.574969	-1.81776	0	0.0142737	0.425
GO_REGULATION_OF_LEUKOCYTE_PROLIFERATION	211	-0.550809	-1.8176	0	0.0140106	0.426
GO_NEGATIVE_REGULATION_OF_COAGULATION	53	-0.641136	-1.81542	0.00134228	0.0143591	0.446
GO_REGULATION_OF_PRODUCTION_OF_MOLECULAR_MEDIATOR_OF_IMMUNE_RESPONSE	135	-0.574861	-1.81363	0	0.0143743	0.452
GO_NEGATIVE_REGULATION_OF_IMMUNE_EFFECTOR_PROCESS	115	-0.578048	-1.80225	0	0.0181321	0.544
GO_NEGATIVE_REGULATION_OF_CYTOKINE_SECRETION	57	-0.632651	-1.80157	0	0.0178959	0.549
GO_T_CELL_ACTIVATION	443	-0.526098	-1.79881	0	0.018514	0.567
GO_LEUKOCYTE_PROLIFERATION	281	-0.535861	-1.79827	0	0.0182811	0.57
GO_CELLULAR_RESPONSE_TO_VITAMIN	30	-0.697977	-1.79566	0	0.0190377	0.599
GO_POSITIVE_REGULATION_OF_LEUKOCYTE_DIFFERENTIATION	137	-0.565797	-1.79235	0	0.01991	0.627
GO_CHROMOSOME_LOCALIZATION	66	-0.612558	-1.7913	0	0.0199759	0.636
GO_REGULATION_OF_IMMUNE_EFFECTOR_PROCESS	374	-0.528255	-1.78858	0	0.0207307	0.652
GO_POSITIVE_REGULATION_OF_IMMUNOGLOBULIN_PRODUCTION	39	-0.669555	-1.78792	0	0.0205167	0.655
GO_RESPONSE_TO_COPPER_ION	40	-0.665118	-1.78769	0	0.0202524	0.658
GO_PRODUCTION_OF_MOLECULAR_MEDIATOR_OF_IMMUNE_RESPONSE	184	-0.547062	-1.78671	0	0.0201521	0.663
GO_T_CELL_DIFFERENTIATION	227	-0.53746	-1.78435	0	0.0206586	0.677
GO_T_CELL_MIGRATION	58	-0.62715	-1.78429	0	0.0202945	0.678
GO_REGULATION_OF_ADAPTIVE_IMMUNE_RESPONSE	155	-0.551705	-1.78405	0	0.0201072	0.685
GO_REGULATION_OF_ALPHA_BETA_T_CELL_ACTIVATION	90	-0.587877	-1.78404	0	0.0197481	0.685
GO_REGULATION_OF_CYTOKINE_PRODUCTION_INVOLVED_IN_IMMUNE_RESPONSE	83	-0.594092	-1.78345	0	0.0196471	0.69
GO_ENDODERM_FORMATION	50	-0.640518	-1.78207	0	0.0198263	0.697
GO_PROTEIN_TRIMERIZATION	51	-0.636336	-1.7809	0	0.0200508	0.707
GO_NEGATIVE_REGULATION_OF_CELL_ACTIVATION	178	-0.541189	-1.7801	0	0.0200838	0.711
GO_NEGATIVE_REGULATION_OF_LYMPHOCYTE_ACTIVATION	136	-0.56791	-1.77992	0	0.0198035	0.712
GO_IMMUNOGLOBULIN_PRODUCTION	94	-0.58385	-1.77988	0	0.0195165	0.713
GO_POSITIVE_REGULATION_OF_PRODUCTION_OF_MOLECULAR_MEDIATOR_OF_IMMUNE_RESPONSE	91	-0.581076	-1.77959	0	0.0193501	0.713
GO_REGULATION_OF_CHROMOSOME_SEPARATION	60	-0.616411	-1.77712	0	0.0199071	0.73
GO_POSITIVE_REGULATION_OF_LEUKOCYTE_CELL_CELL_ADHESION	209	-0.543095	-1.77655	0	0.0198473	0.733
GO_POSITIVE_REGULATION_OF_FIBROBLAST_PROLIFERATION	49	-0.636812	-1.7746	0	0.0204583	0.744
GO_NEGATIVE_REGULATION_OF_PEPTIDASE_ACTIVITY	237	-0.531116	-1.7737	0	0.0204671	0.746
GO_ALPHA_BETA_T_CELL_ACTIVATION	133	-0.554551	-1.77032	0	0.0216974	0.771
GO_POSITIVE_REGULATION_OF_B_CELL_MEDIATED_IMMUNITY	34	-0.676153	-1.76931	0.00138504	0.0220654	0.78
GO_REGULATION_OF_LYMPHOCYTE_MEDIATED_IMMUNITY	145	-0.556261	-1.7689	0	0.0218935	0.785
GO_GRANULOCYTE_MIGRATION	124	-0.569208	-1.76858	0	0.0217266	0.788
GO_COLLAGEN_ACTIVATED_SIGNALING_PATHWAY	13	-0.806283	-1.76855	0	0.0214248	0.788
GO_T_CELL_MEDIATED_IMMUNITY	102	-0.577971	-1.76828	0	0.0212275	0.79
GO_RENAL_SYSTEM_PROCESS_INVOLVED_IN_REGULATION_OF_SYSTEMIC_ARTERIAL_BLOOD_PRESSURE	23	-0.729536	-1.76723	0	0.0213865	0.797
GO_REGULATION_OF_PLASMINOGEN_ACTIVATION	12	-0.829819	-1.7658	0	0.0217289	0.809
GO_REGULATION_OF_T_CELL_ACTIVATION	300	-0.523952	-1.76555	0	0.021522	0.811
GO_REGULATION_OF_COAGULATION	78	-0.589639	-1.76525	0	0.0214249	0.813
GO_B_CELL_PROLIFERATION	91	-0.578831	-1.76313	0	0.0220759	0.823
GO_POSITIVE_REGULATION_OF_CELL_CELL_ADHESION	241	-0.526813	-1.76199	0	0.0223038	0.832
GO_REGULATION_OF_VASCULATURE_DEVELOPMENT	292	-0.522199	-1.76194	0	0.0220375	0.832
GO_NEUTROPHIL_MIGRATION	103	-0.571204	-1.76114	0	0.0220259	0.835
GO_LEUKOCYTE_CELL_CELL_ADHESION	316	-0.519151	-1.76059	0	0.0220504	0.839
GO_CILIUM_OR_FLAGELLUM_DEPENDENT_CELL_MOTILITY	26	-0.708689	-1.75943	0.00143266	0.0222437	0.846
GO_NEGATIVE_REGULATION_OF_LEUKOCYTE_CELL_CELL_ADHESION	112	-0.57125	-1.7593	0	0.0220383	0.846
GO_POSITIVE_REGULATION_OF_T_CELL_PROLIFERATION	92	-0.579035	-1.75701	0	0.0228044	0.859
GO_REGULATION_OF_B_CELL_ACTIVATION	113	-0.56665	-1.75587	0	0.0229824	0.864
GO_NEGATIVE_REGULATION_OF_LEUKOCYTE_MEDIATED_IMMUNITY	49	-0.628672	-1.7535	0.00132626	0.0237315	0.878
GO_REGULATION_OF_FIBRINOLYSIS	14	-0.795058	-1.75335	0.0015674	0.0235188	0.879
GO_TOLERANCE_INDUCTION	25	-0.700254	-1.7515	0.00287356	0.0239636	0.885
GO_NEGATIVE_REGULATION_OF_CYTOKINE_PRODUCTION	245	-0.52608	-1.75147	0	0.0236973	0.885
GO_POSITIVE_REGULATION_OF_HEMOPOIESIS	172	-0.541142	-1.75072	0	0.0238435	0.894
GO_ZYMOGEN_ACTIVATION	49	-0.631075	-1.74992	0	0.0239872	0.899
GO_POSITIVE_T_CELL_SELECTION	35	-0.666867	-1.74857	0	0.0243754	0.906
GO_REGULATION_OF_LYMPHOCYTE_ACTIVATION	398	-0.513851	-1.74625	0	0.0253094	0.913
GO_CATECHOLAMINE_BIOSYNTHETIC_PROCESS	20	-0.726524	-1.7461	0	0.0251382	0.914
GO_MODULATION_OF_MOLECULAR_FUNCTION_IN_OTHER_ORGANISM	10	-0.850552	-1.7457	0	0.0250336	0.914
GO_NAD_BIOSYNTHETIC_PROCESS	25	-0.710846	-1.74461	0.00144092	0.0253124	0.918
GO_POSITIVE_REGULATION_OF_LEUKOCYTE_PROLIFERATION	132	-0.551699	-1.74439	0	0.0251154	0.918
GO_POSITIVE_REGULATION_OF_LYMPHOCYTE_ACTIVATION	256	-0.526688	-1.74428	0	0.0249427	0.918
GO_POSITIVE_REGULATION_OF_CELL_ACTIVATION	307	-0.518621	-1.74374	0	0.0249536	0.918
Table S1B
List of top 100 biological processes negatively associated with IDH mutation in CGGA325 LGG.
NAME	SIZE	ES	NES	NOM p-val	FDR q-val	FWER p-val
GO_ADAPTIVE_IMMUNE_RESPONSE_BASED_ON_SOMATIC_RECOMBINATION_OF_IMMUNE_RECEPTORS_BUILT_FROM_IMMUNOGLOBULIN_SUPERFAMILY_DOMAINS	260	-0.638418	-2.60276	0	0	0
GO_B_CELL_MEDIATED_IMMUNITY	133	-0.675761	-2.59099	0	0	0
GO_ADAPTIVE_IMMUNE_RESPONSE	377	-0.602778	-2.52492	0	0	0
GO_LYMPHOCYTE_MEDIATED_IMMUNITY	248	-0.615576	-2.47948	0	0	0
GO_HUMORAL_IMMUNE_RESPONSE	195	-0.615427	-2.45273	0	0	0
GO_HUMORAL_IMMUNE_RESPONSE_MEDIATED_BY_CIRCULATING_IMMUNOGLOBULIN	74	-0.704183	-2.44576	0	0	0
GO_ACUTE_INFLAMMATORY_RESPONSE	91	-0.676153	-2.39725	0	0	0
GO_CYTOKINE_METABOLIC_PROCESS	99	-0.654766	-2.39127	0	0	0
GO_LEUKOCYTE_MIGRATION	400	-0.567074	-2.38953	0	0	0
GO_REGULATION_OF_HUMORAL_IMMUNE_RESPONSE	80	-0.668068	-2.35139	0	0	0
GO_RESPONSE_TO_INTERFERON_GAMMA	178	-0.595472	-2.33741	0	0	0
GO_POSITIVE_REGULATION_OF_CELL_ACTIVATION	317	-0.565952	-2.32964	0	0	0
GO_REGULATION_OF_IMMUNE_EFFECTOR_PROCESS	370	-0.55615	-2.32766	0	0	0
GO_PRODUCTION_OF_MOLECULAR_MEDIATOR_OF_IMMUNE_RESPONSE	192	-0.589385	-2.32662	0	0	0
GO_POSITIVE_REGULATION_OF_LYMPHOCYTE_ACTIVATION	266	-0.571839	-2.32562	0	0	0
GO_NEUTROPHIL_MIGRATION	91	-0.65077	-2.31613	0	0	0
GO_GRANULOCYTE_MIGRATION	110	-0.629141	-2.30604	0	0	0
GO_REGULATION_OF_PRODUCTION_OF_MOLECULAR_MEDIATOR_OF_IMMUNE_RESPONSE	128	-0.604319	-2.30599	0	0	0
GO_ACUTE_PHASE_RESPONSE	33	-0.732797	-2.30169	0	0	0
GO_T_CELL_ACTIVATION	412	-0.541123	-2.28922	0	0	0
GO_REGULATION_OF_LEUKOCYTE_PROLIFERATION	197	-0.578045	-2.28633	0	0	0
GO_REGULATION_OF_LYMPHOCYTE_ACTIVATION	399	-0.540668	-2.28532	0	0	0
GO_LEUKOCYTE_PROLIFERATION	250	-0.562904	-2.28506	0	0	0
GO_REGULATION_OF_ADAPTIVE_IMMUNE_RESPONSE	143	-0.593087	-2.27852	0	0	0
GO_ALPHA_BETA_T_CELL_ACTIVATION	125	-0.605415	-2.27519	0	0	0
GO_REGULATION_OF_B_CELL_ACTIVATION	128	-0.598835	-2.27339	0	0	0
GO_T_CELL_MEDIATED_IMMUNITY	92	-0.628048	-2.2714	0	0	0
GO_T_CELL_PROLIFERATION	164	-0.576657	-2.26931	0	0	0
GO_RESPONSE_TO_BACTERIUM	494	-0.533634	-2.26219	0	0	0
GO_POSITIVE_REGULATION_OF_T_CELL_PROLIFERATION	84	-0.628796	-2.26207	0	0	0
GO_DEFENSE_RESPONSE_TO_BACTERIUM	174	-0.573622	-2.26146	0	0	0
GO_POSITIVE_REGULATION_OF_LEUKOCYTE_CELL_CELL_ADHESION	201	-0.569298	-2.25932	0	0	0
GO_T_CELL_ACTIVATION_INVOLVED_IN_IMMUNE_RESPONSE	78	-0.640059	-2.25588	0	0	0
GO_DEFENSE_RESPONSE_TO_OTHER_ORGANISM	379	-0.536512	-2.25557	0	0	0
GO_MYELOID_LEUKOCYTE_MIGRATION	170	-0.580022	-2.2536	0	0	0
GO_B_CELL_RECEPTOR_SIGNALING_PATHWAY	75	-0.640161	-2.25353	0	0	0
GO_T_CELL_MIGRATION	55	-0.680953	-2.24998	0	0	0
GO_LEUKOCYTE_CELL_CELL_ADHESION	301	-0.538988	-2.24017	0	0	0
GO_POSITIVE_REGULATION_OF_CELL_CELL_ADHESION	230	-0.552007	-2.23188	0	0	0
GO_INTERLEUKIN_8_PRODUCTION	63	-0.654799	-2.2298	0	0	0
GO_INTERFERON_GAMMA_MEDIATED_SIGNALING_PATHWAY	84	-0.625562	-2.22272	0	0	0
GO_CILIUM_MOVEMENT	48	-0.678537	-2.21505	0	0	0
GO_CD4_POSITIVE_ALPHA_BETA_T_CELL_ACTIVATION	79	-0.627787	-2.21099	0	0	0
GO_ANTIGEN_RECEPTOR_MEDIATED_SIGNALING_PATHWAY	243	-0.543349	-2.21069	0	0	0
GO_ALPHA_BETA_T_CELL_DIFFERENTIATION	94	-0.600885	-2.2101	0	0	0
GO_REGULATION_OF_LYMPHOCYTE_MEDIATED_IMMUNITY	130	-0.58157	-2.2087	0	0	0
GO_LEUKOCYTE_DIFFERENTIATION	453	-0.522083	-2.20626	0	0	0
GO_POSITIVE_REGULATION_OF_LEUKOCYTE_PROLIFERATION	121	-0.584114	-2.20524	0	0	0
GO_CELL_CHEMOTAXIS	253	-0.541394	-2.19992	0	0	0
GO_COMPLEMENT_ACTIVATION	84	-0.619447	-2.19741	0	0	0
GO_POSITIVE_REGULATION_OF_LEUKOCYTE_DIFFERENTIATION	132	-0.576596	-2.1967	0	0	0
GO_REGULATION_OF_T_CELL_ACTIVATION	286	-0.537113	-2.19582	0	0	0
GO_LEUKOCYTE_CHEMOTAXIS	187	-0.557274	-2.19526	0	0	0
GO_IMMUNOGLOBULIN_PRODUCTION	108	-0.59353	-2.19502	0	0	0
GO_T_CELL_DIFFERENTIATION	217	-0.545748	-2.19404	0	0	0
GO_ANTIMICROBIAL_HUMORAL_RESPONSE	69	-0.626851	-2.19104	0	0	0
GO_POSITIVE_REGULATION_OF_RESPONSE_TO_EXTERNAL_STIMULUS	273	-0.531842	-2.17853	0	0	0
GO_LYMPHOCYTE_ACTIVATION_INVOLVED_IN_IMMUNE_RESPONSE	142	-0.571819	-2.17713	0	0	0
GO_POSITIVE_REGULATION_OF_PRODUCTION_OF_MOLECULAR_MEDIATOR_OF_IMMUNE_RESPONSE	88	-0.602888	-2.17692	0	0	0
GO_NEGATIVE_REGULATION_OF_LYMPHOCYTE_ACTIVATION	126	-0.573208	-2.17535	0	0	0
GO_POSITIVE_REGULATION_OF_B_CELL_ACTIVATION	86	-0.605238	-2.1742	0	0	0
GO_RESPONSE_TO_MOLECULE_OF_BACTERIAL_ORIGIN	296	-0.523512	-2.16719	0	0	0
GO_NEGATIVE_REGULATION_OF_CELL_ACTIVATION	168	-0.554122	-2.16373	0	0	0
GO_T_CELL_SELECTION	45	-0.674718	-2.16302	0	0	0
GO_INTERLEUKIN_8_SECRETION	25	-0.744119	-2.15751	0	0	0
GO_NEGATIVE_REGULATION_OF_CYTOKINE_PRODUCTION	229	-0.5343	-2.15553	0	0	0
GO_REGULATION_OF_LEUKOCYTE_DIFFERENTIATION	242	-0.527736	-2.15405	0	0	0
GO_CYTOKINE_PRODUCTION_INVOLVED_IN_IMMUNE_RESPONSE	93	-0.589745	-2.15297	0	0	0
GO_REGULATION_OF_CYTOKINE_PRODUCTION_INVOLVED_IN_IMMUNE_RESPONSE	79	-0.612744	-2.15232	0	0	0
GO_MONOCYTE_CHEMOTAXIS	49	-0.65865	-2.15028	0	1.53095e-05	0.001
GO_POSITIVE_REGULATION_OF_LEUKOCYTE_MIGRATION	113	-0.574385	-2.14848	0	1.50938e-05	0.001
GO_B_CELL_ACTIVATION	226	-0.530478	-2.14536	0	1.48842e-05	0.001
GO_REGULATION_OF_ALPHA_BETA_T_CELL_ACTIVATION	85	-0.601781	-2.14468	0	1.46803e-05	0.001
GO_NEGATIVE_REGULATION_OF_LEUKOCYTE_CELL_CELL_ADHESION	108	-0.580659	-2.14272	0	1.44819e-05	0.001
GO_TISSUE_REMODELING	137	-0.561049	-2.14125	0	1.42888e-05	0.001
GO_REGULATION_OF_LEUKOCYTE_MIGRATION	173	-0.548141	-2.13823	0	1.41008e-05	0.001
GO_NEGATIVE_REGULATION_OF_IMMUNE_RESPONSE	123	-0.569302	-2.13443	0	1.39177e-05	0.001
GO_POSITIVE_REGULATION_OF_MYELOID_LEUKOCYTE_DIFFERENTIATION	47	-0.65091	-2.12874	0	2.74996e-05	0.002
GO_MYELOID_LEUKOCYTE_DIFFERENTIATION	184	-0.540023	-2.12667	0	2.71515e-05	0.002
GO_REGULATION_OF_CELL_CELL_ADHESION	350	-0.511088	-2.12597	0	2.68121e-05	0.002
GO_REGULATION_OF_LEUKOCYTE_MEDIATED_IMMUNITY	179	-0.539916	-2.12495	0	2.64811e-05	0.002
GO_T_CELL_DIFFERENTIATION_INVOLVED_IN_IMMUNE_RESPONSE	60	-0.62834	-2.12131	0	2.61581e-05	0.002
GO_POSITIVE_REGULATION_OF_HEMOPOIESIS	167	-0.541126	-2.11483	0	5.17713e-05	0.004
GO_POSITIVE_REGULATION_OF_ACUTE_INFLAMMATORY_RESPONSE	28	-0.741518	-2.11192	0	5.11549e-05	0.004
GO_NEGATIVE_REGULATION_OF_IMMUNE_EFFECTOR_PROCESS	105	-0.572326	-2.10552	0	6.29683e-05	0.005
GO_FAT_SOLUBLE_VITAMIN_METABOLIC_PROCESS	38	-0.673013	-2.1042	0	6.22362e-05	0.005
GO_CELL_KILLING	115	-0.569286	-2.10357	0	6.15208e-05	0.005
GO_FIBRINOLYSIS	19	-0.786826	-2.10138	0	6.08217e-05	0.005
GO_LYMPHOCYTE_MIGRATION	91	-0.583684	-2.10122	0	6.01383e-05	0.005
GO_REGULATION_OF_ACUTE_INFLAMMATORY_RESPONSE	40	-0.669678	-2.10108	0	5.94701e-05	0.005
GO_NEGATIVE_REGULATION_OF_COAGULATION	44	-0.663882	-2.10003	0	5.88166e-05	0.005
GO_COLLAGEN_FIBRIL_ORGANIZATION	50	-0.643163	-2.09779	0	6.97424e-05	0.006
GO_LEUKOCYTE_MEDIATED_CYTOTOXICITY	93	-0.578924	-2.09385	0	6.89925e-05	0.006
GO_NEGATIVE_REGULATION_OF_CYTOKINE_SECRETION	54	-0.62268	-2.08864	0	7.96967e-05	0.007
GO_PHAGOCYTOSIS	266	-0.507516	-2.08671	0	9.00117e-05	0.008
GO_IMMUNE_RESPONSE_REGULATING_CELL_SURFACE_RECEPTOR_SIGNALING_PATHWAY	390	-0.498683	-2.08636	0	0.000100343	0.009
GO_POSITIVE_REGULATION_OF_CHEMOTAXIS	122	-0.551634	-2.08628	0	9.93086e-05	0.009
GO_TYPE_2_IMMUNE_RESPONSE	32	-0.690577	-2.08458	0	9.82953e-05	0.009
GO_POSITIVE_REGULATION_OF_INFLAMMATORY_RESPONSE	126	-0.549446	-2.08301	0	0.000108073	0.01
GO_CELLULAR_RESPONSE_TO_VITAMIN	28	-0.712458	-2.08275	0	0.000106992	0.01
Table S1C
List of top 100 biological processes negatively associated with IDH mutation in CGGA693 LGG.
NAME	SIZE	ES	NES	NOM p-val	FDR q-val	FWER p-val
GO_B_CELL_MEDIATED_IMMUNITY	114	-0.635631	-2.18076	0	0	0
GO_HUMORAL_IMMUNE_RESPONSE_MEDIATED_BY_CIRCULATING_IMMUNOGLOBULIN	55	-0.693751	-2.1217	0	0.000469983	0.001
GO_PHAGOCYTOSIS_RECOGNITION	28	-0.7486	-2.11642	0	0.000313322	0.001
GO_COLLAGEN_FIBRIL_ORGANIZATION	50	-0.688085	-2.10034	0	0.000234991	0.001
GO_B_CELL_RECEPTOR_SIGNALING_PATHWAY	70	-0.647872	-2.07778	0	0.000187993	0.001
GO_ADAPTIVE_IMMUNE_RESPONSE_BASED_ON_SOMATIC_RECOMBINATION_OF_IMMUNE_RECEPTORS_BUILT_FROM_IMMUNOGLOBULIN_SUPERFAMILY_DOMAINS	240	-0.57183	-2.06537	0	0.000312935	0.002
GO_CILIUM_MOVEMENT	48	-0.670097	-2.04794	0	0.000670766	0.005
GO_LYMPHOCYTE_MEDIATED_IMMUNITY	228	-0.557432	-2.01369	0	0.0016382	0.014
GO_ADAPTIVE_IMMUNE_RESPONSE	353	-0.546564	-2.00674	0	0.00176824	0.017
GO_HUMORAL_IMMUNE_RESPONSE	178	-0.554544	-1.98192	0	0.00290361	0.03
GO_COMPLEMENT_ACTIVATION	67	-0.618523	-1.97654	0	0.0028958	0.033
GO_REGULATION_OF_HUMORAL_IMMUNE_RESPONSE	63	-0.630457	-1.97379	0	0.00265448	0.033
GO_CARTILAGE_DEVELOPMENT_INVOLVED_IN_ENDOCHONDRAL_BONE_MORPHOGENESIS	44	-0.656117	-1.96255	0	0.00353009	0.047
GO_PLASMINOGEN_ACTIVATION	17	-0.783	-1.96229	0	0.00327794	0.047
GO_REGULATION_OF_B_CELL_ACTIVATION	124	-0.566622	-1.94338	0	0.00524641	0.077
GO_POSITIVE_REGULATION_OF_B_CELL_ACTIVATION	81	-0.589959	-1.93554	0	0.00544754	0.085
GO_NEGATIVE_REGULATION_OF_COAGULATION	46	-0.637185	-1.92878	0	0.00617933	0.1
GO_ACUTE_INFLAMMATORY_RESPONSE	91	-0.582195	-1.91457	0	0.0077119	0.132
GO_DIVALENT_INORGANIC_ANION_HOMEOSTASIS	9	-0.883795	-1.91334	0	0.00745386	0.135
GO_INTERFERON_GAMMA_MEDIATED_SIGNALING_PATHWAY	81	-0.579764	-1.8943	0	0.0114357	0.215
GO_T_CELL_ACTIVATION_INVOLVED_IN_IMMUNE_RESPONSE	77	-0.585406	-1.89197	0	0.0116516	0.229
GO_CORNIFICATION	47	-0.619583	-1.88907	0	0.0118468	0.241
GO_REGULATION_OF_ANTIGEN_PROCESSING_AND_PRESENTATION	18	-0.752398	-1.88627	0	0.0123908	0.263
GO_ACUTE_PHASE_RESPONSE	35	-0.643832	-1.88544	0	0.0120699	0.266
GO_GROWTH_PLATE_CARTILAGE_DEVELOPMENT	33	-0.665343	-1.88232	0	0.0124489	0.285
GO_EXTRACELLULAR_STRUCTURE_ORGANIZATION	376	-0.509651	-1.8766	0	0.0132342	0.308
GO_KERATINIZATION	63	-0.593929	-1.87211	0	0.0142052	0.338
GO_T_CELL_SELECTION	45	-0.620156	-1.86583	0	0.015569	0.375
GO_REGULATION_OF_ALPHA_BETA_T_CELL_ACTIVATION	85	-0.565544	-1.86426	0	0.0153865	0.377
GO_SPONGIOTROPHOBLAST_LAYER_DEVELOPMENT	12	-0.803558	-1.86284	0	0.0153738	0.386
GO_NEGATIVE_REGULATION_OF_PEPTIDASE_ACTIVITY	187	-0.528754	-1.85808	0	0.0161781	0.41
GO_ZYMOGEN_ACTIVATION	40	-0.632577	-1.85443	0	0.0168737	0.434
GO_B_CELL_ACTIVATION	220	-0.517749	-1.85373	0	0.016648	0.441
GO_LEUKOCYTE_MIGRATION	384	-0.505272	-1.85045	0	0.0175921	0.472
GO_REGULATION_OF_COAGULATION	71	-0.578082	-1.84742	0	0.0180792	0.489
GO_CYTOKINE_METABOLIC_PROCESS	98	-0.552563	-1.84724	0	0.0177586	0.494
GO_POSITIVE_REGULATION_OF_LYMPHOCYTE_ACTIVATION	260	-0.511383	-1.84561	0	0.0176835	0.503
GO_CELL_DIFFERENTIATION_INVOLVED_IN_EMBRYONIC_PLACENTA_DEVELOPMENT	24	-0.688245	-1.8419	0.00137741	0.0185739	0.531
GO_THYROID_GLAND_DEVELOPMENT	24	-0.69631	-1.84097	0.00130039	0.0185303	0.538
GO_ALPHA_BETA_T_CELL_ACTIVATION	125	-0.539571	-1.83681	0	0.0197089	0.569
GO_DEFENSE_RESPONSE_TO_BACTERIUM	168	-0.521926	-1.83537	0	0.0197546	0.576
GO_FIBRINOLYSIS	21	-0.714463	-1.83523	0	0.0193737	0.577
GO_T_CELL_DIFFERENTIATION	217	-0.511662	-1.83433	0	0.0192289	0.586
GO_FAT_SOLUBLE_VITAMIN_METABOLIC_PROCESS	38	-0.634492	-1.83152	0	0.0201557	0.61
GO_T_CELL_MEDIATED_IMMUNITY	90	-0.55821	-1.83126	0	0.0197704	0.612
GO_POSITIVE_REGULATION_OF_LEUKOCYTE_DIFFERENTIATION	131	-0.531704	-1.83098	0	0.0194224	0.614
GO_BONE_GROWTH	44	-0.610788	-1.83026	0	0.0194475	0.622
GO_EPITHELIAL_CILIUM_MOVEMENT	21	-0.71072	-1.83003	0	0.0191203	0.622
GO_EPITHELIAL_CELL_MATURATION	14	-0.774153	-1.82988	0	0.0187877	0.623
GO_T_CELL_DIFFERENTIATION_INVOLVED_IN_IMMUNE_RESPONSE	59	-0.57632	-1.82809	0	0.0190682	0.64
GO_THYMIC_T_CELL_SELECTION	20	-0.710182	-1.82259	0.00275103	0.0211766	0.686
GO_REGULATION_OF_IMMUNE_EFFECTOR_PROCESS	353	-0.496415	-1.81863	0	0.022554	0.719
GO_AXONEME_ASSEMBLY	44	-0.60488	-1.81825	0	0.022323	0.722
GO_INTERLEUKIN_8_SECRETION	26	-0.667836	-1.815	0	0.0234028	0.747
GO_LYMPHOCYTE_ACTIVATION_INVOLVED_IN_IMMUNE_RESPONSE	142	-0.527439	-1.81404	0	0.0234709	0.753
GO_ENDOCHONDRAL_BONE_MORPHOGENESIS	68	-0.568444	-1.8095	0	0.0251804	0.783
GO_NEGATIVE_REGULATION_OF_IMMUNE_RESPONSE	121	-0.528434	-1.80924	0	0.0248206	0.783
GO_PRODUCTION_OF_MOLECULAR_MEDIATOR_OF_IMMUNE_RESPONSE	175	-0.511567	-1.80878	0	0.0246666	0.79
GO_RESPONSE_TO_TYPE_I_INTERFERON	77	-0.55577	-1.80707	0	0.0249812	0.795
GO_TISSUE_REMODELING	138	-0.51858	-1.80657	0	0.0246271	0.795
GO_POSITIVE_REGULATION_OF_LYMPHOCYTE_DIFFERENTIATION	85	-0.544528	-1.80617	0	0.0243158	0.797
GO_GROWTH_PLATE_CARTILAGE_CHONDROCYTE_DIFFERENTIATION	23	-0.671836	-1.80272	0	0.0252693	0.815
GO_REGULATION_OF_PLASMINOGEN_ACTIVATION	12	-0.799376	-1.79713	0	0.0276934	0.845
GO_POSITIVE_REGULATION_OF_CELL_ACTIVATION	309	-0.497334	-1.79703	0	0.0273047	0.845
GO_POSITIVE_REGULATION_OF_ALPHA_BETA_T_CELL_ACTIVATION	58	-0.572983	-1.79372	0.00122249	0.0285297	0.87
GO_REGULATION_OF_LEUKOCYTE_DIFFERENTIATION	242	-0.493037	-1.79253	0	0.0288076	0.873
GO_CILIUM_OR_FLAGELLUM_DEPENDENT_CELL_MOTILITY	29	-0.65237	-1.79115	0	0.0291319	0.878
GO_AXONEMAL_DYNEIN_COMPLEX_ASSEMBLY	25	-0.668218	-1.78931	0	0.0297662	0.884
GO_RESPIRATORY_BURST	31	-0.644227	-1.78756	0	0.0304083	0.893
GO_ACUTE_INFLAMMATORY_RESPONSE_TO_ANTIGENIC_STIMULUS	19	-0.688755	-1.78531	0	0.0313397	0.897
GO_REGULATION_OF_CILIUM_MOVEMENT	13	-0.764421	-1.78504	0.00144718	0.0311102	0.898
GO_CARTILAGE_MORPHOGENESIS	27	-0.64835	-1.783	0.00130548	0.0319033	0.901
GO_ENDODERM_DEVELOPMENT	68	-0.559814	-1.7821	0	0.0319418	0.905
GO_POSITIVE_REGULATION_OF_RECEPTOR_BINDING	10	-0.80316	-1.77776	0.00301205	0.0342604	0.923
GO_GRANULOCYTE_MIGRATION	110	-0.528824	-1.7774	0	0.0340164	0.923
GO_DEFENSE_RESPONSE_TO_OTHER_ORGANISM	371	-0.483422	-1.776	0	0.0344329	0.928
GO_RESPONSE_TO_BACTERIUM	486	-0.478888	-1.77586	0	0.034059	0.928
GO_ALPHA_BETA_T_CELL_PROLIFERATION	30	-0.628929	-1.77324	0	0.0355227	0.941
GO_LEUKOCYTE_DIFFERENTIATION	452	-0.481745	-1.77267	0	0.0354174	0.943
GO_REGULATION_OF_RESPONSE_TO_CYTOKINE_STIMULUS	151	-0.510995	-1.7687	0	0.0377277	0.954
GO_ENDODERM_FORMATION	47	-0.600906	-1.76832	0	0.037447	0.954
GO_NEGATIVE_REGULATION_OF_CYTOKINE_BIOSYNTHETIC_PROCESS	29	-0.636862	-1.76811	0.00130719	0.0371392	0.954
GO_GROWTH_PLATE_CARTILAGE_MORPHOGENESIS	18	-0.711122	-1.76746	0.00264901	0.0370756	0.955
GO_REGULATION_OF_PRODUCTION_OF_MOLECULAR_MEDIATOR_OF_IMMUNE_RESPONSE	127	-0.51425	-1.76636	0	0.0374934	0.959
GO_BEHAVIORAL_RESPONSE_TO_PAIN	13	-0.754551	-1.76574	0.00147493	0.0375593	0.959
GO_REGULATION_OF_LYMPHOCYTE_MEDIATED_IMMUNITY	130	-0.512723	-1.7634	0	0.0385073	0.966
GO_PHAGOCYTOSIS	249	-0.486719	-1.76062	0	0.0398435	0.972
GO_RESPONSE_TO_INTERFERON_GAMMA	175	-0.495163	-1.75913	0	0.0404241	0.976
GO_REGULATION_OF_LYMPHOCYTE_ACTIVATION	395	-0.482173	-1.75873	0	0.0402331	0.976
GO_COLLAGEN_CATABOLIC_PROCESS	37	-0.607521	-1.75765	0.00122699	0.0404731	0.978
GO_T_CELL_ACTIVATION	411	-0.478614	-1.7567	0	0.0405534	0.978
GO_POSITIVE_REGULATION_OF_HEMOPOIESIS	166	-0.498547	-1.75654	0	0.0402246	0.979
GO_T_CELL_MIGRATION	54	-0.57109	-1.75577	0	0.040277	0.98
GO_MEMBRANE_INVAGINATION	80	-0.531229	-1.7542	0	0.0409557	0.983
GO_REGULATION_OF_ADAPTIVE_IMMUNE_RESPONSE	143	-0.507514	-1.75133	0	0.0426772	0.986
GO_CELL_CELL_ADHESION_MEDIATED_BY_INTEGRIN	16	-0.714619	-1.74873	0.00268817	0.0442057	0.987
GO_NEUTROPHIL_MIGRATION	91	-0.527681	-1.74736	0	0.044687	0.987
GO_POSITIVE_REGULATION_OF_RESPONSE_TO_CYTOKINE_STIMULUS	52	-0.564689	-1.74656	0	0.0448621	0.988
GO_SPLEEN_DEVELOPMENT	31	-0.616607	-1.74542	0.00130548	0.0452136	0.989
GO_ALPHA_BETA_T_CELL_DIFFERENTIATION	94	-0.524595	-1.74471	0	0.0452676	0.99
Table S1D
List of top 10 common biological processes negatively associated with IDH mutation of all three LGG datasets.
NAME
GO_B_CELL_MEDIATED_IMMUNITY
GO_INTERFERON_GAMMA_MEDIATED_SIGNALING_PATHWAY
GO_CILIUM_MOVEMENT
GO_ADAPTIVE_IMMUNE_RESPONSE_BASED_ON_SOMATIC_RECOMBINATION_OF_IMMUNE_RECEPTORS_BUILT_FROM_IMMUNOGLOBULIN_SUPERFAMILY_DOMAINS
GO_LYMPHOCYTE_MEDIATED_IMMUNITY
GO_ADAPTIVE_IMMUNE_RESPONSE
GO_CYTOKINE_METABOLIC_PROCESS
GO_LEUKOCYTE_MIGRATION
GO_T_CELL_ACTIVATION_INVOLVED_IN_IMMUNE_RESPONSE
GO_HUMORAL_IMMUNE_RESPONSE_MEDIATED_BY_CIRCULATING_IMMUNOGLOBULIN
ES: Enrichment Score
NES: Normalized Enrichment Score
