# Supplementary material for: Effects of 1p/19q Codeletion on Immune Phenotype in Low Grade Glioma
Source: Front Cell Neurosci. 2021 Jul 16;15:704344. doi: 10.3389/fncel.2021.704344 (PMC8322528; doi:10.3389/fncel.2021.704344)
Supplement: Supplementary Table 2 — List of biological processes negatively associated with IDH mutation in 1p/19q non-codeletion LGGs of all three LGG datasets. [file Table_2.XLSX]

## Sheet: Table S2
Table S2A
List of top 100 biological processes negatively associated with IDH mutation in 1p/19q noncodel LGGs of TCGA LGG
NAME	SIZE	ES	NES	NOM p-val	FDR q-val	FWER p-val
GO_CILIUM_MOVEMENT	45	-0.768366	-2.0739	0	0	0
GO_AXONEME_ASSEMBLY	42	-0.730407	-1.92851	0	0.0111351	0.022
GO_COLLAGEN_FIBRIL_ORGANIZATION	46	-0.697072	-1.89158	0	0.019698	0.059
GO_MICROTUBULE_BUNDLE_FORMATION	67	-0.659328	-1.88525	0	0.017208	0.068
GO_MITOTIC_SISTER_CHROMATID_SEGREGATION	137	-0.602895	-1.87152	0	0.0192004	0.092
GO_MITOTIC_METAPHASE_PLATE_CONGRESSION	41	-0.703061	-1.86981	0	0.0169732	0.098
GO_FIBRINOLYSIS	28	-0.75283	-1.86149	0.00140252	0.018844	0.125
GO_CILIUM_OR_FLAGELLUM_DEPENDENT_CELL_MOTILITY	26	-0.749905	-1.85234	0	0.0208551	0.152
GO_AXONEMAL_DYNEIN_COMPLEX_ASSEMBLY	22	-0.780956	-1.82245	0	0.0407716	0.307
GO_EXTRACELLULAR_STRUCTURE_ORGANIZATION	400	-0.546792	-1.80912	0	0.0488269	0.391
GO_METAPHASE_PLATE_CONGRESSION	51	-0.652305	-1.78781	0	0.0738501	0.551
GO_RESPONSE_TO_COPPER_ION	40	-0.667375	-1.78491	0	0.0719836	0.58
GO_T_CELL_SELECTION	48	-0.65614	-1.78234	0	0.070175	0.599
GO_INTERLEUKIN_8_SECRETION	26	-0.731849	-1.78095	0	0.0670277	0.607
GO_DIVALENT_INORGANIC_ANION_HOMEOSTASIS	13	-0.832546	-1.77973	0	0.0638534	0.617
GO_PHOSPHATIDYLSERINE_ACYL_CHAIN_REMODELING	19	-0.75471	-1.77913	0	0.0608318	0.626
GO_EPITHELIAL_CELL_MATURATION	14	-0.827091	-1.76841	0	0.0723199	0.718
GO_METAPHASE_ANAPHASE_TRANSITION_OF_CELL_CYCLE	54	-0.64291	-1.76817	0	0.0685191	0.719
GO_POSITIVE_REGULATION_OF_SMOOTH_MUSCLE_CONTRACTION	29	-0.71037	-1.76441	0.00141443	0.069615	0.748
GO_CELL_CELL_ADHESION_MEDIATED_BY_INTEGRIN	15	-0.798863	-1.76368	0.00152672	0.0667151	0.749
GO_THYMIC_T_CELL_SELECTION	21	-0.760177	-1.75652	0.00147929	0.073703	0.798
GO_CELLULAR_RESPONSE_TO_COPPER_ION	27	-0.705189	-1.7544	0.00139276	0.0733969	0.81
GO_NEGATIVE_REGULATION_OF_COAGULATION	53	-0.636809	-1.74586	0	0.0843024	0.858
GO_B_CELL_MEDIATED_IMMUNITY	109	-0.577113	-1.73915	0	0.0930803	0.901
GO_SMOOTH_MUSCLE_CELL_MIGRATION	65	-0.607088	-1.73816	0	0.0912195	0.905
GO_CENTROMERE_COMPLEX_ASSEMBLY	45	-0.647813	-1.73667	0.00274348	0.0900644	0.908
GO_CELLULAR_RESPONSE_TO_VITAMIN	30	-0.699158	-1.7337	0	0.0922312	0.919
GO_PROTEIN_TRIMERIZATION	51	-0.634243	-1.73018	0	0.0965254	0.937
GO_SISTER_CHROMATID_SEGREGATION	167	-0.548929	-1.72666	0	0.0990248	0.947
GO_REGULATION_OF_CHROMOSOME_SEPARATION	60	-0.614004	-1.72491	0	0.0993768	0.951
GO_CHROMOSOME_LOCALIZATION	66	-0.605762	-1.72354	0	0.0985163	0.955
GO_CHROMATIN_REMODELING_AT_CENTROMERE	38	-0.654004	-1.71956	0.00271739	0.102865	0.96
GO_TISSUE_REMODELING	152	-0.549596	-1.71879	0	0.101011	0.963
GO_PLASMINOGEN_ACTIVATION	22	-0.73371	-1.71803	0.00289855	0.0992394	0.965
GO_COLLAGEN_BIOSYNTHETIC_PROCESS	38	-0.653571	-1.71793	0	0.096571	0.965
GO_FAT_SOLUBLE_VITAMIN_METABOLIC_PROCESS	42	-0.642947	-1.71749	0	0.0946972	0.968
GO_PHOSPHATIDYLETHANOLAMINE_ACYL_CHAIN_REMODELING	22	-0.722198	-1.71736	0	0.0923468	0.968
GO_NAD_BIOSYNTHETIC_PROCESS	25	-0.701442	-1.71543	0.00441826	0.0935417	0.974
GO_CATECHOLAMINE_BIOSYNTHETIC_PROCESS	20	-0.73811	-1.71392	0.00146413	0.0939553	0.979
GO_VITAMIN_D_METABOLIC_PROCESS	14	-0.802405	-1.71339	0	0.0927467	0.981
GO_SPONGIOTROPHOBLAST_LAYER_DEVELOPMENT	13	-0.813888	-1.70785	0	0.0999543	0.984
GO_INTERFERON_GAMMA_MEDIATED_SIGNALING_PATHWAY	87	-0.5769	-1.70179	0	0.108871	0.99
GO_OUTER_DYNEIN_ARM_ASSEMBLY	14	-0.794879	-1.70085	0.0015456	0.108234	0.99
GO_NEGATIVE_REGULATION_OF_KERATINOCYTE_PROLIFERATION	12	-0.807946	-1.69943	0.0015674	0.108576	0.99
GO_DEFENSE_RESPONSE_TO_FUNGUS	35	-0.658605	-1.69175	0.00275862	0.122851	0.992
GO_NEGATIVE_REGULATION_OF_VIRAL_GENOME_REPLICATION	52	-0.613585	-1.69035	0	0.123304	0.994
GO_CARTILAGE_DEVELOPMENT_INVOLVED_IN_ENDOCHONDRAL_BONE_MORPHOGENESIS	47	-0.619729	-1.68896	0.00133869	0.123571	0.995
GO_POSITIVE_REGULATION_OF_PROTEIN_AUTOPHOSPHORYLATION	25	-0.700642	-1.68261	0.00294118	0.136257	0.996
GO_EPITHELIAL_CILIUM_MOVEMENT	20	-0.729023	-1.68203	0	0.134903	0.996
GO_COLLAGEN_CATABOLIC_PROCESS	42	-0.636149	-1.6803	0.00401069	0.137078	0.997
GO_ZINC_ION_HOMEOSTASIS	36	-0.644366	-1.67812	0.00140056	0.139906	0.998
GO_PROTEIN_HETEROTRIMERIZATION	12	-0.807593	-1.67556	0.00614439	0.143375	0.999
GO_REGULATION_OF_PLASMINOGEN_ACTIVATION	12	-0.794783	-1.67517	0.0030303	0.141549	0.999
GO_REGULATION_OF_VASCULATURE_DEVELOPMENT	292	-0.508043	-1.67382	0	0.142055	1
GO_REGULATION_OF_SISTER_CHROMATID_SEGREGATION	74	-0.578456	-1.67163	0.00122399	0.14526	1
GO_STRESS_RESPONSE_TO_METAL_ION	16	-0.754682	-1.6712	0.00150602	0.143654	1
GO_NEGATIVE_REGULATION_OF_CYTOKINE_SECRETION	57	-0.598768	-1.66878	0.00135501	0.147075	1
GO_POSITIVE_REGULATION_OF_MYOTUBE_DIFFERENTIATION	30	-0.661926	-1.66757	0.00412088	0.147366	1
GO_NEGATIVE_REGULATION_OF_OXIDOREDUCTASE_ACTIVITY	22	-0.707992	-1.66646	0.00417246	0.147914	1
GO_RESPONSE_TO_FUNGUS	46	-0.617953	-1.66624	0.00256082	0.145918	1
GO_NEGATIVE_REGULATION_OF_PEPTIDASE_ACTIVITY	237	-0.514348	-1.66386	0	0.149507	1
GO_ADAPTIVE_IMMUNE_RESPONSE_BASED_ON_SOMATIC_RECOMBINATION_OF_IMMUNE_RECEPTORS_BUILT_FROM_IMMUNOGLOBULIN_SUPERFAMILY_DOMAINS	246	-0.511134	-1.66158	0	0.15298	1
GO_REGULATION_OF_CHROMOSOME_SEGREGATION	95	-0.558606	-1.65983	0	0.155049	1
GO_NEGATIVE_REGULATION_OF_SINGLE_STRANDED_VIRAL_RNA_REPLICATION_VIA_DOUBLE_STRANDED_DNA_INTERMEDIATE	12	-0.77781	-1.65955	0.00784929	0.153326	1
GO_REGULATION_OF_FIBRINOLYSIS	14	-0.767842	-1.65929	0.00605144	0.151429	1
GO_CELLULAR_RESPONSE_TO_NITRIC_OXIDE	15	-0.748554	-1.65866	0.00154799	0.150798	1
GO_PROGESTERONE_BIOSYNTHETIC_PROCESS	7	-0.904783	-1.65819	0.00343643	0.149748	1
GO_NAD_BIOSYNTHESIS_VIA_NICOTINAMIDE_RIBOSIDE_SALVAGE_PATHWAY	12	-0.800092	-1.65742	0.00618238	0.149146	1
GO_POSITIVE_T_CELL_SELECTION	35	-0.640533	-1.65699	0.0069735	0.147884	1
GO_MITOTIC_NUCLEAR_DIVISION	259	-0.504947	-1.6558	0	0.148848	1
GO_REGULATION_OF_MYOTUBE_DIFFERENTIATION	50	-0.595534	-1.65074	0.00407609	0.160433	1
GO_MICROTUBULE_CYTOSKELETON_ORGANIZATION_INVOLVED_IN_MITOSIS	112	-0.546268	-1.64821	0	0.164541	1
GO_MEIOSIS_II_CELL_CYCLE_PROCESS	7	-0.889434	-1.64751	0	0.16412	1
GO_ATTACHMENT_OF_SPINDLE_MICROTUBULES_TO_KINETOCHORE	26	-0.680603	-1.64484	0.00606061	0.169284	1
GO_PROTEIN_C_LINKED_GLYCOSYLATION	7	-0.898217	-1.64325	0	0.171572	1
GO_INTESTINAL_EPITHELIAL_CELL_DEVELOPMENT	10	-0.815231	-1.64185	0.00634921	0.173055	1
GO_BONE_GROWTH	47	-0.603366	-1.64118	0.00267738	0.172598	1
GO_PYRIDINE_CONTAINING_COMPOUND_BIOSYNTHETIC_PROCESS	30	-0.653468	-1.63982	0.0070028	0.17428	1
GO_NUCLEAR_CHROMOSOME_SEGREGATION	218	-0.507988	-1.63965	0	0.172479	1
GO_REGULATION_OF_CILIUM_MOVEMENT	10	-0.839349	-1.63914	0.005997	0.171719	1
GO_REGULATION_OF_SPROUTING_ANGIOGENESIS	63	-0.574596	-1.63907	0.00393185	0.169754	1
GO_NEGATIVE_REGULATION_OF_VASCULATURE_DEVELOPMENT	109	-0.534973	-1.639	0	0.167897	1
GO_CELLULAR_RESPONSE_TO_OXYGEN_RADICAL	24	-0.67594	-1.63609	0.00142857	0.173919	1
GO_PHOSPHATIDYLINOSITOL_ACYL_CHAIN_REMODELING	16	-0.727576	-1.63601	0.00768049	0.17208	1
GO_SPROUTING_ANGIOGENESIS	104	-0.545775	-1.63555	0	0.171506	1
GO_CELLULAR_RESPONSE_TO_ZINC_ION	22	-0.690018	-1.63374	0.0100575	0.174139	1
GO_NEGATIVE_T_CELL_SELECTION	12	-0.791279	-1.63153	0.00634921	0.178311	1
GO_CENTROSOME_DUPLICATION	60	-0.578545	-1.63125	0.00521512	0.177013	1
GO_POSITIVE_REGULATION_OF_RECEPTOR_BINDING	10	-0.825395	-1.63005	0.00157233	0.178428	1
GO_CELLULAR_RESPONSE_TO_NUTRIENT	65	-0.57049	-1.62841	0.0037037	0.181243	1
GO_REGULATORY_T_CELL_DIFFERENTIATION	28	-0.653369	-1.62803	0.0041841	0.180307	1
GO_REGULATION_OF_CELL_SHAPE	139	-0.526794	-1.628	0	0.178421	1
GO_MEMBRANE_DISRUPTION_IN_OTHER_ORGANISM	8	-0.869806	-1.62725	0.00477707	0.178673	1
GO_ENDODERM_FORMATION	50	-0.595617	-1.62592	0.00531209	0.180283	1
GO_CILIUM_MOVEMENT_INVOLVED_IN_CELL_MOTILITY	15	-0.743632	-1.62443	0.00609756	0.182585	1
GO_MOTILE_CILIUM_ASSEMBLY	17	-0.728262	-1.6223	0.00728863	0.186913	1
GO_VITAMIN_CATABOLIC_PROCESS	12	-0.78587	-1.62085	0.00650406	0.18929	1
GO_EMBRYO_IMPLANTATION	44	-0.60402	-1.61757	0.00407056	0.196668	1
GO_INTERLEUKIN_6_SECRETION	36	-0.628961	-1.6156	0.00576369	0.200586	1
GO_NEGATIVE_REGULATION_OF_INTERLEUKIN_8_SECRETION	6	-0.899863	-1.60883	0.00481541	0.220662	1
Table S2B
List of top 100 biological processes negatively associated with IDH mutation in 1p/19q noncodel LGGs of CGGA325 LGG
NAME	SIZE	ES	NES	NOM p-val	FDR q-val	FWER p-val
GO_ACUTE_INFLAMMATORY_RESPONSE	91	-0.652413	-2.35026	0	0	0
GO_CILIUM_MOVEMENT	48	-0.711003	-2.31547	0	0	0
GO_NEUTROPHIL_MIGRATION	91	-0.646638	-2.31111	0	0	0
GO_HUMORAL_IMMUNE_RESPONSE	195	-0.586113	-2.30954	0	0	0
GO_GRANULOCYTE_MIGRATION	110	-0.616238	-2.29325	0	0	0
GO_B_CELL_MEDIATED_IMMUNITY	133	-0.600463	-2.27537	0	0	0
GO_ADAPTIVE_IMMUNE_RESPONSE_BASED_ON_SOMATIC_RECOMBINATION_OF_IMMUNE_RECEPTORS_BUILT_FROM_IMMUNOGLOBULIN_SUPERFAMILY_DOMAINS	260	-0.557018	-2.25998	0	0	0
GO_ANTIMICROBIAL_HUMORAL_RESPONSE	69	-0.643495	-2.24492	0	0.00013325	0.001
GO_MYELOID_LEUKOCYTE_MIGRATION	170	-0.558797	-2.19857	0	0.000118444	0.001
GO_ZINC_ION_HOMEOSTASIS	32	-0.750031	-2.19841	0	0.0001066	0.001
GO_ADAPTIVE_IMMUNE_RESPONSE	377	-0.522919	-2.19653	0	9.6909e-05	0.001
GO_CYTOKINE_METABOLIC_PROCESS	99	-0.604146	-2.18917	0	8.88333e-05	0.001
GO_LEUKOCYTE_MIGRATION	400	-0.519753	-2.1808	0	8.19999e-05	0.001
GO_COLLAGEN_FIBRIL_ORGANIZATION	50	-0.656603	-2.16578	0	0.000306451	0.004
GO_HUMORAL_IMMUNE_RESPONSE_MEDIATED_BY_CIRCULATING_IMMUNOGLOBULIN	74	-0.622122	-2.15325	0	0.00042879	0.006
GO_LYMPHOCYTE_MEDIATED_IMMUNITY	248	-0.524107	-2.13612	0	0.000469429	0.007
GO_T_CELL_MIGRATION	55	-0.633934	-2.12113	0	0.000567414	0.009
GO_NEGATIVE_REGULATION_OF_VIRAL_GENOME_REPLICATION	50	-0.651671	-2.10909	0	0.000654256	0.011
GO_NEGATIVE_REGULATION_OF_CYTOKINE_BIOSYNTHETIC_PROCESS	29	-0.717727	-2.10568	0	0.000619822	0.011
GO_RESPONSE_TO_INTERFERON_GAMMA	178	-0.535496	-2.10178	0	0.000641566	0.012
GO_ACUTE_PHASE_RESPONSE	33	-0.700144	-2.08405	0	0.000661743	0.013
GO_EXTRACELLULAR_STRUCTURE_ORGANIZATION	379	-0.495327	-2.08116	0	0.000680173	0.014
GO_T_CELL_MEDIATED_IMMUNITY	92	-0.572108	-2.05748	0	0.00149087	0.032
GO_LEUKOCYTE_CHEMOTAXIS	187	-0.5207	-2.05729	0	0.00142875	0.032
GO_TISSUE_REMODELING	137	-0.534998	-2.05672	0	0.00141445	0.033
GO_POSITIVE_REGULATION_OF_ACUTE_INFLAMMATORY_RESPONSE	28	-0.713262	-2.05606	0	0.00140163	0.034
GO_CELLULAR_RESPONSE_TO_COPPER_ION	22	-0.730221	-2.04498	0	0.00178686	0.045
GO_CELLULAR_RESPONSE_TO_OXYGEN_RADICAL	25	-0.712717	-2.04434	0	0.001761	0.046
GO_RESPONSE_TO_FUNGUS	31	-0.676492	-2.04331	0	0.00173746	0.047
GO_NEGATIVE_REGULATION_OF_CYTOKINE_SECRETION	54	-0.626697	-2.04303	0	0.00167955	0.047
GO_RESPONSE_TO_BACTERIUM	494	-0.479928	-2.03967	0	0.00172906	0.049
GO_REGULATION_OF_PRODUCTION_OF_MOLECULAR_MEDIATOR_OF_IMMUNE_RESPONSE	128	-0.545081	-2.03812	0	0.00170842	0.05
GO_INTERLEUKIN_8_PRODUCTION	63	-0.603439	-2.03693	0	0.001689	0.051
GO_DEFENSE_RESPONSE_TO_OTHER_ORGANISM	379	-0.483232	-2.0358	0	0.00163932	0.051
GO_REGULATION_OF_RESPONSE_TO_CYTOKINE_STIMULUS	153	-0.523665	-2.03563	0	0.00159248	0.051
GO_CELL_CHEMOTAXIS	253	-0.503451	-2.03333	0	0.00169665	0.056
GO_DEFENSE_RESPONSE_TO_BACTERIUM	174	-0.5159	-2.02857	0	0.00170868	0.058
GO_REGULATION_OF_VIRAL_LIFE_CYCLE	126	-0.539911	-2.02744	0	0.00172028	0.06
GO_RESPONSE_TO_COPPER_ION	37	-0.645708	-2.02516	0	0.00175881	0.063
GO_NEGATIVE_REGULATION_OF_CYTOKINE_PRODUCTION	229	-0.504202	-2.02485	0	0.00171484	0.063
GO_REGULATION_OF_HUMORAL_IMMUNE_RESPONSE	80	-0.570618	-2.01827	0	0.00196166	0.074
GO_PRODUCTION_OF_MOLECULAR_MEDIATOR_OF_IMMUNE_RESPONSE	192	-0.510584	-2.01506	0	0.00199126	0.076
GO_T_CELL_ACTIVATION_INVOLVED_IN_IMMUNE_RESPONSE	78	-0.571936	-2.01455	0	0.00194495	0.076
GO_REGULATION_OF_VASCULATURE_DEVELOPMENT	284	-0.486268	-2.0127	0	0.00197432	0.079
GO_MONOCYTE_CHEMOTAXIS	49	-0.625149	-2.00867	0	0.00207359	0.085
GO_POSITIVE_REGULATION_OF_CELL_ACTIVATION	317	-0.480659	-2.00718	0	0.0020982	0.088
GO_T_CELL_SELECTION	45	-0.634642	-2.00512	0	0.00223587	0.094
GO_REGULATION_OF_ACUTE_INFLAMMATORY_RESPONSE	40	-0.642761	-1.99824	0	0.00256772	0.109
GO_REGULATION_OF_ADAPTIVE_IMMUNE_RESPONSE	143	-0.522828	-1.99759	0	0.00251531	0.109
GO_NEGATIVE_REGULATION_OF_VIRAL_PROCESS	82	-0.565046	-1.99552	0	0.00253029	0.11
GO_INTERFERON_GAMMA_MEDIATED_SIGNALING_PATHWAY	84	-0.567465	-1.9911	0	0.00273245	0.121
GO_COLLAGEN_CATABOLIC_PROCESS	41	-0.623112	-1.98926	0	0.00274128	0.123
GO_DEFENSE_RESPONSE_TO_FUNGUS	20	-0.748862	-1.98883	0	0.00270989	0.124
GO_REGULATION_OF_B_CELL_ACTIVATION	128	-0.522739	-1.98807	0	0.00273992	0.125
GO_POSITIVE_REGULATION_OF_LYMPHOCYTE_ACTIVATION	266	-0.484553	-1.98682	0	0.00276813	0.127
GO_T_CELL_ACTIVATION	412	-0.466752	-1.98582	0	0.00275706	0.129
GO_REGULATION_OF_VIRAL_GENOME_REPLICATION	83	-0.554309	-1.98576	0	0.00270869	0.129
GO_DENDRITIC_CELL_MIGRATION	27	-0.699202	-1.9824	0	0.0027732	0.135
GO_POSITIVE_REGULATION_OF_HUMORAL_IMMUNE_RESPONSE	14	-0.814415	-1.98158	0	0.00279861	0.139
GO_NEGATIVE_REGULATION_OF_COAGULATION	44	-0.626099	-1.97634	0	0.0031988	0.159
GO_DETOXIFICATION	107	-0.535735	-1.97568	0	0.00319916	0.162
GO_NEGATIVE_REGULATION_OF_MULTI_ORGANISM_PROCESS	147	-0.515553	-1.97497	0	0.00316508	0.163
GO_ACUTE_INFLAMMATORY_RESPONSE_TO_ANTIGENIC_STIMULUS	21	-0.728888	-1.97288	0.00168919	0.00326913	0.17
GO_CELLULAR_RESPONSE_TO_ZINC_ION	19	-0.743833	-1.97267	0	0.00321805	0.17
GO_B_CELL_RECEPTOR_SIGNALING_PATHWAY	75	-0.564005	-1.96953	0	0.0034657	0.181
GO_PROTEIN_HETEROTRIMERIZATION	11	-0.857084	-1.9661	0	0.00360866	0.192
GO_ENTRY_INTO_OTHER_ORGANISM_INVOLVED_IN_SYMBIOTIC_INTERACTION	117	-0.527919	-1.9625	0	0.00382679	0.207
GO_FIBRINOLYSIS	19	-0.740821	-1.9613	0	0.00383443	0.21
GO_NEGATIVE_REGULATION_OF_PEPTIDASE_ACTIVITY	185	-0.500879	-1.96045	0	0.0037945	0.211
GO_NEGATIVE_REGULATION_OF_IMMUNE_RESPONSE	123	-0.52481	-1.95852	0	0.00389333	0.219
GO_STRESS_RESPONSE_TO_METAL_ION	13	-0.804598	-1.95714	0	0.00391453	0.222
GO_LEUKOCYTE_DIFFERENTIATION	453	-0.457639	-1.95666	0	0.00390434	0.225
GO_REGULATION_OF_LEUKOCYTE_PROLIFERATION	197	-0.490448	-1.95619	0	0.00389522	0.227
GO_NEGATIVE_REGULATION_OF_CELL_ACTIVATION	168	-0.502872	-1.95549	0	0.0038859	0.23
GO_CELL_MIGRATION_INVOLVED_IN_SPROUTING_ANGIOGENESIS	54	-0.58928	-1.95431	0	0.00393451	0.237
GO_DEFENSE_RESPONSE_TO_GRAM_NEGATIVE_BACTERIUM	42	-0.620781	-1.95322	0	0.00400927	0.243
GO_CARTILAGE_DEVELOPMENT_INVOLVED_IN_ENDOCHONDRAL_BONE_MORPHOGENESIS	46	-0.602187	-1.95058	0	0.00422072	0.258
GO_REGULATION_OF_LYMPHOCYTE_ACTIVATION	399	-0.461786	-1.94698	0	0.00441355	0.273
GO_REGULATION_OF_IMMUNE_EFFECTOR_PROCESS	370	-0.464232	-1.94479	0	0.00456146	0.284
GO_REGULATION_OF_CYTOKINE_PRODUCTION_INVOLVED_IN_IMMUNE_RESPONSE	79	-0.544249	-1.94444	0	0.00454474	0.284
GO_KERATAN_SULFATE_BIOSYNTHETIC_PROCESS	25	-0.685541	-1.94309	0	0.00454153	0.287
GO_COLLAGEN_BIOSYNTHETIC_PROCESS	39	-0.633672	-1.94293	0	0.00448615	0.287
GO_POSITIVE_REGULATION_OF_INFLAMMATORY_RESPONSE	126	-0.515482	-1.94136	0	0.00453456	0.29
GO_ALPHA_BETA_T_CELL_ACTIVATION	125	-0.519889	-1.94105	0	0.00451894	0.292
GO_LEUKOCYTE_PROLIFERATION	250	-0.477266	-1.94097	0	0.00446577	0.292
GO_BLOOD_VESSEL_ENDOTHELIAL_CELL_MIGRATION	108	-0.531042	-1.94089	0	0.00441385	0.292
GO_AXONEMAL_DYNEIN_COMPLEX_ASSEMBLY	25	-0.67979	-1.93908	0	0.0044616	0.298
GO_CELLULAR_RESPONSE_TO_VITAMIN	28	-0.669447	-1.93656	0	0.00461788	0.31
GO_NEGATIVE_REGULATION_OF_LEUKOCYTE_MEDIATED_IMMUNITY	45	-0.606549	-1.93655	0	0.00456599	0.31
GO_POSITIVE_REGULATION_OF_TOLL_LIKE_RECEPTOR_4_SIGNALING_PATHWAY	9	-0.889551	-1.93611	0	0.00452715	0.311
GO_MATERNAL_PROCESS_INVOLVED_IN_FEMALE_PREGNANCY	60	-0.571798	-1.93332	0	0.00471242	0.326
GO_REGULATION_OF_COAGULATION	69	-0.561692	-1.93331	0	0.0046612	0.326
GO_POSITIVE_REGULATION_OF_RESPONSE_TO_EXTERNAL_STIMULUS	273	-0.478972	-1.93287	0	0.0046456	0.328
GO_RESPONSE_TO_MOLECULE_OF_BACTERIAL_ORIGIN	296	-0.471213	-1.93249	0	0.00464202	0.332
GO_NEGATIVE_REGULATION_OF_COLLAGEN_BIOSYNTHETIC_PROCESS	11	-0.827252	-1.93214	0	0.00461559	0.333
GO_REGULATION_OF_B_CELL_MEDIATED_IMMUNITY	45	-0.603466	-1.93131	0	0.00464583	0.338
GO_CATECHOLAMINE_BIOSYNTHETIC_PROCESS	19	-0.7247	-1.93112	0	0.00459793	0.338
GO_REGULATION_OF_LEUKOCYTE_MIGRATION	173	-0.496868	-1.93023	0	0.00468202	0.347
GO_POSITIVE_REGULATION_OF_T_CELL_PROLIFERATION	84	-0.546253	-1.92779	0	0.00491607	0.367
GO_CYTOKINE_PRODUCTION_INVOLVED_IN_IMMUNE_RESPONSE	93	-0.532257	-1.92737	0	0.00492043	0.371
Table S2C
List of top 100 biological processes negatively associated with IDH mutation in 1p/19q noncodel LGGs of CGGA693 LGG
NAME	SIZE	ES	NES	NOM p-val	FDR q-val	FWER p-val
GO_COLLAGEN_FIBRIL_ORGANIZATION	50	-0.68129	-2.05621	0	0.00190701	0.002
GO_CILIUM_MOVEMENT	48	-0.684247	-2.05319	0	0.0014304	0.003
GO_B_CELL_MEDIATED_IMMUNITY	114	-0.595608	-2.00009	0	0.0057118	0.018
GO_CARTILAGE_DEVELOPMENT_INVOLVED_IN_ENDOCHONDRAL_BONE_MORPHOGENESIS	44	-0.669486	-1.97803	0	0.00737627	0.031
GO_HUMORAL_IMMUNE_RESPONSE_MEDIATED_BY_CIRCULATING_IMMUNOGLOBULIN	55	-0.638034	-1.96822	0	0.00857078	0.044
GO_REGULATION_OF_CILIUM_MOVEMENT	13	-0.838848	-1.9495	0	0.0136373	0.083
GO_GROWTH_PLATE_CARTILAGE_DEVELOPMENT	33	-0.675864	-1.90324	0	0.0289379	0.188
GO_PHAGOCYTOSIS_RECOGNITION	28	-0.697462	-1.8987	0	0.026983	0.198
GO_EPITHELIAL_CELL_MATURATION	14	-0.784159	-1.8851	0.00154799	0.0350842	0.284
GO_BONE_GROWTH	44	-0.644051	-1.88395	0	0.0320488	0.286
GO_REGULATION_OF_MICROTUBULE_BASED_MOVEMENT	24	-0.72553	-1.8834	0.00141844	0.0295673	0.29
GO_PROTEIN_HETEROTRIMERIZATION	11	-0.8402	-1.85819	0	0.0487373	0.468
GO_EXCRETION	56	-0.601103	-1.85339	0	0.0492275	0.5
GO_EXTRACELLULAR_STRUCTURE_ORGANIZATION	376	-0.499814	-1.85115	0	0.0482914	0.522
GO_THYMIC_T_CELL_SELECTION	20	-0.709806	-1.84366	0.00140845	0.0512219	0.566
GO_LYMPH_VESSEL_DEVELOPMENT	25	-0.682806	-1.84038	0.00275103	0.0514073	0.59
GO_ADAPTIVE_IMMUNE_RESPONSE_BASED_ON_SOMATIC_RECOMBINATION_OF_IMMUNE_RECEPTORS_BUILT_FROM_IMMUNOGLOBULIN_SUPERFAMILY_DOMAINS	240	-0.508001	-1.82783	0	0.0615335	0.667
GO_B_CELL_RECEPTOR_SIGNALING_PATHWAY	70	-0.578031	-1.82206	0	0.0650879	0.707
GO_CILIUM_OR_FLAGELLUM_DEPENDENT_CELL_MOTILITY	29	-0.668358	-1.81803	0	0.0663687	0.735
GO_CELLULAR_RESPONSE_TO_VITAMIN	28	-0.672568	-1.81519	0	0.0665718	0.761
GO_BEHAVIORAL_RESPONSE_TO_PAIN	13	-0.791758	-1.8143	0	0.0641252	0.765
GO_GROWTH_PLATE_CARTILAGE_MORPHOGENESIS	18	-0.722719	-1.81354	0	0.0618579	0.768
GO_CARTILAGE_MORPHOGENESIS	27	-0.67736	-1.81293	0	0.0597876	0.773
GO_REGULATION_OF_CELL_MIGRATION_INVOLVED_IN_SPROUTING_ANGIOGENESIS	38	-0.635953	-1.81125	0	0.0590807	0.782
GO_T_CELL_SELECTION	45	-0.608894	-1.81094	0.00129702	0.0572494	0.784
GO_NEGATIVE_REGULATION_OF_ACUTE_INFLAMMATORY_RESPONSE	9	-0.858948	-1.80301	0	0.0650738	0.835
GO_POSITIVE_REGULATION_OF_RECEPTOR_BINDING	10	-0.820303	-1.79634	0.00308166	0.0713663	0.875
GO_ENDOCHONDRAL_BONE_MORPHOGENESIS	68	-0.558098	-1.78831	0	0.0792457	0.905
GO_COLLAGEN_CATABOLIC_PROCESS	37	-0.624778	-1.78222	0.00134409	0.0852638	0.926
GO_CORNIFICATION	47	-0.592388	-1.78143	0	0.0837819	0.926
GO_REGULATION_OF_MYOTUBE_DIFFERENTIATION	48	-0.596307	-1.78078	0.00128041	0.0822756	0.927
GO_FIBRINOLYSIS	21	-0.703254	-1.77994	0.00136054	0.0809833	0.932
GO_CELLULAR_RESPONSE_TO_COPPER_ION	22	-0.682703	-1.77838	0.0013986	0.0808072	0.936
GO_ENDODERM_DEVELOPMENT	68	-0.569963	-1.77593	0	0.081787	0.942
GO_LIPOPROTEIN_LOCALIZATION	15	-0.750606	-1.77413	0	0.0822759	0.947
GO_TISSUE_REMODELING	138	-0.517285	-1.77352	0	0.0808372	0.948
GO_EPITHELIAL_CILIUM_MOVEMENT	21	-0.691975	-1.77236	0	0.0800905	0.948
GO_REGULATION_OF_B_CELL_ACTIVATION	124	-0.518392	-1.7716	0	0.0789072	0.95
GO_NEGATIVE_REGULATION_OF_PEPTIDASE_ACTIVITY	187	-0.498802	-1.76737	0	0.0826849	0.962
GO_AXONEME_ASSEMBLY	44	-0.606759	-1.76567	0.0026178	0.0829466	0.965
GO_LYMPHOCYTE_MEDIATED_IMMUNITY	228	-0.492055	-1.76541	0	0.0814342	0.965
GO_REGULATION_OF_HUMORAL_IMMUNE_RESPONSE	63	-0.5711	-1.76462	0.00123762	0.0804237	0.969
GO_ENDODERM_FORMATION	47	-0.598385	-1.76349	0	0.0804327	0.97
GO_RESPONSE_TO_TYPE_I_INTERFERON	77	-0.549744	-1.76105	0	0.0818047	0.972
GO_PLASMINOGEN_ACTIVATION	17	-0.733827	-1.75967	0.00145349	0.0820596	0.973
GO_GROWTH_PLATE_CARTILAGE_CHONDROCYTE_DIFFERENTIATION	23	-0.66262	-1.75845	0.00141243	0.0818265	0.975
GO_SPROUTING_ANGIOGENESIS	107	-0.521312	-1.75787	0	0.0808954	0.975
GO_HUMORAL_IMMUNE_RESPONSE	178	-0.503022	-1.75415	0	0.0841837	0.98
GO_CATECHOLAMINE_BIOSYNTHETIC_PROCESS	19	-0.694585	-1.75345	0.0013986	0.0834951	0.982
GO_CELLULAR_RESPONSE_TO_VITAMIN_D	19	-0.700067	-1.75305	0.00426743	0.0823197	0.982
GO_RESPONSE_TO_FUNGUS	30	-0.637769	-1.74981	0.00412655	0.0852938	0.986
GO_NEGATIVE_REGULATION_OF_VASCULATURE_DEVELOPMENT	105	-0.528345	-1.74733	0	0.0874751	0.988
GO_REGULATION_OF_CILIUM_BEAT_FREQUENCY	10	-0.809399	-1.74605	0.00312012	0.0878899	0.99
GO_NEGATIVE_REGULATION_OF_FIBROBLAST_GROWTH_FACTOR_RECEPTOR_SIGNALING_PATHWAY	15	-0.740672	-1.74496	0.00145349	0.0879539	0.991
GO_LYMPH_VESSEL_MORPHOGENESIS	19	-0.683867	-1.74294	0.00144509	0.0893437	0.992
GO_SALIVA_SECRETION	8	-0.842593	-1.74266	0.00315956	0.0880371	0.992
GO_ADAPTIVE_IMMUNE_RESPONSE	353	-0.475277	-1.73852	0	0.0925705	0.994
GO_CELL_MIGRATION_INVOLVED_IN_SPROUTING_ANGIOGENESIS	54	-0.563906	-1.73851	0.00125471	0.0909745	0.994
GO_RESPONSE_TO_MAGNESIUM_ION	16	-0.72014	-1.73847	0.00448431	0.0895292	0.994
GO_PIGMENT_ACCUMULATION	12	-0.774005	-1.73811	0.00302115	0.0884335	0.995
GO_RESPONSE_TO_VITAMIN_D	32	-0.624428	-1.7378	0	0.0874826	0.995
GO_SPONGIOTROPHOBLAST_LAYER_DEVELOPMENT	12	-0.758688	-1.73466	0.00300752	0.0911951	0.996
GO_KERATINIZATION	63	-0.540846	-1.73323	0.00377358	0.0920576	0.996
GO_DEFENSE_RESPONSE_TO_FUNGUS	19	-0.687411	-1.73246	0	0.0916159	0.996
GO_POSITIVE_T_CELL_SELECTION	32	-0.62187	-1.72958	0.0026455	0.0943353	0.998
GO_NEGATIVE_REGULATION_OF_IMMUNE_RESPONSE	121	-0.510165	-1.7253	0	0.0994192	0.998
GO_AXONEMAL_DYNEIN_COMPLEX_ASSEMBLY	25	-0.651292	-1.72495	0.00138889	0.0985607	0.999
GO_NEGATIVE_REGULATION_OF_COAGULATION	46	-0.586213	-1.7244	0	0.0979363	0.999
GO_COMPLEMENT_ACTIVATION	67	-0.547012	-1.72427	0	0.0967517	0.999
GO_REGULATION_OF_SPROUTING_ANGIOGENESIS	65	-0.545038	-1.72086	0	0.100601	0.999
GO_INTERLEUKIN_8_SECRETION	26	-0.633738	-1.72015	0.00287356	0.100322	1
GO_SMOOTH_MUSCLE_CELL_MIGRATION	62	-0.556901	-1.71808	0	0.102364	1
GO_POSITIVE_REGULATION_OF_FATTY_ACID_METABOLIC_PROCESS	15	-0.720892	-1.71562	0.00297177	0.104911	1
GO_POSITIVE_REGULATION_OF_MYOTUBE_DIFFERENTIATION	29	-0.635234	-1.71257	0.00276243	0.108815	1
GO_DEFENSE_RESPONSE_TO_GRAM_NEGATIVE_BACTERIUM	41	-0.583984	-1.71189	0.00520833	0.108494	1
GO_CELL_CELL_ADHESION_MEDIATED_BY_INTEGRIN	16	-0.70781	-1.71052	0.00284495	0.109359	1
GO_CHONDROCYTE_DIFFERENTIATION_INVOLVED_IN_ENDOCHONDRAL_BONE_MORPHOGENESIS	29	-0.623782	-1.71033	0.00271003	0.10821	1
GO_POSITIVE_THYMIC_T_CELL_SELECTION	12	-0.758613	-1.70989	0.0063593	0.107371	1
GO_PROSTATE_GLANDULAR_ACINUS_DEVELOPMENT	11	-0.758176	-1.70603	0.0030581	0.112069	1
GO_RESPONSE_TO_ALUMINUM_ION	5	-0.938569	-1.70564	0	0.11137	1
GO_NEGATIVE_REGULATION_OF_LEUKOCYTE_MEDIATED_IMMUNITY	43	-0.577509	-1.70334	0.00132275	0.114409	1
GO_CELL_DIFFERENTIATION_INVOLVED_IN_EMBRYONIC_PLACENTA_DEVELOPMENT	24	-0.651668	-1.70178	0.0055325	0.11582	1
GO_AMELOGENESIS	17	-0.694497	-1.70048	0.00431035	0.11675	1
GO_MOTILE_CILIUM_ASSEMBLY	18	-0.690187	-1.69932	0.00562588	0.117251	1
GO_T_CELL_MEDIATED_IMMUNITY	90	-0.51955	-1.69745	0	0.11915	1
GO_INTERFERON_GAMMA_MEDIATED_SIGNALING_PATHWAY	81	-0.52503	-1.69452	0	0.12325	1
GO_REGULATION_OF_RECEPTOR_BINDING	23	-0.649202	-1.69346	0.00542741	0.123777	1
GO_FAT_SOLUBLE_VITAMIN_METABOLIC_PROCESS	38	-0.589047	-1.69342	0.00394737	0.122403	1
GO_NEGATIVE_REGULATION_OF_SINGLE_STRANDED_VIRAL_RNA_REPLICATION_VIA_DOUBLE_STRANDED_DNA_INTERMEDIATE	11	-0.743898	-1.68872	0.00309598	0.130641	1
GO_MICROTUBULE_BUNDLE_FORMATION	71	-0.534489	-1.68712	0	0.132383	1
GO_POSITIVE_REGULATION_OF_FATTY_ACID_BIOSYNTHETIC_PROCESS	14	-0.700248	-1.68597	0.00633914	0.133373	1
GO_MESENCHYMAL_EPITHELIAL_CELL_SIGNALING	8	-0.8176	-1.68316	0.00792393	0.137991	1
GO_NAD_BIOSYNTHETIC_PROCESS	25	-0.632625	-1.683	0.00828729	0.136783	1
GO_MALE_MEIOTIC_NUCLEAR_DIVISION	36	-0.586484	-1.68285	0.00263852	0.135632	1
GO_SECRETION_BY_TISSUE	30	-0.614537	-1.68268	0.00421348	0.134394	1
GO_SYNAPTIC_TRANSMISSION_CHOLINERGIC	27	-0.624534	-1.68006	0	0.138227	1
GO_B_CELL_ACTIVATION	220	-0.465265	-1.6783	0	0.14034	1
GO_REPLICATIVE_SENESCENCE	13	-0.729316	-1.67779	0.00892857	0.140141	1
GO_DIVALENT_INORGANIC_ANION_HOMEOSTASIS	9	-0.793763	-1.67736	0.00321543	0.13958	1
GO_CHONDROCYTE_DEVELOPMENT_INVOLVED_IN_ENDOCHONDRAL_BONE_MORPHOGENESIS	23	-0.647813	-1.67716	0	0.138536	1
Table S2D
List of top 10 common biological processes negatively associated with IDH mutation in 1p/19q noncodel LGGs of all three LGG datasets
NAME
GO_CILIUM_MOVEMENT
GO_AXONEME_ASSEMBLY
GO_COLLAGEN_FIBRIL_ORGANIZATION
GO_MICROTUBULE_BUNDLE_FORMATION
GO_FIBRINOLYSIS
GO_CILIUM_OR_FLAGELLUM_DEPENDENT_CELL_MOTILITY
GO_AXONEMAL_DYNEIN_COMPLEX_ASSEMBLY
GO_EXTRACELLULAR_STRUCTURE_ORGANIZATION
GO_RESPONSE_TO_COPPER_ION
GO_T_CELL_SELECTION
ES: Enrichment Score
NES: Normalized Enrichment Score
