# Supplementary material for: Effects of 1p/19q Codeletion on Immune Phenotype in Low Grade Glioma
Source: Front Cell Neurosci. 2021 Jul 16;15:704344. doi: 10.3389/fncel.2021.704344 (PMC8322528; doi:10.3389/fncel.2021.704344)
Supplement: Supplementary Table 3 — List of biological processes negatively associated with 1p/19q codeletion (Codel) of all three LGG datasets. [file Table_3.XLSX]

## Sheet: Table S3
Table S3A
List of top 100 biological processes negatively associated with 1p/19q codeltion (Codel) in TCGA LGG
NAME	SIZE	ES	NES	NOM p-val	FDR q-val	FWER p-val
GO_CYTOKINE_METABOLIC_PROCESS	110	-0.718088	-2.41603	0	0	0
GO_REGULATION_OF_LEUKOCYTE_PROLIFERATION	211	-0.662014	-2.4006	0	0	0
GO_ADAPTIVE_IMMUNE_RESPONSE_BASED_ON_SOMATIC_RECOMBINATION_OF_IMMUNE_RECEPTORS_BUILT_FROM_IMMUNOGLOBULIN_SUPERFAMILY_DOMAINS	246	-0.651597	-2.37938	0	0	0
GO_ADAPTIVE_IMMUNE_RESPONSE	381	-0.625061	-2.37355	0	0	0
GO_LEUKOCYTE_PROLIFERATION	281	-0.630911	-2.37047	0	0	0
GO_T_CELL_PROLIFERATION	174	-0.667112	-2.35704	0	0	0
GO_POSITIVE_REGULATION_OF_T_CELL_PROLIFERATION	92	-0.720792	-2.35542	0	0	0
GO_POSITIVE_REGULATION_OF_LEUKOCYTE_CELL_CELL_ADHESION	209	-0.644027	-2.34934	0	0	0
GO_T_CELL_ACTIVATION_INVOLVED_IN_IMMUNE_RESPONSE	98	-0.714625	-2.3448	0	0	0
GO_POSITIVE_REGULATION_OF_CYTOKINE_BIOSYNTHETIC_PROCESS	61	-0.765709	-2.32866	0	0	0
GO_INTERFERON_GAMMA_PRODUCTION	104	-0.697831	-2.31964	0	0	0
GO_INTERLEUKIN_8_PRODUCTION	69	-0.746542	-2.31706	0	0	0
GO_INTERFERON_GAMMA_MEDIATED_SIGNALING_PATHWAY	87	-0.711216	-2.31102	0	0	0
GO_POSITIVE_REGULATION_OF_CELL_ACTIVATION	307	-0.614419	-2.30927	0	0	0
GO_LYMPHOCYTE_ACTIVATION_INVOLVED_IN_IMMUNE_RESPONSE	169	-0.659359	-2.30824	0	0	0
GO_RESPONSE_TO_INTERFERON_GAMMA	192	-0.648952	-2.30818	0	0	0
GO_POSITIVE_REGULATION_OF_LEUKOCYTE_DIFFERENTIATION	137	-0.667461	-2.30087	0	0	0
GO_POSITIVE_REGULATION_OF_LEUKOCYTE_PROLIFERATION	132	-0.665207	-2.30062	0	0	0
GO_LYMPHOCYTE_MEDIATED_IMMUNITY	237	-0.630398	-2.30033	0	0	0
GO_T_CELL_ACTIVATION	443	-0.59902	-2.29414	0	0	0
GO_ALPHA_BETA_T_CELL_ACTIVATION	133	-0.664627	-2.27901	0	0	0
GO_POSITIVE_REGULATION_OF_INTERFERON_GAMMA_PRODUCTION	62	-0.738093	-2.27695	0	0	0
GO_CELLULAR_RESPONSE_TO_BIOTIC_STIMULUS	211	-0.629664	-2.2642	0	0	0
GO_POSITIVE_REGULATION_OF_LYMPHOCYTE_ACTIVATION	256	-0.610544	-2.25924	0	0	0
GO_B_CELL_MEDIATED_IMMUNITY	109	-0.669407	-2.25739	0	0	0
GO_POSITIVE_REGULATION_OF_HEMOPOIESIS	172	-0.638902	-2.25619	0	0	0
GO_POSITIVE_REGULATION_OF_CYTOKINE_PRODUCTION	422	-0.592024	-2.25564	0	0	0
GO_REGULATION_OF_ADAPTIVE_IMMUNE_RESPONSE	155	-0.650349	-2.25338	0	0	0
GO_INTERLEUKIN_1_PRODUCTION	90	-0.684537	-2.24002	0	0	0
GO_REGULATION_OF_IMMUNE_EFFECTOR_PROCESS	374	-0.590056	-2.2345	0	0	0
GO_LEUKOCYTE_CELL_CELL_ADHESION	316	-0.596804	-2.22708	0	0	0
GO_CYTOKINE_SECRETION	206	-0.618561	-2.22346	0	0	0
GO_LEUKOCYTE_DIFFERENTIATION	488	-0.573808	-2.22147	0	0	0
GO_LIPOPOLYSACCHARIDE_MEDIATED_SIGNALING_PATHWAY	55	-0.738023	-2.21965	0	0	0
GO_REGULATION_OF_LEUKOCYTE_DIFFERENTIATION	255	-0.602841	-2.21937	0	0	0
GO_POSITIVE_REGULATION_OF_LYMPHOCYTE_DIFFERENTIATION	90	-0.674292	-2.21599	0	0	0
GO_REGULATION_OF_T_CELL_ACTIVATION	300	-0.590437	-2.20251	0	0	0
GO_REGULATION_OF_LYMPHOCYTE_ACTIVATION	398	-0.574745	-2.19607	0	0	0
GO_REGULATION_OF_CYTOKINE_PRODUCTION_INVOLVED_IN_IMMUNE_RESPONSE	83	-0.677738	-2.19413	0	0	0
GO_POSITIVE_REGULATION_OF_INTERLEUKIN_8_PRODUCTION	46	-0.745829	-2.19337	0	0	0
GO_INTERLEUKIN_1_BETA_PRODUCTION	77	-0.693958	-2.17687	0	0	0
GO_POSITIVE_REGULATION_OF_CELL_CELL_ADHESION	241	-0.597066	-2.17378	0	0	0
GO_POSITIVE_REGULATION_OF_CYTOKINE_SECRETION	126	-0.635774	-2.17285	0	0	0
GO_T_CELL_DIFFERENTIATION_INVOLVED_IN_IMMUNE_RESPONSE	64	-0.700412	-2.17109	0	0	0
GO_NEGATIVE_REGULATION_OF_LYMPHOCYTE_ACTIVATION	136	-0.634922	-2.16747	0	0	0
GO_POSITIVE_REGULATION_OF_CHEMOKINE_PRODUCTION	52	-0.706052	-2.16503	0	0	0
GO_RESPONSE_TO_TYPE_I_INTERFERON	93	-0.662453	-2.16369	0	0	0
GO_CD4_POSITIVE_ALPHA_BETA_T_CELL_ACTIVATION	85	-0.666276	-2.16047	0	0	0
GO_REGULATION_OF_LEUKOCYTE_MEDIATED_IMMUNITY	194	-0.601613	-2.15723	0	0	0
GO_INTERLEUKIN_8_SECRETION	26	-0.811936	-2.15637	0	0	0
GO_DEFENSE_RESPONSE_TO_OTHER_ORGANISM	453	-0.558757	-2.15365	0	0	0
GO_POSITIVE_REGULATION_OF_INTERLEUKIN_6_PRODUCTION	78	-0.678335	-2.15167	0	0	0
GO_MYELOID_LEUKOCYTE_DIFFERENTIATION	192	-0.595772	-2.14997	0	0	0
GO_POSITIVE_REGULATION_OF_IMMUNE_EFFECTOR_PROCESS	204	-0.593574	-2.14947	0	0	0
GO_REGULATION_OF_ALPHA_BETA_T_CELL_ACTIVATION	90	-0.660583	-2.14929	0	0	0
GO_POSITIVE_REGULATION_OF_ADAPTIVE_IMMUNE_RESPONSE	99	-0.645971	-2.14096	0	0	0
GO_INTERLEUKIN_6_PRODUCTION	127	-0.622364	-2.13804	0	0	0
GO_PATTERN_RECOGNITION_RECEPTOR_SIGNALING_PATHWAY	179	-0.595418	-2.13754	0	0	0
GO_RESPONSE_TO_MOLECULE_OF_BACTERIAL_ORIGIN	317	-0.57008	-2.13356	0	0	0
GO_NEGATIVE_REGULATION_OF_IMMUNE_EFFECTOR_PROCESS	115	-0.622336	-2.12814	0	0	0
GO_HUMORAL_IMMUNE_RESPONSE_MEDIATED_BY_CIRCULATING_IMMUNOGLOBULIN	45	-0.730791	-2.1259	0	0	0
GO_NEGATIVE_REGULATION_OF_IMMUNE_SYSTEM_PROCESS	417	-0.555165	-2.12578	0	0	0
GO_LEUKOCYTE_MIGRATION	402	-0.557384	-2.12341	0	0	0
GO_LEUKOCYTE_MEDIATED_CYTOTOXICITY	104	-0.63606	-2.12271	0	1.806e-05	0.001
GO_TYPE_I_INTERFERON_PRODUCTION	120	-0.623328	-2.1218	0	1.77822e-05	0.001
GO_REGULATION_OF_LYMPHOCYTE_MEDIATED_IMMUNITY	145	-0.605705	-2.12073	0	1.75127e-05	0.001
GO_INTERLEUKIN_1_BETA_SECRETION	48	-0.72396	-2.11722	0	1.72514e-05	0.001
GO_REGULATION_OF_CD4_POSITIVE_ALPHA_BETA_T_CELL_DIFFERENTIATION	46	-0.716719	-2.116	0	1.69977e-05	0.001
GO_NEGATIVE_REGULATION_OF_TYPE_I_INTERFERON_PRODUCTION	41	-0.73178	-2.116	0	1.67513e-05	0.001
GO_REGULATION_OF_CD4_POSITIVE_ALPHA_BETA_T_CELL_ACTIVATION	56	-0.697148	-2.11042	0	1.6512e-05	0.001
GO_CELL_KILLING	153	-0.609812	-2.10766	0	1.62795e-05	0.001
GO_MONONUCLEAR_CELL_MIGRATION	84	-0.647845	-2.10685	0	1.60534e-05	0.001
GO_T_CELL_DIFFERENTIATION	227	-0.579143	-2.10647	0	1.58334e-05	0.001
GO_REGULATION_OF_CELL_CELL_ADHESION	368	-0.554186	-2.10514	0	1.56195e-05	0.001
GO_NEGATIVE_REGULATION_OF_LEUKOCYTE_PROLIFERATION	76	-0.665209	-2.10513	0	1.54112e-05	0.001
GO_INTERLEUKIN_1_SECRETION	55	-0.695025	-2.10384	0	1.52084e-05	0.001
GO_NEGATIVE_REGULATION_OF_LEUKOCYTE_CELL_CELL_ADHESION	112	-0.624478	-2.10315	0	1.50109e-05	0.001
GO_NEGATIVE_REGULATION_OF_CYTOKINE_PRODUCTION	245	-0.575804	-2.10293	0	1.48185e-05	0.001
GO_CHEMOKINE_PRODUCTION	79	-0.656561	-2.10158	0	1.46309e-05	0.001
GO_REGULATION_OF_INNATE_IMMUNE_RESPONSE	414	-0.547999	-2.10129	0	1.4448e-05	0.001
GO_ALPHA_BETA_T_CELL_DIFFERENTIATION	100	-0.638165	-2.10072	0	1.42696e-05	0.001
GO_MYD88_DEPENDENT_TOLL_LIKE_RECEPTOR_SIGNALING_PATHWAY	36	-0.745	-2.1007	0	1.40956e-05	0.001
GO_LYMPHOCYTE_DIFFERENTIATION	337	-0.560302	-2.09895	0	2.77547e-05	0.002
GO_REGULATION_OF_PRODUCTION_OF_MOLECULAR_MEDIATOR_OF_IMMUNE_RESPONSE	135	-0.609728	-2.09874	0	2.74243e-05	0.002
GO_INTERFERON_BETA_PRODUCTION	49	-0.706173	-2.0976	0	2.71016e-05	0.002
GO_T_HELPER_1_TYPE_IMMUNE_RESPONSE	41	-0.740013	-2.09627	0	2.67865e-05	0.002
GO_DEFENSE_RESPONSE_TO_VIRUS	222	-0.572248	-2.09413	0	2.64786e-05	0.002
GO_POSITIVE_REGULATION_OF_MYELOID_CELL_DIFFERENTIATION	83	-0.65345	-2.09257	0	2.61777e-05	0.002
GO_TOLL_LIKE_RECEPTOR_SIGNALING_PATHWAY	134	-0.611251	-2.08945	0	2.58836e-05	0.002
GO_B_CELL_PROLIFERATION	91	-0.633298	-2.08289	0	2.5596e-05	0.002
GO_POSITIVE_REGULATION_OF_CELL_ADHESION	380	-0.550138	-2.08092	0	2.53147e-05	0.002
GO_POSITIVE_REGULATION_OF_MYELOID_LEUKOCYTE_DIFFERENTIATION	51	-0.70241	-2.07864	0	2.50395e-05	0.002
GO_INTERLEUKIN_6_BIOSYNTHETIC_PROCESS	22	-0.819602	-2.07466	0	2.47703e-05	0.002
GO_INTERFERON_ALPHA_PRODUCTION	30	-0.759027	-2.07383	0	2.45068e-05	0.002
GO_MACROPHAGE_ACTIVATION	82	-0.650034	-2.06892	0	3.63449e-05	0.003
GO_NEGATIVE_REGULATION_OF_CELL_ACTIVATION	178	-0.575866	-2.06395	0	4.77153e-05	0.004
GO_POSITIVE_REGULATION_OF_ALPHA_BETA_T_CELL_ACTIVATION	61	-0.674219	-2.06351	0	4.72234e-05	0.004
GO_REGULATION_OF_LEUKOCYTE_MIGRATION	172	-0.579895	-2.06049	0	4.67416e-05	0.004
GO_NEGATIVE_REGULATION_OF_IMMUNE_RESPONSE	136	-0.603019	-2.0597	0	4.62694e-05	0.004
GO_POSITIVE_REGULATION_OF_RESPONSE_TO_CYTOKINE_STIMULUS	53	-0.688227	-2.05724	0	4.58067e-05	0.004
Table S3B
List of top 100 biological processes negatively associated with 1p/19q codeltion (Codel) in CGGA325 LGG
NAME	SIZE	ES	NES	NOM p-val	FDR q-val	FWER p-val
GO_HUMORAL_IMMUNE_RESPONSE_MEDIATED_BY_CIRCULATING_IMMUNOGLOBULIN	74	-0.824573	-2.65781	0	0	0
GO_REGULATION_OF_HUMORAL_IMMUNE_RESPONSE	80	-0.783779	-2.53314	0	0	0
GO_COMPLEMENT_ACTIVATION	84	-0.761977	-2.47994	0	0	0
GO_B_CELL_MEDIATED_IMMUNITY	133	-0.71348	-2.43137	0	0	0
GO_LYMPHOCYTE_MEDIATED_IMMUNITY	248	-0.670569	-2.3964	0	0	0
GO_CYTOKINE_METABOLIC_PROCESS	99	-0.719553	-2.39245	0	0	0
GO_POSITIVE_REGULATION_OF_CYTOKINE_BIOSYNTHETIC_PROCESS	55	-0.768784	-2.38556	0	0	0
GO_ADAPTIVE_IMMUNE_RESPONSE_BASED_ON_SOMATIC_RECOMBINATION_OF_IMMUNE_RECEPTORS_BUILT_FROM_IMMUNOGLOBULIN_SUPERFAMILY_DOMAINS	260	-0.667855	-2.37542	0	0	0
GO_FC_RECEPTOR_MEDIATED_STIMULATORY_SIGNALING_PATHWAY	106	-0.701369	-2.3643	0	0	0
GO_INTERFERON_GAMMA_PRODUCTION	95	-0.710429	-2.34601	0	0	0
GO_ADAPTIVE_IMMUNE_RESPONSE	377	-0.646553	-2.34021	0	0	0
GO_HUMORAL_IMMUNE_RESPONSE	195	-0.668745	-2.33807	0	0	0
GO_B_CELL_RECEPTOR_SIGNALING_PATHWAY	75	-0.724652	-2.33716	0	0	0
GO_POSITIVE_REGULATION_OF_INTERFERON_GAMMA_PRODUCTION	56	-0.73592	-2.31025	0	0	0
GO_POSITIVE_REGULATION_OF_LEUKOCYTE_CELL_CELL_ADHESION	201	-0.642378	-2.29037	0	0	0
GO_REGULATION_OF_IMMUNE_EFFECTOR_PROCESS	370	-0.629258	-2.27408	0	0	0
GO_REGULATION_OF_NEUROINFLAMMATORY_RESPONSE	29	-0.806935	-2.26192	0	0	0
GO_POSITIVE_REGULATION_OF_CELL_ACTIVATION	317	-0.627088	-2.25843	0	0	0
GO_POSITIVE_REGULATION_OF_LYMPHOCYTE_ACTIVATION	266	-0.629111	-2.2537	0	0	0
GO_MACROPHAGE_ACTIVATION	78	-0.687819	-2.24898	0	0	0
GO_PHAGOCYTOSIS_RECOGNITION	33	-0.773018	-2.23485	0	0	0
GO_PHAGOCYTOSIS	266	-0.627153	-2.23356	0	0	0
GO_POSITIVE_REGULATION_OF_B_CELL_ACTIVATION	86	-0.672211	-2.2269	0	0	0
GO_T_CELL_ACTIVATION_INVOLVED_IN_IMMUNE_RESPONSE	78	-0.684365	-2.21666	0	0	0
GO_INTERLEUKIN_2_PRODUCTION	62	-0.702834	-2.21012	0	0	0
GO_REGULATION_OF_B_CELL_ACTIVATION	128	-0.642946	-2.20164	0	0	0
GO_POSITIVE_REGULATION_OF_CELL_CELL_ADHESION	230	-0.619241	-2.19998	0	0	0
GO_NEUROINFLAMMATORY_RESPONSE	54	-0.717978	-2.19262	0	0	0
GO_DEFENSE_RESPONSE_TO_BACTERIUM	174	-0.625103	-2.18818	0	0	0
GO_POSITIVE_REGULATION_OF_NEUROINFLAMMATORY_RESPONSE	17	-0.87073	-2.18657	0	0	0
GO_POSITIVE_REGULATION_OF_T_CELL_PROLIFERATION	84	-0.666297	-2.18569	0	0	0
GO_LEUKOCYTE_MIGRATION	400	-0.598267	-2.17198	0	0	0
GO_REGULATION_OF_LEUKOCYTE_PROLIFERATION	197	-0.61629	-2.16643	0	0	0
GO_GLIAL_CELL_ACTIVATION	45	-0.721971	-2.16596	0	0	0
GO_PRODUCTION_OF_MOLECULAR_MEDIATOR_OF_IMMUNE_RESPONSE	192	-0.616984	-2.16421	0	0	0
GO_LEUKOCYTE_ACTIVATION_INVOLVED_IN_INFLAMMATORY_RESPONSE	37	-0.75243	-2.16364	0	0	0
GO_T_CELL_PROLIFERATION	164	-0.615315	-2.16247	0	0	0
GO_INTERLEUKIN_8_SECRETION	25	-0.805252	-2.15257	0	0	0
GO_CYTOKINE_SECRETION	185	-0.611718	-2.14844	0	0	0
GO_REGULATION_OF_LYMPHOCYTE_ACTIVATION	399	-0.593814	-2.14828	0	0	0
GO_LEUKOCYTE_PROLIFERATION	250	-0.603524	-2.14377	0	0	0
GO_INTERLEUKIN_8_PRODUCTION	63	-0.682666	-2.1431	0	0	0
GO_ACUTE_INFLAMMATORY_RESPONSE	91	-0.656272	-2.13892	0	0	0
GO_LEUKOCYTE_CELL_CELL_ADHESION	301	-0.590467	-2.13358	0	0	0
GO_T_CELL_ACTIVATION	412	-0.587628	-2.13348	0	0	0
GO_REGULATION_OF_ADAPTIVE_IMMUNE_RESPONSE	143	-0.616246	-2.13035	0	0	0
GO_REGULATION_OF_MICROGLIAL_CELL_ACTIVATION	20	-0.822671	-2.12945	0	0	0
GO_POSITIVE_REGULATION_OF_TOLL_LIKE_RECEPTOR_SIGNALING_PATHWAY	21	-0.793874	-2.12531	0	0	0
GO_IMMUNOGLOBULIN_PRODUCTION	108	-0.636286	-2.12526	0	0	0
GO_TUMOR_NECROSIS_FACTOR_BIOSYNTHETIC_PROCESS	22	-0.80379	-2.1208	0	0	0
GO_LEUKOCYTE_MEDIATED_CYTOTOXICITY	93	-0.642584	-2.11921	0	0	0
GO_MEMBRANE_INVAGINATION	85	-0.648625	-2.11862	0	0	0
GO_RESPONSE_TO_BACTERIUM	494	-0.578102	-2.11359	0	0	0
GO_INTERFERON_GAMMA_MEDIATED_SIGNALING_PATHWAY	84	-0.643821	-2.11281	0	0	0
GO_REGULATION_OF_T_CELL_ACTIVATION	286	-0.591432	-2.10898	0	0	0
GO_POSITIVE_REGULATION_OF_INTERLEUKIN_2_PRODUCTION	30	-0.756277	-2.10674	0	0	0
GO_B_CELL_ACTIVATION	226	-0.593788	-2.10594	0	0	0
GO_LYMPHOCYTE_ACTIVATION_INVOLVED_IN_IMMUNE_RESPONSE	142	-0.609486	-2.10224	0	0	0
GO_REGULATION_OF_LEUKOCYTE_MEDIATED_IMMUNITY	179	-0.603588	-2.10058	0	0	0
GO_POSITIVE_REGULATION_OF_LEUKOCYTE_PROLIFERATION	121	-0.622726	-2.09647	0	0	0
GO_POSITIVE_REGULATION_OF_CYTOKINE_PRODUCTION	388	-0.58056	-2.08927	0	1.66454e-05	0.001
GO_ALPHA_BETA_T_CELL_ACTIVATION	125	-0.613639	-2.08843	0	1.63812e-05	0.001
GO_T_CELL_MEDIATED_IMMUNITY	92	-0.631279	-2.08603	0	1.61253e-05	0.001
GO_CD4_POSITIVE_ALPHA_BETA_T_CELL_ACTIVATION	79	-0.643201	-2.08599	0	1.58772e-05	0.001
GO_REGULATION_OF_CYTOKINE_PRODUCTION_INVOLVED_IN_IMMUNE_RESPONSE	79	-0.643531	-2.08575	0	1.56366e-05	0.001
GO_DEFENSE_RESPONSE_TO_OTHER_ORGANISM	379	-0.575233	-2.0837	0	1.54032e-05	0.001
GO_ANTIGEN_RECEPTOR_MEDIATED_SIGNALING_PATHWAY	243	-0.586324	-2.08293	0	1.51767e-05	0.001
GO_REGULATION_OF_MONONUCLEAR_CELL_MIGRATION	40	-0.701141	-2.0819	0	1.49568e-05	0.001
GO_RESPIRATORY_BURST	31	-0.733731	-2.08037	0	1.47431e-05	0.001
GO_IMMUNE_RESPONSE_REGULATING_CELL_SURFACE_RECEPTOR_SIGNALING_PATHWAY	390	-0.576549	-2.07631	0	1.45354e-05	0.001
GO_INTERLEUKIN_10_PRODUCTION	44	-0.693882	-2.07516	0	1.43336e-05	0.001
GO_REGULATION_OF_CD4_POSITIVE_ALPHA_BETA_T_CELL_ACTIVATION	51	-0.678689	-2.07435	0	1.41372e-05	0.001
GO_ACUTE_PHASE_RESPONSE	33	-0.72848	-2.07387	0	1.39462e-05	0.001
GO_NEGATIVE_REGULATION_OF_LYMPHOCYTE_ACTIVATION	126	-0.61406	-2.06894	0	2.74503e-05	0.002
GO_POSITIVE_REGULATION_OF_IMMUNE_EFFECTOR_PROCESS	193	-0.590934	-2.06858	0	2.70891e-05	0.002
GO_REGULATION_OF_LYMPHOCYTE_MEDIATED_IMMUNITY	130	-0.607822	-2.06713	0	2.67373e-05	0.002
GO_REGULATION_OF_CD4_POSITIVE_ALPHA_BETA_T_CELL_DIFFERENTIATION	42	-0.696603	-2.06664	0	2.63945e-05	0.002
GO_EMBRYONIC_SKELETAL_SYSTEM_MORPHOGENESIS	89	-0.623743	-2.06026	0	3.92445e-05	0.003
GO_CELL_KILLING	115	-0.611556	-2.05688	0	5.17015e-05	0.004
GO_NEGATIVE_REGULATION_OF_CYTOKINE_SECRETION	54	-0.663694	-2.05634	0	5.10632e-05	0.004
GO_CELLULAR_RESPONSE_TO_BIOTIC_STIMULUS	200	-0.582492	-2.05315	0	5.04405e-05	0.004
GO_POSITIVE_REGULATION_OF_CYTOKINE_SECRETION	111	-0.605026	-2.045	0	4.98328e-05	0.004
GO_POSITIVE_REGULATION_OF_MACROPHAGE_ACTIVATION	27	-0.743627	-2.04449	0	4.92395e-05	0.004
GO_LYMPHOCYTE_COSTIMULATION	55	-0.662353	-2.04353	0	4.86603e-05	0.004
GO_MONONUCLEAR_CELL_MIGRATION	69	-0.633967	-2.0435	0	4.80944e-05	0.004
GO_REGULATION_OF_MACROPHAGE_ACTIVATION	52	-0.666655	-2.04256	0	4.75416e-05	0.004
GO_REGULATION_OF_ALPHA_BETA_T_CELL_ACTIVATION	85	-0.624752	-2.04252	0	4.70014e-05	0.004
GO_T_CELL_SELECTION	45	-0.678809	-2.04244	0	4.64733e-05	0.004
GO_REGULATION_OF_ANTIGEN_PROCESSING_AND_PRESENTATION	18	-0.80608	-2.04234	0	4.59569e-05	0.004
GO_FC_EPSILON_RECEPTOR_SIGNALING_PATHWAY	127	-0.598969	-2.03921	0	5.6801e-05	0.005
GO_T_CELL_DIFFERENTIATION_INVOLVED_IN_IMMUNE_RESPONSE	60	-0.652038	-2.03777	0	5.61836e-05	0.005
GO_FC_RECEPTOR_SIGNALING_PATHWAY	197	-0.578483	-2.03768	0	5.55795e-05	0.005
GO_POSITIVE_REGULATION_OF_LYMPHOCYTE_MEDIATED_IMMUNITY	92	-0.61407	-2.03737	0	5.49882e-05	0.005
GO_INTERLEUKIN_6_PRODUCTION	117	-0.606615	-2.03684	0	5.44094e-05	0.005
GO_INTERLEUKIN_2_BIOSYNTHETIC_PROCESS	21	-0.772557	-2.03674	0	5.38426e-05	0.005
GO_ALPHA_BETA_T_CELL_DIFFERENTIATION	94	-0.612347	-2.03553	0	5.32876e-05	0.005
GO_POSITIVE_REGULATION_OF_ADAPTIVE_IMMUNE_RESPONSE	91	-0.615109	-2.03549	0	5.27438e-05	0.005
GO_NEGATIVE_REGULATION_OF_CELL_ACTIVATION	168	-0.578844	-2.03341	0	5.22111e-05	0.005
GO_LEUKOCYTE_DIFFERENTIATION	453	-0.55885	-2.02939	0	5.16889e-05	0.005
GO_REGULATION_OF_TOLL_LIKE_RECEPTOR_SIGNALING_PATHWAY	62	-0.64442	-2.02874	0	5.11772e-05	0.005
Table S3C
List of top 100 biological processes negatively associated with 1p/19q codeltion (Codel) in CGGA693 LGG
NAME	SIZE	ES	NES	NOM p-val	FDR q-val	FWER p-val
GO_B_CELL_MEDIATED_IMMUNITY	114	-0.669907	-2.29092	0	0	0
GO_HUMORAL_IMMUNE_RESPONSE_MEDIATED_BY_CIRCULATING_IMMUNOGLOBULIN	55	-0.725701	-2.25391	0	0	0
GO_ADAPTIVE_IMMUNE_RESPONSE_BASED_ON_SOMATIC_RECOMBINATION_OF_IMMUNE_RECEPTORS_BUILT_FROM_IMMUNOGLOBULIN_SUPERFAMILY_DOMAINS	240	-0.622775	-2.22924	0	0	0
GO_POSITIVE_REGULATION_OF_CELL_ACTIVATION	309	-0.604874	-2.20418	0	0	0
GO_LYMPHOCYTE_MEDIATED_IMMUNITY	228	-0.615232	-2.20049	0	0	0
GO_COMPLEMENT_ACTIVATION	67	-0.692001	-2.1997	0	0	0
GO_LYMPHOCYTE_ACTIVATION_INVOLVED_IN_IMMUNE_RESPONSE	142	-0.633034	-2.1997	0	0	0
GO_ADAPTIVE_IMMUNE_RESPONSE	353	-0.606654	-2.19347	0	0	0
GO_POSITIVE_REGULATION_OF_LEUKOCYTE_CELL_CELL_ADHESION	200	-0.611621	-2.19005	0	0	0
GO_POSITIVE_REGULATION_OF_LYMPHOCYTE_ACTIVATION	260	-0.602448	-2.18732	0	0	0
GO_T_CELL_ACTIVATION_INVOLVED_IN_IMMUNE_RESPONSE	77	-0.670538	-2.18578	0	0	0
GO_POSITIVE_REGULATION_OF_INTERFERON_GAMMA_PRODUCTION	56	-0.706819	-2.18215	0	0	0
GO_T_CELL_PROLIFERATION	163	-0.61966	-2.17076	0	0	0
GO_INTERFERON_GAMMA_PRODUCTION	96	-0.64258	-2.16039	0	0	0
GO_PHAGOCYTOSIS_RECOGNITION	28	-0.766959	-2.14217	0	0	0
GO_B_CELL_RECEPTOR_SIGNALING_PATHWAY	70	-0.660952	-2.14214	0	0	0
GO_REGULATION_OF_B_CELL_ACTIVATION	124	-0.624233	-2.13951	0	0	0
GO_REGULATION_OF_ADAPTIVE_IMMUNE_RESPONSE	143	-0.614674	-2.13843	0	0	0
GO_REGULATION_OF_LEUKOCYTE_PROLIFERATION	197	-0.599353	-2.13712	0	0	0
GO_POSITIVE_REGULATION_OF_T_CELL_PROLIFERATION	84	-0.650504	-2.13027	0	0	0
GO_INTERLEUKIN_8_SECRETION	26	-0.775602	-2.12973	0	0	0
GO_POSITIVE_REGULATION_OF_B_CELL_ACTIVATION	81	-0.650193	-2.12535	0	0	0
GO_REGULATION_OF_COAGULATION	71	-0.645101	-2.11835	0	0	0
GO_LEUKOCYTE_PROLIFERATION	249	-0.585453	-2.11599	0	0	0
GO_MEMBRANE_INVAGINATION	80	-0.644862	-2.11454	0	0	0
GO_REGULATION_OF_T_CELL_ACTIVATION	285	-0.580457	-2.1116	0	0	0
GO_REGULATION_OF_IMMUNE_EFFECTOR_PROCESS	353	-0.573341	-2.10947	0	0	0
GO_POSITIVE_REGULATION_OF_CYTOKINE_SECRETION	109	-0.615751	-2.10939	0	0	0
GO_CYTOKINE_METABOLIC_PROCESS	98	-0.632253	-2.10936	0	0	0
GO_REGULATION_OF_LYMPHOCYTE_ACTIVATION	395	-0.572158	-2.10064	0	0	0
GO_LEUKOCYTE_CELL_CELL_ADHESION	300	-0.578324	-2.09763	0	0	0
GO_CYTOKINE_SECRETION	184	-0.587228	-2.09744	0	0	0
GO_REGULATION_OF_LEUKOCYTE_MEDIATED_IMMUNITY	179	-0.590821	-2.09509	0	0	0
GO_ALPHA_BETA_T_CELL_ACTIVATION	125	-0.606896	-2.09043	0	0	0
GO_T_CELL_ACTIVATION	411	-0.569266	-2.08399	0	0	0
GO_RESPONSE_TO_INTERFERON_GAMMA	175	-0.591542	-2.08328	0	0	0
GO_SYNAPSE_PRUNING	10	-0.938087	-2.07808	0	0	0
GO_T_CELL_DIFFERENTIATION_INVOLVED_IN_IMMUNE_RESPONSE	59	-0.653453	-2.06846	0	2.68811e-05	0.001
GO_REGULATION_OF_CD4_POSITIVE_ALPHA_BETA_T_CELL_DIFFERENTIATION	42	-0.681478	-2.06389	0	5.26583e-05	0.002
GO_INTERFERON_GAMMA_MEDIATED_SIGNALING_PATHWAY	81	-0.628776	-2.06083	0	5.13419e-05	0.002
GO_MACROPHAGE_ACTIVATION	77	-0.62971	-2.06069	0	5.00896e-05	0.002
GO_POSITIVE_REGULATION_OF_LEUKOCYTE_DIFFERENTIATION	131	-0.594086	-2.05952	0	4.8897e-05	0.002
GO_NEGATIVE_REGULATION_OF_LEUKOCYTE_PROLIFERATION	72	-0.639715	-2.05832	0	4.77599e-05	0.002
GO_NEGATIVE_REGULATION_OF_ADAPTIVE_IMMUNE_RESPONSE	40	-0.681292	-2.05442	0	4.66744e-05	0.002
GO_T_HELPER_1_TYPE_IMMUNE_RESPONSE	38	-0.704787	-2.05301	0	4.56372e-05	0.002
GO_NEGATIVE_REGULATION_OF_LEUKOCYTE_CELL_CELL_ADHESION	107	-0.598744	-2.05104	0	4.46451e-05	0.002
GO_PHAGOCYTOSIS	249	-0.565488	-2.04896	0	4.36952e-05	0.002
GO_REGULATION_OF_ALPHA_BETA_T_CELL_ACTIVATION	85	-0.620936	-2.048	0	4.27849e-05	0.002
GO_NEGATIVE_REGULATION_OF_LYMPHOCYTE_ACTIVATION	127	-0.599657	-2.0434	0	6.28997e-05	0.003
GO_FC_RECEPTOR_MEDIATED_STIMULATORY_SIGNALING_PATHWAY	89	-0.614309	-2.03676	0	8.21497e-05	0.004
GO_POSITIVE_REGULATION_OF_CELL_CELL_ADHESION	229	-0.569633	-2.03148	0	0.000120973	0.006
GO_REGULATION_OF_LYMPHOCYTE_MEDIATED_IMMUNITY	130	-0.590303	-2.02831	0	0.00013846	0.007
GO_POSITIVE_REGULATION_OF_LEUKOCYTE_PROLIFERATION	121	-0.592536	-2.0276	0	0.000135847	0.007
GO_CD4_POSITIVE_ALPHA_BETA_T_CELL_ACTIVATION	79	-0.617632	-2.02617	0	0.000133331	0.007
GO_MONONUCLEAR_CELL_MIGRATION	69	-0.629762	-2.02578	0	0.000130907	0.007
GO_INTERLEUKIN_10_PRODUCTION	43	-0.677116	-2.01983	0	0.000183713	0.01
GO_GRANULOCYTE_MIGRATION	110	-0.593178	-2.0188	0	0.00018049	0.01
GO_REGULATION_OF_CYTOKINE_PRODUCTION_INVOLVED_IN_IMMUNE_RESPONSE	77	-0.624571	-2.01729	0	0.000177378	0.01
GO_LEUKOCYTE_MIGRATION	384	-0.547179	-2.01653	0	0.000174372	0.01
GO_POSITIVE_REGULATION_OF_B_CELL_DIFFERENTIATION	12	-0.87628	-2.01606	0	0.000188803	0.011
GO_LEUKOCYTE_DIFFERENTIATION	452	-0.544258	-2.01375	0	0.000185707	0.011
GO_REGULATION_OF_T_HELPER_1_TYPE_IMMUNE_RESPONSE	24	-0.75106	-2.01234	0	0.000182712	0.011
GO_POSITIVE_REGULATION_OF_LYMPHOCYTE_DIFFERENTIATION	85	-0.610799	-2.01155	0	0.000179812	0.011
GO_REGULATION_OF_LEUKOCYTE_MIGRATION	173	-0.566373	-2.0113	0	0.000177002	0.011
GO_POSITIVE_REGULATION_OF_INTERLEUKIN_6_PRODUCTION	70	-0.621948	-2.00829	0	0.000174279	0.011
GO_GRANULOCYTE_DIFFERENTIATION	31	-0.706888	-2.00544	0	0.000171639	0.011
GO_POSITIVE_REGULATION_OF_ALPHA_BETA_T_CELL_ACTIVATION	58	-0.639367	-2.00313	0	0.000169077	0.011
GO_TYPE_2_IMMUNE_RESPONSE	31	-0.707624	-2.00291	0	0.000166591	0.011
GO_NEGATIVE_REGULATION_OF_CELL_ACTIVATION	169	-0.571191	-2.00138	0	0.000164176	0.011
GO_REGULATION_OF_NEUROINFLAMMATORY_RESPONSE	28	-0.709072	-2.00076	0	0.000161831	0.011
GO_ACUTE_INFLAMMATORY_RESPONSE	91	-0.599579	-1.99744	0	0.000159551	0.011
GO_POSITIVE_REGULATION_OF_ADAPTIVE_IMMUNE_RESPONSE	91	-0.599764	-1.99299	0	0.000171622	0.012
GO_POSITIVE_REGULATION_OF_CD4_POSITIVE_ALPHA_BETA_T_CELL_ACTIVATION	31	-0.705695	-1.99282	0	0.000169271	0.012
GO_POSITIVE_REGULATION_OF_IMMUNE_EFFECTOR_PROCESS	192	-0.556788	-1.98756	0	0.000166983	0.012
GO_REGULATION_OF_CD4_POSITIVE_ALPHA_BETA_T_CELL_ACTIVATION	51	-0.651156	-1.98746	0	0.000164757	0.012
GO_RESPONSE_TO_BACTERIUM	486	-0.537037	-1.9864	0	0.000176258	0.013
GO_MACROPHAGE_DIFFERENTIATION	37	-0.675806	-1.98545	0	0.000173969	0.013
GO_LEUKOCYTE_ACTIVATION_INVOLVED_IN_INFLAMMATORY_RESPONSE	36	-0.680306	-1.98181	0	0.00019816	0.015
GO_INTERLEUKIN_8_PRODUCTION	64	-0.629597	-1.9813	0	0.000195651	0.015
GO_MYELOID_LEUKOCYTE_DIFFERENTIATION	183	-0.553384	-1.98027	0	0.000193206	0.015
GO_REGULATION_OF_LEUKOCYTE_DIFFERENTIATION	242	-0.550028	-1.97941	0	0.00019082	0.015
GO_REGULATION_OF_ANTIGEN_PROCESSING_AND_PRESENTATION	18	-0.785075	-1.97881	0	0.000188493	0.015
GO_HUMORAL_IMMUNE_RESPONSE	178	-0.560877	-1.97792	0	0.000186222	0.015
GO_B_CELL_ACTIVATION	220	-0.555307	-1.97788	0	0.000184005	0.015
GO_REGULATION_OF_PRODUCTION_OF_MOLECULAR_MEDIATOR_OF_IMMUNE_RESPONSE	127	-0.576534	-1.97744	0	0.000193873	0.016
GO_NEGATIVE_REGULATION_OF_IMMUNE_RESPONSE	121	-0.577722	-1.97609	0	0.000191619	0.016
GO_REGULATION_OF_HUMORAL_IMMUNE_RESPONSE	63	-0.616448	-1.97506	0	0.000201079	0.017
GO_RESPONSE_TO_MOLECULE_OF_BACTERIAL_ORIGIN	293	-0.541378	-1.97406	0	0.000210565	0.018
GO_REGULATION_OF_PHAGOCYTOSIS	81	-0.596306	-1.96887	0	0.00021978	0.019
GO_NEGATIVE_REGULATION_OF_CYTOKINE_PRODUCTION	230	-0.549951	-1.96809	0	0.000217338	0.019
GO_NEUTROPHIL_MIGRATION	91	-0.5899	-1.9676	0	0.000214949	0.019
GO_ALPHA_BETA_T_CELL_DIFFERENTIATION	94	-0.592418	-1.9667	0	0.000212613	0.019
GO_T_CELL_SELECTION	45	-0.647967	-1.9665	0	0.000210327	0.019
GO_POSITIVE_REGULATION_OF_TYPE_2_IMMUNE_RESPONSE	15	-0.807749	-1.9634	0	0.00021901	0.02
GO_REGULATION_OF_MONONUCLEAR_CELL_MIGRATION	40	-0.663177	-1.96313	0	0.000216704	0.02
GO_LEUKOCYTE_CHEMOTAXIS	186	-0.553099	-1.96294	0	0.000214447	0.02
GO_B_CELL_PROLIFERATION	71	-0.61085	-1.96164	0	0.000254403	0.024
GO_MYELOID_LEUKOCYTE_MIGRATION	170	-0.556758	-1.96161	0	0.000251807	0.024
GO_INTERLEUKIN_6_PRODUCTION	117	-0.579946	-1.96116	0	0.000259693	0.025
GO_POSITIVE_REGULATION_OF_CYTOKINE_PRODUCTION	385	-0.533393	-1.96099	0	0.000257096	0.025
Table S3D
List of top 10 common biological processes negatively associated with 1p/19q codeltion (Codel) of all three LGG datasets
NAME
GO_CYTOKINE_METABOLIC_PROCESS
GO_REGULATION_OF_LEUKOCYTE_PROLIFERATION
GO_ADAPTIVE_IMMUNE_RESPONSE_BASED_ON_SOMATIC_RECOMBINATION_OF_IMMUNE_RECEPTORS_BUILT_FROM_IMMUNOGLOBULIN_SUPERFAMILY_DOMAINS
GO_ADAPTIVE_IMMUNE_RESPONSE
GO_LEUKOCYTE_PROLIFERATION
GO_T_CELL_PROLIFERATION
GO_POSITIVE_REGULATION_OF_T_CELL_PROLIFERATION
GO_POSITIVE_REGULATION_OF_LEUKOCYTE_CELL_CELL_ADHESION
GO_T_CELL_ACTIVATION_INVOLVED_IN_IMMUNE_RESPONSE
GO_INTERFERON_GAMMA_PRODUCTION
ES: Enrichment Score
NES: Normalized Enrichment Score
