# Supplementary material for: Effects of 1p/19q Codeletion on Immune Phenotype in Low Grade Glioma
Source: Front Cell Neurosci. 2021 Jul 16;15:704344. doi: 10.3389/fncel.2021.704344 (PMC8322528; doi:10.3389/fncel.2021.704344)
Supplement: Supplementary Table 4 — List of biological processes negatively associated with 1p/19q codeletion in muIDH LGGs of all three LGG datasets. [file Table_4.XLSX]

## Sheet: Table S4
Table S4A
List of top 100 biological processes negatively associated with 1p/19q codel in muIDH LGGs of TCGA LGG
NAME	SIZE	ES	NES	NOM p-val	FDR q-val	FWER p-val
GO_POSITIVE_REGULATION_OF_CYTOKINE_BIOSYNTHETIC_PROCESS	61	-0.80217	-2.461	0	0	0
GO_CYTOKINE_METABOLIC_PROCESS	110	-0.719768	-2.42049	0	0	0
GO_REGULATION_OF_LEUKOCYTE_PROLIFERATION	211	-0.647654	-2.37218	0	0	0
GO_POSITIVE_REGULATION_OF_CYTOKINE_PRODUCTION	422	-0.604445	-2.35534	0	0	0
GO_RESPONSE_TO_INTERFERON_GAMMA	192	-0.645228	-2.34943	0	0	0
GO_INTERLEUKIN_1_PRODUCTION	90	-0.70831	-2.33951	0	0	0
GO_T_CELL_PROLIFERATION	174	-0.659453	-2.33936	0	0	0
GO_POSITIVE_REGULATION_OF_T_CELL_PROLIFERATION	92	-0.706202	-2.3277	0	0	0
GO_ADAPTIVE_IMMUNE_RESPONSE	381	-0.598324	-2.31664	0	0	0
GO_INTERLEUKIN_1_BETA_PRODUCTION	77	-0.726135	-2.31501	0	0	0
GO_LEUKOCYTE_PROLIFERATION	281	-0.613919	-2.30955	0	0	0
GO_POSITIVE_REGULATION_OF_LEUKOCYTE_CELL_CELL_ADHESION	209	-0.628745	-2.29917	0	0	0
GO_CELLULAR_RESPONSE_TO_BIOTIC_STIMULUS	211	-0.632806	-2.29886	0	0	0
GO_ADAPTIVE_IMMUNE_RESPONSE_BASED_ON_SOMATIC_RECOMBINATION_OF_IMMUNE_RECEPTORS_BUILT_FROM_IMMUNOGLOBULIN_SUPERFAMILY_DOMAINS	246	-0.616799	-2.29765	0	0	0
GO_INTERFERON_GAMMA_PRODUCTION	104	-0.681209	-2.28616	0	0	0
GO_POSITIVE_REGULATION_OF_CELL_ACTIVATION	307	-0.603748	-2.28569	0	0	0
GO_INTERFERON_GAMMA_MEDIATED_SIGNALING_PATHWAY	87	-0.697358	-2.28003	0	0	0
GO_REGULATION_OF_ADAPTIVE_IMMUNE_RESPONSE	155	-0.643248	-2.27759	0	0	0
GO_T_CELL_ACTIVATION_INVOLVED_IN_IMMUNE_RESPONSE	98	-0.689114	-2.26634	0	0	0
GO_INTERLEUKIN_8_PRODUCTION	69	-0.729348	-2.25111	0	0	0
GO_POSITIVE_REGULATION_OF_CYTOKINE_SECRETION	126	-0.650526	-2.24679	0	0	0
GO_POSITIVE_REGULATION_OF_LEUKOCYTE_PROLIFERATION	132	-0.648795	-2.24391	0	0	0
GO_CYTOKINE_SECRETION	206	-0.613615	-2.2361	0	0	0
GO_LIPOPOLYSACCHARIDE_MEDIATED_SIGNALING_PATHWAY	55	-0.730012	-2.231	0	0	0
GO_T_CELL_ACTIVATION	443	-0.576887	-2.2307	0	0	0
GO_LEUKOCYTE_CELL_CELL_ADHESION	316	-0.586861	-2.23013	0	0	0
GO_MACROPHAGE_ACTIVATION	82	-0.683035	-2.22918	0	0	0
GO_INTERLEUKIN_1_SECRETION	55	-0.722795	-2.21931	0	0	0
GO_POSITIVE_REGULATION_OF_LYMPHOCYTE_ACTIVATION	256	-0.596121	-2.21921	0	0	0
GO_LYMPHOCYTE_MEDIATED_IMMUNITY	237	-0.600735	-2.2177	0	0	0
GO_POSITIVE_REGULATION_OF_INTERLEUKIN_8_PRODUCTION	46	-0.755032	-2.21712	0	0	0
GO_LYMPHOCYTE_ACTIVATION_INVOLVED_IN_IMMUNE_RESPONSE	169	-0.620416	-2.20864	0	0	0
GO_POSITIVE_REGULATION_OF_INTERLEUKIN_6_PRODUCTION	78	-0.695074	-2.20788	0	0	0
GO_INTERLEUKIN_1_BETA_SECRETION	48	-0.748436	-2.20596	0	0	0
GO_POSITIVE_REGULATION_OF_INTERFERON_GAMMA_PRODUCTION	62	-0.711828	-2.20537	0	0	0
GO_NEUROINFLAMMATORY_RESPONSE	55	-0.719759	-2.20121	0	0	0
GO_POSITIVE_REGULATION_OF_ADAPTIVE_IMMUNE_RESPONSE	99	-0.662499	-2.19007	0	0	0
GO_INTERLEUKIN_6_PRODUCTION	127	-0.638558	-2.18518	0	0	0
GO_CHEMOKINE_PRODUCTION	79	-0.66915	-2.18473	0	0	0
GO_REGULATION_OF_CYTOKINE_PRODUCTION_INVOLVED_IN_IMMUNE_RESPONSE	83	-0.678785	-2.18231	0	0	0
GO_REGULATION_OF_IMMUNE_EFFECTOR_PROCESS	374	-0.567737	-2.17988	0	0	0
GO_REGULATION_OF_CD4_POSITIVE_ALPHA_BETA_T_CELL_DIFFERENTIATION	46	-0.736499	-2.17936	0	0	0
GO_POSITIVE_REGULATION_OF_IMMUNE_EFFECTOR_PROCESS	204	-0.593819	-2.17151	0	0	0
GO_REGULATION_OF_T_CELL_ACTIVATION	300	-0.570697	-2.16266	0	0	0
GO_B_CELL_MEDIATED_IMMUNITY	109	-0.637165	-2.15181	0	0	0
GO_ALPHA_BETA_T_CELL_ACTIVATION	133	-0.619979	-2.14884	0	0	0
GO_REGULATION_OF_CD4_POSITIVE_ALPHA_BETA_T_CELL_ACTIVATION	56	-0.698882	-2.14651	0	0	0
GO_NEGATIVE_REGULATION_OF_LYMPHOCYTE_ACTIVATION	136	-0.615607	-2.14394	0	0	0
GO_TUMOR_NECROSIS_FACTOR_BIOSYNTHETIC_PROCESS	23	-0.84641	-2.14168	0	0	0
GO_T_HELPER_1_TYPE_IMMUNE_RESPONSE	41	-0.749646	-2.14037	0	0	0
GO_REGULATION_OF_LYMPHOCYTE_ACTIVATION	398	-0.553741	-2.13996	0	0	0
GO_REGULATION_OF_LEUKOCYTE_MEDIATED_IMMUNITY	194	-0.586867	-2.13691	0	0	0
GO_POSITIVE_REGULATION_OF_CHEMOKINE_PRODUCTION	52	-0.707719	-2.13624	0	0	0
GO_LEUKOCYTE_DIFFERENTIATION	488	-0.540212	-2.13411	0	0	0
GO_POSITIVE_REGULATION_OF_CELL_CELL_ADHESION	241	-0.575316	-2.13371	0	0	0
GO_CD4_POSITIVE_ALPHA_BETA_T_CELL_ACTIVATION	85	-0.654397	-2.13315	0	0	0
GO_PATTERN_RECOGNITION_RECEPTOR_SIGNALING_PATHWAY	179	-0.595591	-2.12806	0	0	0
GO_NEGATIVE_REGULATION_OF_LEUKOCYTE_PROLIFERATION	76	-0.658756	-2.12748	0	0	0
GO_RESPONSE_TO_MOLECULE_OF_BACTERIAL_ORIGIN	317	-0.561162	-2.12689	0	0	0
GO_POSITIVE_REGULATION_OF_LEUKOCYTE_DIFFERENTIATION	137	-0.61315	-2.1253	0	1.99394e-05	0.001
GO_GLIAL_CELL_ACTIVATION	44	-0.723145	-2.11765	0	1.96126e-05	0.001
GO_INTERLEUKIN_6_BIOSYNTHETIC_PROCESS	22	-0.830397	-2.11741	0	1.92962e-05	0.001
GO_TOLL_LIKE_RECEPTOR_SIGNALING_PATHWAY	134	-0.608559	-2.11708	0	1.89899e-05	0.001
GO_MONONUCLEAR_CELL_MIGRATION	84	-0.648592	-2.1134	0	3.80813e-05	0.002
GO_DEFENSE_RESPONSE_TO_OTHER_ORGANISM	453	-0.536652	-2.11204	0	3.74954e-05	0.002
GO_REGULATION_OF_INNATE_IMMUNE_RESPONSE	414	-0.541194	-2.11126	0	3.69273e-05	0.002
GO_B_CELL_PROLIFERATION	91	-0.640488	-2.11004	0	3.63762e-05	0.002
GO_POSITIVE_REGULATION_OF_HEMOPOIESIS	172	-0.596397	-2.10909	0	3.58412e-05	0.002
GO_REGULATION_OF_B_CELL_PROLIFERATION	59	-0.680794	-2.10687	0	3.53218e-05	0.002
GO_HUMORAL_IMMUNE_RESPONSE_MEDIATED_BY_CIRCULATING_IMMUNOGLOBULIN	45	-0.708333	-2.10102	0	3.48172e-05	0.002
GO_TUMOR_NECROSIS_FACTOR_SUPERFAMILY_CYTOKINE_PRODUCTION	136	-0.600588	-2.09983	0	3.43268e-05	0.002
GO_CELL_KILLING	153	-0.586513	-2.09402	0	3.385e-05	0.002
GO_POSITIVE_REGULATION_OF_INTERLEUKIN_1_PRODUCTION	48	-0.715141	-2.09311	0	3.33863e-05	0.002
GO_TYPE_I_INTERFERON_PRODUCTION	120	-0.612896	-2.0901	0	3.29352e-05	0.002
GO_MYD88_DEPENDENT_TOLL_LIKE_RECEPTOR_SIGNALING_PATHWAY	36	-0.747944	-2.09007	0	3.2496e-05	0.002
GO_POSITIVE_REGULATION_OF_LYMPHOCYTE_DIFFERENTIATION	90	-0.640844	-2.08679	0	3.20685e-05	0.002
GO_POSITIVE_REGULATION_OF_TUMOR_NECROSIS_FACTOR_SUPERFAMILY_CYTOKINE_PRODUCTION	79	-0.650193	-2.0852	0	3.1652e-05	0.002
GO_POSITIVE_REGULATION_OF_MACROPHAGE_ACTIVATION	27	-0.787354	-2.08489	0	3.12462e-05	0.002
GO_MYELOID_LEUKOCYTE_DIFFERENTIATION	192	-0.575176	-2.08352	0	3.08507e-05	0.002
GO_REGULATION_OF_B_CELL_ACTIVATION	113	-0.611392	-2.08175	0	4.57396e-05	0.003
GO_CYTOKINE_SECRETION_INVOLVED_IN_IMMUNE_RESPONSE	19	-0.851603	-2.08114	0	4.51749e-05	0.003
GO_LEUKOCYTE_ACTIVATION_INVOLVED_IN_INFLAMMATORY_RESPONSE	36	-0.738701	-2.08098	0	4.4624e-05	0.003
GO_INTERFERON_BETA_PRODUCTION	49	-0.707097	-2.07769	0	4.40864e-05	0.003
GO_REGULATION_OF_RESPONSE_TO_CYTOKINE_STIMULUS	157	-0.58077	-2.07716	0	4.35615e-05	0.003
GO_CELLULAR_DEFENSE_RESPONSE	52	-0.698965	-2.07408	0	4.3049e-05	0.003
GO_DEFENSE_RESPONSE_TO_BACTERIUM	228	-0.56269	-2.07399	0	4.25485e-05	0.003
GO_REGULATION_OF_LEUKOCYTE_DIFFERENTIATION	255	-0.556509	-2.07138	0	4.20594e-05	0.003
GO_REGULATION_OF_ALPHA_BETA_T_CELL_ACTIVATION	90	-0.627745	-2.07103	0	4.15814e-05	0.003
GO_INTERFERON_ALPHA_PRODUCTION	30	-0.76422	-2.06889	0	4.11142e-05	0.003
GO_NEGATIVE_REGULATION_OF_CYTOKINE_PRODUCTION	245	-0.552386	-2.06742	0	4.06574e-05	0.003
GO_REGULATION_OF_LYMPHOCYTE_MEDIATED_IMMUNITY	145	-0.586721	-2.06411	0	5.34984e-05	0.004
GO_CYTOKINE_PRODUCTION_INVOLVED_IN_IMMUNE_RESPONSE	99	-0.618069	-2.06397	0	5.29169e-05	0.004
GO_POSITIVE_REGULATION_OF_LEUKOCYTE_MEDIATED_IMMUNITY	127	-0.589725	-2.05954	0	7.84445e-05	0.006
GO_NEGATIVE_REGULATION_OF_TYPE_I_INTERFERON_PRODUCTION	41	-0.708933	-2.05778	0	7.761e-05	0.006
GO_T_CELL_DIFFERENTIATION_INVOLVED_IN_IMMUNE_RESPONSE	64	-0.669472	-2.05347	0	7.6793e-05	0.006
GO_ACTIVATION_OF_INNATE_IMMUNE_RESPONSE	294	-0.542152	-2.05029	0	7.59931e-05	0.006
GO_LEUKOCYTE_MEDIATED_CYTOTOXICITY	104	-0.607631	-2.04604	0	7.52097e-05	0.006
GO_SUPEROXIDE_ANION_GENERATION	33	-0.749634	-2.04421	0	7.44422e-05	0.006
GO_POSITIVE_REGULATION_OF_LYMPHOCYTE_MEDIATED_IMMUNITY	100	-0.609713	-2.04348	0	7.36903e-05	0.006
GO_POSITIVE_REGULATION_OF_CYTOKINE_PRODUCTION_INVOLVED_IN_IMMUNE_RESPONSE	53	-0.680989	-2.04115	0	9.71786e-05	0.008
Table S4B
List of top 100 biological processes negatively associated with 1p/19q codel in muIDH LGGs of CGGA325 LGG
NAME	SIZE	ES	NES	NOM p-val	FDR q-val	FWER p-val
GO_HUMORAL_IMMUNE_RESPONSE_MEDIATED_BY_CIRCULATING_IMMUNOGLOBULIN	74	-0.786698	-2.55103	0	0	0
GO_REGULATION_OF_HUMORAL_IMMUNE_RESPONSE	80	-0.759748	-2.49852	0	0	0
GO_COMPLEMENT_ACTIVATION	84	-0.756303	-2.48992	0	0	0
GO_B_CELL_MEDIATED_IMMUNITY	133	-0.670072	-2.31238	0	0	0
GO_LYMPHOCYTE_MEDIATED_IMMUNITY	248	-0.636874	-2.29301	0	0	0
GO_ADAPTIVE_IMMUNE_RESPONSE_BASED_ON_SOMATIC_RECOMBINATION_OF_IMMUNE_RECEPTORS_BUILT_FROM_IMMUNOGLOBULIN_SUPERFAMILY_DOMAINS	260	-0.629331	-2.28134	0	0	0
GO_PHAGOCYTOSIS_RECOGNITION	33	-0.78007	-2.25088	0	0	0
GO_ADAPTIVE_IMMUNE_RESPONSE	377	-0.611748	-2.24007	0	0	0
GO_FC_RECEPTOR_MEDIATED_STIMULATORY_SIGNALING_PATHWAY	106	-0.658332	-2.23934	0	0	0
GO_B_CELL_RECEPTOR_SIGNALING_PATHWAY	75	-0.688325	-2.22768	0	0	0
GO_CYTOKINE_METABOLIC_PROCESS	99	-0.664907	-2.21967	0	0	0
GO_POSITIVE_REGULATION_OF_CYTOKINE_BIOSYNTHETIC_PROCESS	55	-0.713094	-2.215	0	0	0
GO_INTERLEUKIN_8_SECRETION	25	-0.806285	-2.20583	0	0	0
GO_POSITIVE_REGULATION_OF_B_CELL_ACTIVATION	86	-0.662318	-2.20492	0	0	0
GO_T_CELL_ACTIVATION_INVOLVED_IN_IMMUNE_RESPONSE	78	-0.674927	-2.19685	0	0	0
GO_INTERFERON_GAMMA_PRODUCTION	95	-0.652939	-2.18711	0	0	0
GO_REGULATION_OF_IMMUNE_EFFECTOR_PROCESS	370	-0.592915	-2.18309	0	0	0
GO_HUMORAL_IMMUNE_RESPONSE	195	-0.615266	-2.18132	0	0	0
GO_POSITIVE_REGULATION_OF_CELL_ACTIVATION	317	-0.583619	-2.13157	0	0.000109477	0.002
GO_PHAGOCYTOSIS	266	-0.586435	-2.13072	0	0.000104003	0.002
GO_DEFENSE_RESPONSE_TO_BACTERIUM	174	-0.601266	-2.12711	0	9.90502e-05	0.002
GO_NEUROINFLAMMATORY_RESPONSE	54	-0.683204	-2.12157	0	9.45479e-05	0.002
GO_POSITIVE_REGULATION_OF_INTERFERON_GAMMA_PRODUCTION	56	-0.680676	-2.11942	0	9.04372e-05	0.002
GO_REGULATION_OF_LEUKOCYTE_MEDIATED_IMMUNITY	179	-0.591106	-2.10726	0	8.6669e-05	0.002
GO_POSITIVE_REGULATION_OF_T_CELL_PROLIFERATION	84	-0.629512	-2.10702	0	8.32022e-05	0.002
GO_POSITIVE_REGULATION_OF_LEUKOCYTE_CELL_CELL_ADHESION	201	-0.59271	-2.10449	0	8.00021e-05	0.002
GO_MACROPHAGE_ACTIVATION	78	-0.642238	-2.10189	0	7.70391e-05	0.002
GO_MEMBRANE_INVAGINATION	85	-0.63303	-2.09647	0	7.42877e-05	0.002
GO_POSITIVE_REGULATION_OF_LYMPHOCYTE_ACTIVATION	266	-0.576966	-2.09263	0	7.1726e-05	0.002
GO_REGULATION_OF_CYTOKINE_PRODUCTION_INVOLVED_IN_IMMUNE_RESPONSE	79	-0.634829	-2.09166	0	6.93352e-05	0.002
GO_REGULATION_OF_LYMPHOCYTE_MEDIATED_IMMUNITY	130	-0.601984	-2.08946	0	6.70985e-05	0.002
GO_EMBRYONIC_SKELETAL_SYSTEM_DEVELOPMENT	119	-0.605552	-2.08805	0	6.50017e-05	0.002
GO_EMBRYONIC_SKELETAL_SYSTEM_MORPHOGENESIS	89	-0.624173	-2.08724	0	6.3032e-05	0.002
GO_REGULATION_OF_ADAPTIVE_IMMUNE_RESPONSE	143	-0.596439	-2.08617	0	6.11781e-05	0.002
GO_REGULATION_OF_NEUROINFLAMMATORY_RESPONSE	29	-0.744681	-2.08334	0	5.94301e-05	0.002
GO_INTERLEUKIN_8_PRODUCTION	63	-0.657124	-2.08088	0	5.77793e-05	0.002
GO_T_CELL_PROLIFERATION	164	-0.582144	-2.07742	0	5.62177e-05	0.002
GO_POSITIVE_REGULATION_OF_IMMUNE_EFFECTOR_PROCESS	193	-0.580692	-2.06824	0	5.47383e-05	0.002
GO_POSITIVE_REGULATION_OF_ADAPTIVE_IMMUNE_RESPONSE	91	-0.615028	-2.06242	0	0.00010677	0.004
GO_REGULATION_OF_B_CELL_ACTIVATION	128	-0.599678	-2.06204	0	0.0001041	0.004
GO_T_CELL_DIFFERENTIATION_INVOLVED_IN_IMMUNE_RESPONSE	60	-0.651785	-2.05851	0	0.00012677	0.005
GO_INTERLEUKIN_2_PRODUCTION	62	-0.65101	-2.05396	0	0.000148373	0.006
GO_POSITIVE_REGULATION_OF_LYMPHOCYTE_MEDIATED_IMMUNITY	92	-0.612093	-2.05105	0	0.000144923	0.006
GO_LIPOPOLYSACCHARIDE_MEDIATED_SIGNALING_PATHWAY	54	-0.659306	-2.05021	0	0.000141629	0.006
GO_POSITIVE_REGULATION_OF_LEUKOCYTE_MEDIATED_IMMUNITY	119	-0.593477	-2.04558	0	0.000138482	0.006
GO_FC_EPSILON_RECEPTOR_SIGNALING_PATHWAY	127	-0.586535	-2.04463	0	0.000135471	0.006
GO_LEUKOCYTE_ACTIVATION_INVOLVED_IN_INFLAMMATORY_RESPONSE	37	-0.703279	-2.04442	0	0.000132589	0.006
GO_LEUKOCYTE_MIGRATION	400	-0.557037	-2.04301	0	0.000129827	0.006
GO_POSITIVE_REGULATION_OF_INTERLEUKIN_2_PRODUCTION	30	-0.729827	-2.04224	0	0.000148274	0.007
GO_PRODUCTION_OF_MOLECULAR_MEDIATOR_OF_IMMUNE_RESPONSE	192	-0.573467	-2.04215	0	0.000145308	0.007
GO_GLIAL_CELL_ACTIVATION	45	-0.673793	-2.04083	0	0.000142459	0.007
GO_CELLULAR_DEFENSE_RESPONSE	46	-0.669029	-2.04004	0	0.000139719	0.007
GO_CYTOKINE_SECRETION	185	-0.574382	-2.03841	0	0.000156441	0.008
GO_POSITIVE_REGULATION_OF_NEUROINFLAMMATORY_RESPONSE	17	-0.790053	-2.03318	0	0.000153543	0.008
GO_POSITIVE_REGULATION_OF_TOLL_LIKE_RECEPTOR_SIGNALING_PATHWAY	21	-0.774785	-2.03246	0	0.000169571	0.009
GO_MONONUCLEAR_CELL_MIGRATION	69	-0.630551	-2.03205	0	0.000166543	0.009
GO_INTERLEUKIN_2_BIOSYNTHETIC_PROCESS	21	-0.775062	-2.03033	0	0.000163622	0.009
GO_POSITIVE_REGULATION_OF_INTERLEUKIN_8_SECRETION	14	-0.843835	-2.02107	0	0.000214211	0.012
GO_POSITIVE_REGULATION_OF_CYTOKINE_PRODUCTION	388	-0.544382	-2.02015	0	0.00021058	0.012
GO_REGULATION_OF_MONONUCLEAR_CELL_MIGRATION	40	-0.673462	-2.01886	0	0.000207071	0.012
GO_LEUKOCYTE_PROLIFERATION	250	-0.556407	-2.01777	0	0.000203676	0.012
GO_REGULATION_OF_LEUKOCYTE_PROLIFERATION	197	-0.563541	-2.01774	0	0.000200391	0.012
GO_FIBRINOLYSIS	19	-0.792828	-2.01483	0	0.000246366	0.015
GO_IMMUNOGLOBULIN_PRODUCTION	108	-0.59021	-2.01303	0	0.000242517	0.015
GO_RESPONSE_TO_BACTERIUM	494	-0.541147	-2.01264	0	0.000238786	0.015
GO_IMMUNE_RESPONSE_REGULATING_CELL_SURFACE_RECEPTOR_SIGNALING_PATHWAY	390	-0.548106	-2.01078	0	0.000235168	0.015
GO_REGULATION_OF_LYMPHOCYTE_ACTIVATION	399	-0.542712	-2.00881	0	0.000231658	0.015
GO_LYMPHOCYTE_ACTIVATION_INVOLVED_IN_IMMUNE_RESPONSE	142	-0.578242	-2.00729	0	0.00025844	0.017
GO_TUMOR_NECROSIS_FACTOR_BIOSYNTHETIC_PROCESS	22	-0.748274	-2.0038	0	0.000284476	0.019
GO_CELLULAR_RESPONSE_TO_BIOTIC_STIMULUS	200	-0.555429	-2.00122	0	0.000310195	0.021
GO_T_CELL_ACTIVATION	412	-0.542313	-2.00092	0	0.000305826	0.021
GO_LEUKOCYTE_MEDIATED_CYTOTOXICITY	93	-0.601318	-1.99685	0	0.000301578	0.021
GO_POSITIVE_REGULATION_OF_LEUKOCYTE_PROLIFERATION	121	-0.578534	-1.99578	0	0.000311563	0.022
GO_FC_RECEPTOR_SIGNALING_PATHWAY	197	-0.558638	-1.99386	0	0.000307353	0.022
GO_REGULATION_OF_COAGULATION	69	-0.625967	-1.99204	0	0.00034458	0.025
GO_T_CELL_MEDIATED_IMMUNITY	92	-0.598408	-1.98967	0	0.000380959	0.028
GO_REGULATION_OF_PRODUCTION_OF_MOLECULAR_MEDIATOR_OF_IMMUNE_RESPONSE	128	-0.57011	-1.98912	0	0.000376011	0.028
GO_POSITIVE_REGULATION_OF_INTERLEUKIN_2_BIOSYNTHETIC_PROCESS	13	-0.83495	-1.98775	0	0.00037119	0.028
GO_POSITIVE_REGULATION_OF_INTERLEUKIN_6_PRODUCTION	71	-0.618499	-1.98555	0	0.000366492	0.028
GO_REGULATION_OF_T_CELL_ACTIVATION	286	-0.542823	-1.98384	0	0.000374685	0.029
GO_CD4_POSITIVE_ALPHA_BETA_T_CELL_ACTIVATION	79	-0.607062	-1.98239	0	0.000382958	0.03
GO_POSITIVE_REGULATION_OF_CELL_CELL_ADHESION	230	-0.551643	-1.98147	0	0.000378288	0.03
GO_REGULATION_OF_CD4_POSITIVE_ALPHA_BETA_T_CELL_DIFFERENTIATION	42	-0.66513	-1.98061	0	0.00037373	0.03
GO_ALPHA_BETA_T_CELL_ACTIVATION	125	-0.572596	-1.97969	0	0.000369281	0.03
GO_POSITIVE_REGULATION_OF_MONONUCLEAR_CELL_MIGRATION	20	-0.754687	-1.97939	0	0.000364937	0.03
GO_REGULATION_OF_CD4_POSITIVE_ALPHA_BETA_T_CELL_ACTIVATION	51	-0.635614	-1.97768	0	0.000384924	0.032
GO_PERIPHERAL_NERVOUS_SYSTEM_NEURON_DIFFERENTIATION	11	-0.863505	-1.97646	0	0.0003805	0.032
GO_RESPONSE_TO_MOLECULE_OF_BACTERIAL_ORIGIN	296	-0.53415	-1.9746	0	0.000399689	0.034
GO_LEUKOCYTE_CELL_CELL_ADHESION	301	-0.537488	-1.97449	0	0.000395199	0.034
GO_POSITIVE_REGULATION_OF_MACROPHAGE_ACTIVATION	27	-0.710524	-1.97425	0	0.000402293	0.035
GO_DEFENSE_RESPONSE_TO_OTHER_ORGANISM	379	-0.53258	-1.96943	0	0.000466525	0.041
GO_INTERLEUKIN_1_PRODUCTION	78	-0.600082	-1.96813	0	0.000472636	0.042
GO_INTERLEUKIN_1_BETA_PRODUCTION	66	-0.614115	-1.96513	0	0.000467554	0.042
GO_ACUTE_INFLAMMATORY_RESPONSE	91	-0.600517	-1.96401	0	0.00047359	0.043
GO_MONOCYTE_CHEMOTAXIS	49	-0.636535	-1.96363	0	0.000490429	0.045
GO_POSITIVE_REGULATION_OF_CYTOKINE_SECRETION	111	-0.575858	-1.96123	0	0.000517874	0.048
GO_B_CELL_ACTIVATION	226	-0.545207	-1.9602	0	0.000533961	0.05
GO_REGULATION_OF_MEGAKARYOCYTE_DIFFERENTIATION	68	-0.609006	-1.95726	0	0.000539083	0.05
GO_POSITIVE_REGULATION_OF_INTERLEUKIN_8_PRODUCTION	40	-0.65331	-1.95336	0	0.00057543	0.054
GO_NATURAL_KILLER_CELL_MEDIATED_IMMUNITY	55	-0.628928	-1.9527	0	0.000590418	0.056
Table S4C
List of top 100 biological processes negatively associated with 1p/19q codel in muIDH LGGs of CGGA693 LGG
NAME	SIZE	ES	NES	NOM p-val	FDR q-val	FWER p-val
GO_LYMPHOCYTE_ACTIVATION_INVOLVED_IN_IMMUNE_RESPONSE	142	-0.622941	-2.22147	0	0	0
GO_B_CELL_MEDIATED_IMMUNITY	114	-0.641154	-2.21653	0	0	0
GO_ADAPTIVE_IMMUNE_RESPONSE	353	-0.588321	-2.19729	0	0	0
GO_T_CELL_ACTIVATION_INVOLVED_IN_IMMUNE_RESPONSE	77	-0.661969	-2.1891	0	0	0
GO_REGULATION_OF_LEUKOCYTE_PROLIFERATION	197	-0.600151	-2.18555	0	0	0
GO_T_CELL_PROLIFERATION	163	-0.614525	-2.18307	0	0	0
GO_ADAPTIVE_IMMUNE_RESPONSE_BASED_ON_SOMATIC_RECOMBINATION_OF_IMMUNE_RECEPTORS_BUILT_FROM_IMMUNOGLOBULIN_SUPERFAMILY_DOMAINS	240	-0.59619	-2.18117	0	0	0
GO_HUMORAL_IMMUNE_RESPONSE_MEDIATED_BY_CIRCULATING_IMMUNOGLOBULIN	55	-0.685187	-2.17883	0	0	0
GO_POSITIVE_REGULATION_OF_CELL_ACTIVATION	309	-0.586988	-2.17579	0	0	0
GO_LYMPHOCYTE_MEDIATED_IMMUNITY	228	-0.589479	-2.16584	0	0	0
GO_POSITIVE_REGULATION_OF_T_CELL_PROLIFERATION	84	-0.64123	-2.15701	0	0	0
GO_POSITIVE_REGULATION_OF_CYTOKINE_SECRETION	109	-0.619346	-2.15615	0	0	0
GO_CYTOKINE_SECRETION	184	-0.591397	-2.14932	0	0	0
GO_POSITIVE_REGULATION_OF_LYMPHOCYTE_ACTIVATION	260	-0.577091	-2.14676	0	0	0
GO_POSITIVE_REGULATION_OF_LEUKOCYTE_CELL_CELL_ADHESION	200	-0.588983	-2.14456	0	0	0
GO_MACROPHAGE_ACTIVATION	77	-0.643772	-2.14342	0	0	0
GO_LEUKOCYTE_PROLIFERATION	249	-0.578071	-2.13971	0	0	0
GO_POSITIVE_REGULATION_OF_INTERFERON_GAMMA_PRODUCTION	56	-0.679482	-2.13435	0	0	0
GO_REGULATION_OF_CYTOKINE_PRODUCTION_INVOLVED_IN_IMMUNE_RESPONSE	77	-0.636208	-2.12667	0	0	0
GO_POSITIVE_REGULATION_OF_B_CELL_ACTIVATION	81	-0.634981	-2.12389	0	0	0
GO_CYTOKINE_METABOLIC_PROCESS	98	-0.615944	-2.12287	0	0	0
GO_MONONUCLEAR_CELL_MIGRATION	69	-0.640551	-2.12218	0	0	0
GO_COMPLEMENT_ACTIVATION	67	-0.644777	-2.11889	0	0	0
GO_INTERFERON_GAMMA_PRODUCTION	96	-0.620694	-2.11881	0	0	0
GO_T_HELPER_1_TYPE_IMMUNE_RESPONSE	38	-0.709767	-2.11425	0	0	0
GO_SYNAPSE_PRUNING	10	-0.950855	-2.10608	0	0	0
GO_INTERLEUKIN_10_PRODUCTION	43	-0.683255	-2.09163	0	0	0
GO_B_CELL_RECEPTOR_SIGNALING_PATHWAY	70	-0.63687	-2.08154	0	7.40234e-05	0.002
GO_REGULATION_OF_IMMUNE_EFFECTOR_PROCESS	353	-0.551044	-2.08022	0	7.14709e-05	0.002
GO_T_CELL_ACTIVATION	411	-0.547856	-2.07054	0	6.90885e-05	0.002
GO_NEUROINFLAMMATORY_RESPONSE	53	-0.661737	-2.06981	0	6.68598e-05	0.002
GO_ALPHA_BETA_T_CELL_ACTIVATION	125	-0.593651	-2.06548	0	6.47705e-05	0.002
GO_POSITIVE_REGULATION_OF_LEUKOCYTE_PROLIFERATION	121	-0.587182	-2.06243	0	6.28077e-05	0.002
GO_MEMBRANE_INVAGINATION	80	-0.619087	-2.05961	0	6.09604e-05	0.002
GO_INTERLEUKIN_8_PRODUCTION	64	-0.640028	-2.059	0	5.92187e-05	0.002
GO_REGULATION_OF_ADAPTIVE_IMMUNE_RESPONSE	143	-0.584067	-2.05851	0	5.75737e-05	0.002
GO_LEUKOCYTE_ACTIVATION_INVOLVED_IN_INFLAMMATORY_RESPONSE	36	-0.699264	-2.05815	0	5.60177e-05	0.002
GO_NEGATIVE_REGULATION_OF_LEUKOCYTE_PROLIFERATION	72	-0.62427	-2.05653	0	5.45435e-05	0.002
GO_REGULATION_OF_LYMPHOCYTE_ACTIVATION	395	-0.544424	-2.0553	0	5.3145e-05	0.002
GO_REGULATION_OF_T_CELL_ACTIVATION	285	-0.553708	-2.04933	0	7.77138e-05	0.003
GO_REGULATION_OF_B_CELL_ACTIVATION	124	-0.587021	-2.04452	0	0.000101401	0.004
GO_T_CELL_DIFFERENTIATION_INVOLVED_IN_IMMUNE_RESPONSE	59	-0.643601	-2.04361	0	9.8987e-05	0.004
GO_LEUKOCYTE_CELL_CELL_ADHESION	300	-0.546379	-2.04285	0	9.6685e-05	0.004
GO_MACROPHAGE_DIFFERENTIATION	37	-0.691608	-2.03745	0	9.44876e-05	0.004
GO_POSITIVE_REGULATION_OF_CYTOKINE_BIOSYNTHETIC_PROCESS	55	-0.6431	-2.0365	0	9.23879e-05	0.004
GO_POSITIVE_REGULATION_OF_RESPONSE_TO_CYTOKINE_STIMULUS	52	-0.644624	-2.031	0	9.03795e-05	0.004
GO_MONOCYTE_CHEMOTAXIS	49	-0.655898	-2.02849	0	8.84565e-05	0.004
GO_MYELOID_LEUKOCYTE_DIFFERENTIATION	183	-0.556225	-2.02444	0	8.66137e-05	0.004
GO_POSITIVE_REGULATION_OF_CYTOKINE_PRODUCTION	385	-0.538988	-2.01893	0	0.000106115	0.005
GO_RESPONSE_TO_INTERFERON_GAMMA	175	-0.561801	-2.01598	0	0.000103992	0.005
GO_REGULATION_OF_LEUKOCYTE_MEDIATED_IMMUNITY	179	-0.558546	-2.01506	0	0.000122384	0.006
GO_INTERLEUKIN_1_PRODUCTION	78	-0.609127	-2.01441	0	0.000140106	0.007
GO_REGULATION_OF_LEUKOCYTE_MIGRATION	173	-0.558225	-2.01199	0	0.000137463	0.007
GO_POSITIVE_REGULATION_OF_INTERLEUKIN_6_PRODUCTION	70	-0.618699	-2.00921	0	0.000154389	0.008
GO_CD4_POSITIVE_ALPHA_BETA_T_CELL_ACTIVATION	79	-0.606008	-2.00891	0	0.000151582	0.008
GO_FC_RECEPTOR_MEDIATED_STIMULATORY_SIGNALING_PATHWAY	89	-0.60208	-2.00803	0	0.000148876	0.008
GO_INTERLEUKIN_6_PRODUCTION	117	-0.576278	-2.00586	0	0.000164322	0.009
GO_INTERLEUKIN_1_BETA_SECRETION	40	-0.665787	-2.00373	0	0.000161489	0.009
GO_CELLULAR_RESPONSE_TO_BIOTIC_STIMULUS	198	-0.547861	-2.00214	0	0.000176516	0.01
GO_POSITIVE_REGULATION_OF_LEUKOCYTE_DIFFERENTIATION	131	-0.57056	-1.99864	0	0.00022547	0.013
GO_RESPONSE_TO_BACTERIUM	486	-0.52695	-1.99609	0	0.000255979	0.015
GO_POSITIVE_REGULATION_OF_CELL_CELL_ADHESION	229	-0.540291	-1.99467	0	0.00025185	0.015
GO_LEUKOCYTE_CHEMOTAXIS	186	-0.546599	-1.99463	0	0.000247853	0.015
GO_LEUKOCYTE_MIGRATION	384	-0.52907	-1.99462	0	0.00024398	0.015
GO_PHAGOCYTOSIS	249	-0.537864	-1.98826	0	0.000272449	0.017
GO_REGULATION_OF_ALPHA_BETA_T_CELL_ACTIVATION	85	-0.590137	-1.98666	0	0.000268321	0.017
GO_REGULATION_OF_PRODUCTION_OF_MOLECULAR_MEDIATOR_OF_IMMUNE_RESPONSE	127	-0.569928	-1.98585	0	0.000279812	0.018
GO_REGULATION_OF_LYMPHOCYTE_MEDIATED_IMMUNITY	130	-0.564714	-1.98453	0	0.000275697	0.018
GO_POSITIVE_REGULATION_OF_IMMUNE_EFFECTOR_PROCESS	192	-0.549627	-1.98422	0	0.000271701	0.018
GO_REGULATION_OF_MONONUCLEAR_CELL_MIGRATION	40	-0.661016	-1.98353	0	0.000282711	0.019
GO_INTERLEUKIN_1_SECRETION	46	-0.65144	-1.9806	0	0.000308095	0.021
GO_POSITIVE_REGULATION_OF_RESPONSE_TO_EXTERNAL_STIMULUS	271	-0.533713	-1.97867	0	0.000318487	0.022
GO_REGULATION_OF_MAST_CELL_ACTIVATION	37	-0.671488	-1.97843	0	0.000328411	0.023
GO_REGULATION_OF_COAGULATION	71	-0.601565	-1.97761	0	0.000323973	0.023
GO_GLIAL_CELL_ACTIVATION	44	-0.647233	-1.97647	0	0.000319653	0.023
GO_RESPONSE_TO_MOLECULE_OF_BACTERIAL_ORIGIN	293	-0.530698	-1.97527	0	0.000315447	0.023
GO_INTERLEUKIN_8_SECRETION	26	-0.719789	-1.97521	0	0.000311351	0.023
GO_ALPHA_BETA_T_CELL_DIFFERENTIATION	94	-0.584249	-1.97387	0	0.000334104	0.025
GO_LEUKOCYTE_DIFFERENTIATION	452	-0.521649	-1.97386	0	0.000329875	0.025
GO_PHAGOCYTOSIS_RECOGNITION	28	-0.707877	-1.97213	0	0.00033885	0.026
GO_INTERLEUKIN_1_BETA_PRODUCTION	66	-0.609267	-1.97184	0	0.000334667	0.026
GO_REGULATION_OF_CD4_POSITIVE_ALPHA_BETA_T_CELL_DIFFERENTIATION	42	-0.65444	-1.97065	0	0.000330586	0.026
GO_REGULATION_OF_LEUKOCYTE_DEGRANULATION	43	-0.65174	-1.96885	0	0.00033902	0.027
GO_REGULATION_OF_MAST_CELL_ACTIVATION_INVOLVED_IN_IMMUNE_RESPONSE	29	-0.699027	-1.96788	0	0.00035955	0.029
GO_REGULATION_OF_MACROPHAGE_ACTIVATION	51	-0.632856	-1.96577	0	0.00035532	0.029
GO_NEGATIVE_REGULATION_OF_LEUKOCYTE_CELL_CELL_ADHESION	107	-0.567298	-1.96438	0	0.000375475	0.031
GO_B_CELL_ACTIVATION	220	-0.540556	-1.96327	0	0.000395014	0.033
GO_POSITIVE_REGULATION_OF_INTERLEUKIN_8_PRODUCTION	40	-0.65856	-1.96288	0	0.000402424	0.034
GO_PRODUCTION_OF_MOLECULAR_MEDIATOR_OF_IMMUNE_RESPONSE	175	-0.542986	-1.95931	0	0.000468269	0.039
GO_OSTEOCLAST_DEVELOPMENT	18	-0.769332	-1.9576	0	0.000474807	0.04
GO_POSITIVE_REGULATION_OF_LYMPHOCYTE_DIFFERENTIATION	85	-0.589553	-1.9562	0	0.000503926	0.043
GO_NEGATIVE_REGULATION_OF_LYMPHOCYTE_ACTIVATION	127	-0.561191	-1.95599	0	0.000509747	0.044
GO_REGULATION_OF_CD4_POSITIVE_ALPHA_BETA_T_CELL_ACTIVATION	51	-0.629116	-1.95566	0	0.000515546	0.045
GO_REGULATION_OF_MYELOID_LEUKOCYTE_MEDIATED_IMMUNITY	52	-0.634423	-1.95548	0	0.000510062	0.045
GO_POSITIVE_REGULATION_OF_LEUKOCYTE_MIGRATION	113	-0.568915	-1.95179	0	0.000570616	0.051
GO_MYELOID_LEUKOCYTE_MIGRATION	170	-0.539329	-1.9515	0	0.000575479	0.052
GO_EPITHELIAL_TUBE_BRANCHING_INVOLVED_IN_LUNG_MORPHOGENESIS	29	-0.696941	-1.95	0	0.000569546	0.052
GO_NEUTROPHIL_MIGRATION	91	-0.576897	-1.94995	0	0.000563734	0.052
GO_REGULATION_OF_LEUKOCYTE_CHEMOTAXIS	101	-0.569855	-1.94589	0	0.000579224	0.054
GO_DEFENSE_RESPONSE_TO_BACTERIUM	168	-0.545969	-1.94579	0	0.000573432	0.054
Table S4D
List of top 10 common biological processes negatively associated with 1p/19q codel in muIDH LGGs of all three LGG datasets
NAME
GO_POSITIVE_REGULATION_OF_CYTOKINE_BIOSYNTHETIC_PROCESS
GO_CYTOKINE_METABOLIC_PROCESS
GO_T_CELL_PROLIFERATION
GO_POSITIVE_REGULATION_OF_T_CELL_PROLIFERATION
GO_ADAPTIVE_IMMUNE_RESPONSE
GO_POSITIVE_REGULATION_OF_LEUKOCYTE_CELL_CELL_ADHESION
GO_ADAPTIVE_IMMUNE_RESPONSE_BASED_ON_SOMATIC_RECOMBINATION_OF_IMMUNE_RECEPTORS_BUILT_FROM_IMMUNOGLOBULIN_SUPERFAMILY_DOMAINS
GO_INTERFERON_GAMMA_PRODUCTION
GO_POSITIVE_REGULATION_OF_CELL_ACTIVATION
GO_REGULATION_OF_ADAPTIVE_IMMUNE_RESPONSE
ES: Enrichment Score
NES: Normalized Enrichment Score
