# Supplementary material for: Effects of 1p/19q Codeletion on Immune Phenotype in Low Grade Glioma
Source: Front Cell Neurosci. 2021 Jul 16;15:704344. doi: 10.3389/fncel.2021.704344 (PMC8322528; doi:10.3389/fncel.2021.704344)
Supplement: Supplementary Table 5 — List of immune-related genes mapped on chromosome 1p and 19q. [file Table_5.XLSX]

## Sheet: Geneappend3
Symbol	ID	Name	Synonyms	Chromosome	Category
AZGP1	563	alpha-2-glycoprotein 1, zinc-binding	ZA2G|ZAG	7	Antigen_Processing_and_Presentation
B2M	567	beta-2-microglobulin	-	15	Antigen_Processing_and_Presentation
CALR	811	calreticulin	CRT|FLJ26680|RO|SSA|cC1qR	19	Antigen_Processing_and_Presentation
CANX	821	calnexin	CNX|FLJ26570|IP90|P90	5	Antigen_Processing_and_Presentation
CD1A	909	CD1a molecule	CD1|FCB6|HTA1|R4|T6	1	Antigen_Processing_and_Presentation
CD1B	910	CD1b molecule	CD1|CD1A|MGC125990|MGC125991|R1	1	Antigen_Processing_and_Presentation
CD1C	911	CD1c molecule	BDCA1|CD1|CD1A|R7	1	Antigen_Processing_and_Presentation
CD1D	912	CD1d molecule	CD1A|MGC34622|R3	1	Antigen_Processing_and_Presentation
CD1E	913	CD1e molecule	CD1A|R2	1	Antigen_Processing_and_Presentation
CD4	920	CD4 molecule	CD4mut	12	Antigen_Processing_and_Presentation
CD8A	925	CD8a molecule	CD8|Leu2|MAL|p32	2	Antigen_Processing_and_Presentation
CD8B	926	CD8b molecule	CD8B1|LYT3|Leu2|Ly3|MGC119115	2	Antigen_Processing_and_Presentation
CD74	972	CD74 molecule, major histocompatibility complex, class II invariant chain	DHLAG|HLADG|Ia-GAMMA	5	Antigen_Processing_and_Presentation
CREB1	1385	cAMP responsive element binding protein 1	CREB|MGC9284	2	Antigen_Processing_and_Presentation
CTSB	1508	cathepsin B	APPS|CPSB	8	Antigen_Processing_and_Presentation
CTSE	1510	cathepsin E	CATE	1	Antigen_Processing_and_Presentation
CTSL1	1514	cathepsin L1	CATL|CTSL|FLJ31037|MEP	9	Antigen_Processing_and_Presentation
CTSS	1520	cathepsin S	MGC3886	1	Antigen_Processing_and_Presentation
FCER1G	2207	Fc fragment of IgE, high affinity I, receptor for; gamma polypeptide	FCRG	1	Antigen_Processing_and_Presentation
FCGRT	2217	Fc fragment of IgG, receptor, transporter, alpha	FCRN|alpha-chain	19	Antigen_Processing_and_Presentation
PDIA3	2923	protein disulfide isomerase family A, member 3	ER60|ERp57|ERp60|ERp61|GRP57|GRP58|HsT17083|P58|PI-PLC	15	Antigen_Processing_and_Presentation
HFE	3077	hemochromatosis	HFE1|HH|HLA-H|MGC103790|MVCD7|dJ221C16.10.1	6	Antigen_Processing_and_Presentation
HLA-A	3105	major histocompatibility complex, class I, A	FLJ26655|HLAA	6	Antigen_Processing_and_Presentation
HLA-B	3106	major histocompatibility complex, class I, B	AS|HLA-B-7301|HLA-B73|HLAB|HLAC|MGC111087|SPDA1	6	Antigen_Processing_and_Presentation
HLA-C	3107	major histocompatibility complex, class I, C	D6S204|FLJ27082|HLA-Cw|HLA-Cw12|HLA-JY3|HLC-C|PSORS1	6	Antigen_Processing_and_Presentation
HLA-DMA	3108	major histocompatibility complex, class II, DM alpha	D6S222E|DMA|HLADM|RING6	6	Antigen_Processing_and_Presentation
HLA-DMB	3109	major histocompatibility complex, class II, DM beta	D6S221E|RING7	6	Antigen_Processing_and_Presentation
HLA-DOA	3111	major histocompatibility complex, class II, DO alpha	HLA-DNA|HLA-DZA|HLADZ	6	Antigen_Processing_and_Presentation
HLA-DOB	3112	major histocompatibility complex, class II, DO beta	DOB	6	Antigen_Processing_and_Presentation
HLA-DPA1	3113	major histocompatibility complex, class II, DP alpha 1	HLA-DP1A|HLADP|HLASB	6	Antigen_Processing_and_Presentation
HLA-DPB1	3115	major histocompatibility complex, class II, DP beta 1	DPB1|HLA-DP1B	6	Antigen_Processing_and_Presentation
HLA-DQA1	3117	major histocompatibility complex, class II, DQ alpha 1	CD|CELIAC1|DQ-A1|FLJ27088|FLJ27328|GSE|HLA-DQA|MGC149527	6	Antigen_Processing_and_Presentation
HLA-DQA2	3118	major histocompatibility complex, class II, DQ alpha 2	HLA-DXA	6	Antigen_Processing_and_Presentation
HLA-DQB1	3119	major histocompatibility complex, class II, DQ beta 1	CELIAC1|HLA-DQB|IDDM1	6	Antigen_Processing_and_Presentation
HLA-DRA	3122	major histocompatibility complex, class II, DR alpha	HLA-DRA1	6	Antigen_Processing_and_Presentation
HLA-DRB1	3123	major histocompatibility complex, class II, DR beta 1	DRB1|FLJ75017|FLJ76359|HLA-DR1B|HLA-DRB|HLA-DRB1*|SS1	6	Antigen_Processing_and_Presentation
HLA-DRB3	3125	major histocompatibility complex, class II, DR beta 3	HLA-DR3B|HLA-DR52|MGC117330	6	Antigen_Processing_and_Presentation
HLA-DRB4	3126	major histocompatibility complex, class II, DR beta 4	DRB4|HLA-DR4B	6	Antigen_Processing_and_Presentation
HLA-DRB5	3127	major histocompatibility complex, class II, DR beta 5	FLJ76359|HLA-DRB	6	Antigen_Processing_and_Presentation
HLA-E	3133	major histocompatibility complex, class I, E	DKFZp686P19218|EA1.2|EA2.1|HLA-6.2|MHC|QA1	6	Antigen_Processing_and_Presentation
HLA-F	3134	major histocompatibility complex, class I, F	CDA12|HLA-5.4|HLA-CDA12|HLAF	6	Antigen_Processing_and_Presentation
HLA-G	3135	major histocompatibility complex, class I, G	MHC-G	6	Antigen_Processing_and_Presentation
HLA-H	3136	major histocompatibility complex, class I, H (pseudogene)	HLAHP	6	Antigen_Processing_and_Presentation
MR1	3140	major histocompatibility complex, class I-related	HLALS	1	Antigen_Processing_and_Presentation
HSPA1A	3303	heat shock 70kDa protein 1A	FLJ54303|FLJ54370|FLJ54392|FLJ54408|FLJ75127|HSP70-1|HSP70-1A|HSP70I|HSP72|HSPA1|HSPA1B	6	Antigen_Processing_and_Presentation
HSPA1B	3304	heat shock 70kDa protein 1B	FLJ54328|HSP70-1B|HSP70-2|HSPA1A	6	Antigen_Processing_and_Presentation
HSPA1L	3305	heat shock 70kDa protein 1-like	HSP70-1L|HSP70-HOM|HSP70T|hum70t	6	Antigen_Processing_and_Presentation
HSPA2	3306	heat shock 70kDa protein 2	HSP70-2|HSP70-3	14	Antigen_Processing_and_Presentation
HSPA4	3308	heat shock 70kDa protein 4	APG-2|HS24/P52|MGC131852|RY|hsp70|hsp70RY	5	Antigen_Processing_and_Presentation
HSPA5	3309	heat shock 70kDa protein 5 (glucose-regulated protein, 78kDa)	BIP|FLJ26106|GRP78|MIF2	9	Antigen_Processing_and_Presentation
HSPA6	3310	heat shock 70kDa protein 6 (HSP70B')	-	1	Antigen_Processing_and_Presentation
HSPA8	3312	heat shock 70kDa protein 8	HSC54|HSC70|HSC71|HSP71|HSP73|HSPA10|LAP1|MGC131511|MGC29929|NIP71	11	Antigen_Processing_and_Presentation
HSP90AA1	3320	heat shock protein 90kDa alpha (cytosolic), class A member 1	FLJ31884|HSP86|HSP89A|HSP90A|HSP90N|HSPC1|HSPCA|HSPCAL1|HSPCAL4|HSPN|Hsp89|Hsp90|LAP2	14	Antigen_Processing_and_Presentation
HSP90AB1	3326	heat shock protein 90kDa alpha (cytosolic), class B member 1	D6S182|FLJ26984|HSP90-BETA|HSP90B|HSPC2|HSPCB	6	Antigen_Processing_and_Presentation
ICAM1	3383	intercellular adhesion molecule 1	BB2|CD54|P3.58	19	Antigen_Processing_and_Presentation
IFNA1	3439	interferon, alpha 1	IFL|IFN|IFN-ALPHA|IFNA13|IFNA@|MGC138207|MGC138505|MGC138507	9	Antigen_Processing_and_Presentation
IFNA2	3440	interferon, alpha 2	IFNA|INFA2|MGC125764|MGC125765	9	Antigen_Processing_and_Presentation
IFNA4	3441	interferon, alpha 4	INFA4|MGC142200	9	Antigen_Processing_and_Presentation
IFNA5	3442	interferon, alpha 5	INFA5	9	Antigen_Processing_and_Presentation
IFNA6	3443	interferon, alpha 6	-	9	Antigen_Processing_and_Presentation
IFNA7	3444	interferon, alpha 7	IFNA-J	9	Antigen_Processing_and_Presentation
IFNA8	3445	interferon, alpha 8	-	9	Antigen_Processing_and_Presentation
IFNA10	3446	interferon, alpha 10	MGC119878|MGC119879	9	Antigen_Processing_and_Presentation
IFNA13	3447	interferon, alpha 13	-	9	Antigen_Processing_and_Presentation
IFNA14	3448	interferon, alpha 14	LEIF2H|MGC125756|MGC125757	9	Antigen_Processing_and_Presentation
IFNA16	3449	interferon, alpha 16	-	9	Antigen_Processing_and_Presentation
IFNA17	3451	interferon, alpha 17	IFNA|INFA|LEIF2C1	9	Antigen_Processing_and_Presentation
IFNA21	3452	interferon, alpha 21	MGC126687|MGC126689	9	Antigen_Processing_and_Presentation
IFNG	3458	interferon, gamma	IFG|IFI	12	Antigen_Processing_and_Presentation
KIR2DL1	3802	killer cell immunoglobulin-like receptor, two domains, long cytoplasmic tail, 1	CD158A|KIR-K64|KIR221|NKAT|NKAT1|p58.1	19	Antigen_Processing_and_Presentation
KIR2DL2	3803	killer cell immunoglobulin-like receptor, two domains, long cytoplasmic tail, 2	CD158B1|CD158b|NKAT6|p58.2	19	Antigen_Processing_and_Presentation
KIR2DL3	3804	killer cell immunoglobulin-like receptor, two domains, long cytoplasmic tail, 3	CD158B2|CD158b|GL183|KIR-023GB|KIR-K7b|KIR-K7c|KIRCL23|MGC129943|NKAT|NKAT2|NKAT2A|NKAT2B|p58	19	Antigen_Processing_and_Presentation
KIR2DL4	3805	killer cell immunoglobulin-like receptor, two domains, long cytoplasmic tail, 4	CD158D|G9P|KIR103|KIR103AS	19	Antigen_Processing_and_Presentation
KIR2DS1	3806	killer cell immunoglobulin-like receptor, two domains, short cytoplasmic tail, 1	CD158H|CD158a|p50.1	19	Antigen_Processing_and_Presentation
KIR2DS3	3808	killer cell immunoglobulin-like receptor, two domains, short cytoplasmic tail, 3	NKAT7	19	Antigen_Processing_and_Presentation
KIR2DS4	3809	killer cell immunoglobulin-like receptor, two domains, short cytoplasmic tail, 4	CD158I|KIR1D|KIR412|KKA3|MGC120019|MGC125315|MGC125317|NKAT8	19	Antigen_Processing_and_Presentation
KIR2DS5	3810	killer cell immunoglobulin-like receptor, two domains, short cytoplasmic tail, 5	CD158G|NKAT9	19	Antigen_Processing_and_Presentation
KIR3DL1	3811	killer cell immunoglobulin-like receptor, three domains, long cytoplasmic tail, 1	CD158E1|KIR|MGC119726|MGC119728|MGC126589|MGC126591|NKAT3|NKB1|NKB1B	19	Antigen_Processing_and_Presentation
KIR3DL2	3812	killer cell immunoglobulin-like receptor, three domains, long cytoplasmic tail, 2	CD158K|MGC125321|NKAT4|NKAT4B|p140	19	Antigen_Processing_and_Presentation
KLRC1	3821	killer cell lectin-like receptor subfamily C, member 1	CD159A|MGC13374|MGC59791|NKG2|NKG2A	12	Antigen_Processing_and_Presentation
KLRC2	3822	killer cell lectin-like receptor subfamily C, member 2	CD159c|MGC138244|NKG2-C|NKG2C	12	Antigen_Processing_and_Presentation
KLRC3	3823	killer cell lectin-like receptor subfamily C, member 3	NKG2-E|NKG2E	12	Antigen_Processing_and_Presentation
KLRD1	3824	killer cell lectin-like receptor subfamily D, member 1	CD94	12	Antigen_Processing_and_Presentation
LTA	4049	lymphotoxin alpha (TNF superfamily, member 1)	LT|TNFB|TNFSF1	6	Antigen_Processing_and_Presentation
CIITA	4261	class II, major histocompatibility complex, transactivator	C2TA|CIITAIV|MHC2TA|NLRA	16	Antigen_Processing_and_Presentation
MICA	4276	MHC class I polypeptide-related sequence A	FLJ60820|MGC111087|PERB11.1	6	Antigen_Processing_and_Presentation
MICB	4277	MHC class I polypeptide-related sequence B	PERB11.2	6	Antigen_Processing_and_Presentation
NFYA	4800	nuclear transcription factor Y, alpha	CBF-A|CBF-B|FLJ11236|HAP2|NF-YA	6	Antigen_Processing_and_Presentation
NFYB	4801	nuclear transcription factor Y, beta	CBF-A|CBF-B|HAP3|NF-YB	12	Antigen_Processing_and_Presentation
NFYC	4802	nuclear transcription factor Y, gamma	CBF-C|CBFC|DKFZp667G242|FLJ45775|H1TF2A|HAP5|HSM|NF-YC	1	Antigen_Processing_and_Presentation
LGMN	5641	legumain	AEP|LGMN1|PRSC1	14	Antigen_Processing_and_Presentation
PSMB8	5696	proteasome (prosome, macropain) subunit, beta type, 8 (large multifunctional peptidase 7)	D6S216|D6S216E|LMP7|MGC1491|PSMB5i|RING10|beta5i	6	Antigen_Processing_and_Presentation
PSMC1	5700	proteasome (prosome, macropain) 26S subunit, ATPase, 1	MGC24583|MGC8541|P26S4|S4|p56	14	Antigen_Processing_and_Presentation
PSMC2	5701	proteasome (prosome, macropain) 26S subunit, ATPase, 2	MGC3004|MSS1|Nbla10058|S7	7	Antigen_Processing_and_Presentation
PSMC3	5702	proteasome (prosome, macropain) 26S subunit, ATPase, 3	MGC8487|TBP1	11	Antigen_Processing_and_Presentation
PSMC4	5704	proteasome (prosome, macropain) 26S subunit, ATPase, 4	MGC13687|MGC23214|MGC8570|MIP224|S6|TBP7	19	Antigen_Processing_and_Presentation
PSMC5	5705	proteasome (prosome, macropain) 26S subunit, ATPase, 5	S8|SUG-1|SUG1|TBP10|TRIP1|p45|p45/SUG	17	Antigen_Processing_and_Presentation
PSMC6	5706	proteasome (prosome, macropain) 26S subunit, ATPase, 6	CADP44|MGC12520|P44|SUG2|p42	14	Antigen_Processing_and_Presentation
PSMD1	5707	proteasome (prosome, macropain) 26S subunit, non-ATPase, 1	MGC133040|MGC133041|P112|Rpn2|S1	2	Antigen_Processing_and_Presentation
PSMD2	5708	proteasome (prosome, macropain) 26S subunit, non-ATPase, 2	MGC14274|P97|Rpn1|S2|TRAP2	3	Antigen_Processing_and_Presentation
PSMD3	5709	proteasome (prosome, macropain) 26S subunit, non-ATPase, 3	P58|RPN3|S3	17	Antigen_Processing_and_Presentation
PSMD4	5710	proteasome (prosome, macropain) 26S subunit, non-ATPase, 4	AF|AF-1|ASF|MCB1|Rpn10|S5A|pUB-R5	1	Antigen_Processing_and_Presentation
PSMD5	5711	proteasome (prosome, macropain) 26S subunit, non-ATPase, 5	KIAA0072|MGC23145|S5B	9	Antigen_Processing_and_Presentation
PSMD7	5713	proteasome (prosome, macropain) 26S subunit, non-ATPase, 7	MOV34|P40|Rpn8|S12	16	Antigen_Processing_and_Presentation
PSMD8	5714	proteasome (prosome, macropain) 26S subunit, non-ATPase, 8	HIP6|HYPF|MGC1660|Nin1p|Rpn12|S14|p31	19	Antigen_Processing_and_Presentation
PSMD10	5716	proteasome (prosome, macropain) 26S subunit, non-ATPase, 10	dJ889N15.2|p28	X	Antigen_Processing_and_Presentation
PSMD11	5717	proteasome (prosome, macropain) 26S subunit, non-ATPase, 11	MGC3844|Rpn6|S9|p44.5	17	Antigen_Processing_and_Presentation
PSMD13	5719	proteasome (prosome, macropain) 26S subunit, non-ATPase, 13	HSPC027|Rpn9|S11|p40.5	11	Antigen_Processing_and_Presentation
PSME1	5720	proteasome (prosome, macropain) activator subunit 1 (PA28 alpha)	IFI5111|MGC8628|PA28A|PA28alpha|REGalpha	14	Antigen_Processing_and_Presentation
PSME1	5720	proteasome (prosome, macropain) activator subunit 1 (PA28 alpha)	IFI5111|MGC8628|PA28A|PA28alpha|REGalpha	14	Antigen_Processing_and_Presentation
PSME2	5721	proteasome (prosome, macropain) activator subunit 2 (PA28 beta)	PA28B|PA28beta|REGbeta	14	Antigen_Processing_and_Presentation
PSME2	5721	proteasome (prosome, macropain) activator subunit 2 (PA28 beta)	PA28B|PA28beta|REGbeta	14	Antigen_Processing_and_Presentation
RELB	5971	v-rel reticuloendotheliosis viral oncogene homolog B	I-REL|IREL	19	Antigen_Processing_and_Presentation
RFX5	5993	regulatory factor X, 5 (influences HLA class II expression)	-	1	Antigen_Processing_and_Presentation
RFXAP	5994	regulatory factor X-associated protein	-	13	Antigen_Processing_and_Presentation
SLC10A2	6555	solute carrier family 10 (sodium/bile acid cotransporter family), member 2	ASBT|ISBT|NTCP2	13	Antigen_Processing_and_Presentation
TAP1	6890	transporter 1, ATP-binding cassette, sub-family B (MDR/TAP)	ABC17|ABCB2|APT1|D6S114E|FLJ26666|FLJ41500|PSF1|RING4|TAP1*0102N|TAP1N	6	Antigen_Processing_and_Presentation
TAP2	6891	transporter 2, ATP-binding cassette, sub-family B (MDR/TAP)	ABC18|ABCB3|APT2|D6S217E|PSF2|RING11	6	Antigen_Processing_and_Presentation
TAPBP	6892	TAP binding protein (tapasin)	NGS17|TAPA|TPN|TPSN|tapasin	6	Antigen_Processing_and_Presentation
THBS1	7057	thrombospondin 1	THBS|THBS-1|TSP|TSP-1|TSP1	15	Antigen_Processing_and_Presentation
SHFM1	7979	split hand/foot malformation (ectrodactyly) type 1	DSS1|ECD|SEM1|SHFD1|SHSF1|Shfdg1	7	Antigen_Processing_and_Presentation
KLRC4	8302	killer cell lectin-like receptor subfamily C, member 4	FLJ17759|FLJ78582|NKG2-F|NKG2F	12	Antigen_Processing_and_Presentation
AP3B1	8546	adaptor-related protein complex 3, beta 1 subunit	ADTB3|ADTB3A|HPS|HPS2|PE	5	Antigen_Processing_and_Presentation
RFXANK	8625	regulatory factor X-associated ankyrin-containing protein	ANKRA1|BLS|F14150_1|MGC138628|RFX-B	19	Antigen_Processing_and_Presentation
PSMD6	9861	proteasome (prosome, macropain) 26S subunit, non-ATPase, 6	KIAA0107|Rpn7|S10|SGA-113M|p44S10	3	Antigen_Processing_and_Presentation
PSME3	10197	proteasome (prosome, macropain) activator subunit 3 (PA28 gamma; Ki)	Ki|PA28-gamma|PA28G|REG-GAMMA	17	Antigen_Processing_and_Presentation
PSMD14	10213	proteasome (prosome, macropain) 26S subunit, non-ATPase, 14	PAD1|POH1|rpn11	2	Antigen_Processing_and_Presentation
CLEC4M	10332	C-type lectin domain family 4, member M	CD209L|CD299|DC-SIGN2|DC-SIGNR|DCSIGNR|HP10347|L-SIGN|LSIGN|MGC129964|MGC47866	19	Antigen_Processing_and_Presentation
IFI30	10437	interferon, gamma-inducible protein 30	GILT|IFI-30|IP30|MGC32056	19	Antigen_Processing_and_Presentation
PROCR	10544	protein C receptor, endothelial (EPCR)	CCCA|CCD41|CD201|EPCR|MGC23024|bA42O4.2	20	Antigen_Processing_and_Presentation
ADRM1	11047	adhesion regulating molecule 1	ARM1|GP110|MGC29536|Rpn13	20	Antigen_Processing_and_Presentation
KIAA0368	23392	KIAA0368	ECM29|FLJ22036|KIAA1962|RP11-386D8.2	9	Antigen_Processing_and_Presentation
TRPC4AP	26133	transient receptor potential cation channel, subfamily C, member 4 associated protein	C20orf188|TRRP4AP|TRUSS	20	Antigen_Processing_and_Presentation
CD209	30835	CD209 molecule	CDSIGN|CLEC4L|DC-SIGN|DC-SIGN1|MGC129965	19	Antigen_Processing_and_Presentation
UBXN1	51035	UBX domain protein 1	2B28|UBXD10	11	Antigen_Processing_and_Presentation
ERAP1	51752	endoplasmic reticulum aminopeptidase 1	A-LAP|ALAP|APPILS|ARTS-1|ARTS1|ERAAP|ERAAP1|KIAA0525|PILS-AP|PILSAP	5	Antigen_Processing_and_Presentation
TAPBPL	55080	TAP binding protein-like	FLJ10143|TAPBP-R|TAPBPR	12	Antigen_Processing_and_Presentation
KIR2DL5A	57292	killer cell immunoglobulin-like receptor, two domains, long cytoplasmic tail, 5A	CD158F|KIR2DL5|KIR2DL5.1|KIR2DL5.3	19	Antigen_Processing_and_Presentation
ERAP2	64167	endoplasmic reticulum aminopeptidase 2	FLJ23633|FLJ23701|FLJ23807|L-RAP|LRAP	5	Antigen_Processing_and_Presentation
ULBP3	79465	UL16 binding protein 3	RAET1N	6	Antigen_Processing_and_Presentation
ULBP2	80328	UL16 binding protein 2	N2DL2|RAET1H	6	Antigen_Processing_and_Presentation
ULBP1	80329	UL16 binding protein 1	RAET1I	6	Antigen_Processing_and_Presentation
KIR3DL3	115653	killer cell immunoglobulin-like receptor, three domains, long cytoplasmic tail, 3	CD158Z|KIR3DL7|KIR44|KIRC1	19	Antigen_Processing_and_Presentation
RAET1E	135250	retinoic acid early transcript 1E	LETAL|MGC125308|MGC125309|RAET1E2|ULBP4|bA350J20.7	6	Antigen_Processing_and_Presentation
RAET1L	154064	retinoic acid early transcript 1L	-	6	Antigen_Processing_and_Presentation
UBR1	197131	ubiquitin protein ligase E3 component n-recognin 1	JBS|MGC142065|MGC142067	15	Antigen_Processing_and_Presentation
RAET1G	353091	retinoic acid early transcript 1G	ULBP5	6	Antigen_Processing_and_Presentation
PDIA2	64714	protein disulfide isomerase family A, member 2	PDA2|PDI|PDIP|PDIR	16	Antigen_Processing_and_Presentation
HAMP	57817	hepcidin antimicrobial peptide	HEPC|HEPCIDIN|HFE2B|LEAP-1|LEAP1|PLTR	19	Antimicrobials
PI3	5266	peptidase inhibitor 3, skin-derived	ESI|MGC13613|SKALP|WAP3|WFDC14|cementoin	20	Antimicrobials
CAMP	820	cathelicidin antimicrobial peptide	CAP18|CRAMP|FALL-39|FALL39|HSD26|LL37	3	Antimicrobials
DEFB4	1673	defensin, beta 4	DEFB-2|DEFB102|DEFB2|HBD-2|SAP1	8	Antimicrobials
PPBP	5473	pro-platelet basic protein (chemokine (C-X-C motif) ligand 7)	B-TG1|Beta-TG|CTAP-III|CTAP3|CTAPIII|CXCL7|LA-PF4|LDGF|MDGF|NAP-2|PBP|SCYB7|TC1|TC2|TGB|TGB1|THBGB|THBGB1	4	Antimicrobials
REG3G	130120	regenerating islet-derived 3 gamma	MGC118998|MGC118999|MGC119001|PAP1B|PAPIB|REG-III|UNQ429	2	Antimicrobials
CXCL14	9547	chemokine (C-X-C motif) ligand 14	BMAC|BRAK|KS1|Kec|MGC10687|MIP-2g|NJAC|SCYB14|bolekine	5	Antimicrobials
CXCL16	58191	chemokine (C-X-C motif) ligand 16	CXCLG16|SR-PSOX|SRPSOX	17	Antimicrobials
SLPI	6590	secretory leukocyte peptidase inhibitor	ALK1|ALP|BLPI|HUSI|HUSI-I|MPI|WAP4|WFDC4	20	Antimicrobials
IL8	3576	interleukin 8	CXCL8|GCP-1|GCP1|LECT|LUCT|LYNAP|MDNCF|MONAP|NAF|NAP-1|NAP1	4	Antimicrobials
CXCL10	3627	chemokine (C-X-C motif) ligand 10	C7|IFI10|INP10|IP-10|SCYB10|crg-2|gIP-10|mob-1	4	Antimicrobials
CXCL9	4283	chemokine (C-X-C motif) ligand 9	CMK|Humig|MIG|SCYB9|crg-10	4	Antimicrobials
CXCL5	6374	chemokine (C-X-C motif) ligand 5	ENA-78|SCYB5	4	Antimicrobials
CXCL11	6373	chemokine (C-X-C motif) ligand 11	H174|I-TAC|IP-9|IP9|MGC102770|SCYB11|SCYB9B|b-R1	4	Antimicrobials
CXCL6	6372	chemokine (C-X-C motif) ligand 6 (granulocyte chemotactic protein 2)	CKA-3|GCP-2|GCP2|SCYB6	4	Antimicrobials
CXCL1	2919	chemokine (C-X-C motif) ligand 1 (melanoma growth stimulating activity, alpha)	FSP|GRO1|GROa|MGSA|MGSA-a|NAP-3|SCYB1	4	Antimicrobials
CXCL12	6387	chemokine (C-X-C motif) ligand 12 (stromal cell-derived factor 1)	PBSF|SCYB12|SDF-1a|SDF-1b|SDF1|SDF1A|SDF1B|TLSF-a|TLSF-b|TPAR1	10	Antimicrobials
CXCL13	10563	chemokine (C-X-C motif) ligand 13	ANGIE|ANGIE2|BCA-1|BCA1|BLC|BLR1L|SCYB13	4	Antimicrobials
CXCL2	2920	chemokine (C-X-C motif) ligand 2	CINC-2a|GRO2|GROb|MGSA-b|MIP-2a|MIP2|MIP2A|SCYB2	4	Antimicrobials
PF4	5196	platelet factor 4	CXCL4|MGC138298|SCYB4	4	Antimicrobials
XCL1	6375	chemokine (C motif) ligand 1	ATAC|LPTN|LTN|SCM-1|SCM-1a|SCM1|SCYC1	1	Antimicrobials
CXCL3	2921	chemokine (C-X-C motif) ligand 3	CINC-2b|GRO3|GROg|MIP-2b|MIP2B|SCYB3	4	Antimicrobials
DEFB103A	55894	defensin, beta 103A	DEFB103|DEFB3|HBD-3|HBD3|HBP-3|HBP3	8	Antimicrobials
CCL13	6357	chemokine (C-C motif) ligand 13	CKb10|MCP-4|MGC17134|NCC-1|NCC1|SCYA13|SCYL1	17	Antimicrobials
CCL1	6346	chemokine (C-C motif) ligand 1	I-309|P500|SCYA1|SISe|TCA3	17	Antimicrobials
DEFB1	1672	defensin, beta 1	BD1|DEFB-1|DEFB101|HBD1|MGC51822	8	Antimicrobials
CCL8	6355	chemokine (C-C motif) ligand 8	HC14|MCP-2|MCP2|SCYA10|SCYA8	17	Antimicrobials
ELANE	1991	elastase, neutrophil expressed	ELA2|GE|HLE|HNE|NE|PMN-E	19	Antimicrobials
DEFB103B	414325	defensin, beta 103B	-	8	Antimicrobials
DEFA3	1668	defensin, alpha 3, neutrophil-specific	DEF3|HNP-3|HNP3|HP-3	8	Antimicrobials
DEFA1	1667	defensin, alpha 1	DEF1|DEFA2|HNP-1|HP-1|MGC138393|MRS	8	Antimicrobials
TMSB10	9168	thymosin beta 10	MIG12|TB10	2	Antimicrobials
DEFA6	1671	defensin, alpha 6, Paneth cell-specific	DEF6|HD-6	8	Antimicrobials
DEFA5	1670	defensin, alpha 5, Paneth cell-specific	DEF5|HD-5|MGC129728	8	Antimicrobials
DEFA4	1669	defensin, alpha 4, corticostatin	DEF4|HNP-4|HP-4|HP4|MGC120099|MGC138296	8	Antimicrobials
LCN2	3934	lipocalin 2	24p3|NGAL	9	Antimicrobials
LCN1	3933	lipocalin 1 (tear prealbumin)	MGC71975|PMFA|TP|VEGP	9	Antimicrobials
COLEC10	10584	collectin sub-family member 10 (C-type lectin)	CLL1|MGC118794|MGC118795	8	Antimicrobials
BPI	671	bactericidal/permeability-increasing protein	-	20	Antimicrobials
S100A9	6280	S100 calcium binding protein A9	60B8AG|CAGB|CFAG|CGLB|L1AG|LIAG|MAC387|MIF|MRP14|NIF|P14	1	Antimicrobials
S100A8	6279	S100 calcium binding protein A8	60B8AG|CAGA|CFAG|CGLA|CP-10|L1Ag|MA387|MIF|MRP8|NIF|P8	1	Antimicrobials
DCD	117159	dermcidin	AIDD|DCD-1|DSEP|HCAP|MGC71930|PIF	12	Antimicrobials
LCN6	158062	lipocalin 6	LCN5|UNQ643|hLcn5	9	Antimicrobials
S100A12	6283	S100 calcium binding protein A12	CAAF1|CAGC|CGRP|ENRAGE|MRP6|p6	1	Antimicrobials
HTN3	3347	histatin 3	HIS2|HTN2|HTN5	4	Antimicrobials
LCN8	138307	lipocalin 8	EP17|LCN5	9	Antimicrobials
LOC728358	728358	defensin, alpha 1	-	8	Antimicrobials
CCR10	2826	chemokine (C-C motif) receptor 10	GPR2	17	Antimicrobials
CELA1	1990	chymotrypsin-like elastase family, member 1	ELA1	12	Antimicrobials
DEFB106A	245909	defensin, beta 106A	BD-6|DEFB-6|DEFB106|MGC118938|MGC118939|MGC118940|MGC118941|MGC133011|MGC133012	8	Antimicrobials
PENK	5179	proenkephalin	-	8	Antimicrobials
BPIL2	254240	bactericidal/permeability-increasing protein-like 2	-	22	Antimicrobials
MMP12	4321	matrix metallopeptidase 12 (macrophage elastase)	HME|MGC138506|MME	11	Antimicrobials
BPIL3	128859	bactericidal/permeability-increasing protein-like 3	LPLUNC6	20	Antimicrobials
LEAP2	116842	liver expressed antimicrobial peptide 2	LEAP-2	5	Antimicrobials
SFTPD	6441	surfactant protein D	COLEC7|PSP-D|SFTP4|SP-D	10	Antimicrobials
LCN9	392399	lipocalin 9	9230102I19Rik	9	Antimicrobials
BPIL1	80341	bactericidal/permeability-increasing protein-like 1	C20orf184|LPLUNC2|RYSR|dJ726C3.2	20	Antimicrobials
PTGDS	5730	prostaglandin D2 synthase 21kDa (brain)	LPGDS|PDS|PGD2|PGDS|PGDS2	9	Antimicrobials
TMSB4X	7114	thymosin beta 4, X-linked	FX|PTMB4|TB4X|TMSB4	X	Antimicrobials
PGLYRP1	8993	peptidoglycan recognition protein 1	MGC126894|MGC126896|PGLYRP|PGRP|PGRP-S|PGRPS|TAG7|TNFSF3L	19	Antimicrobials
ZC3HAV1	56829	zinc finger CCCH-type, antiviral 1	DKFZp686F2052|DKFZp686H1869|DKFZp686O19171|FLB6421|FLJ13288|MGC48898|ZAP|ZC3H2|ZC3HDC2	7	Antimicrobials
TMSB15A	11013	thymosin beta 15a	TMSB15|TMSL8|TMSNB|Tb15|TbNB	X	Antimicrobials
S100B	6285	S100 calcium binding protein B	NEF|S100|S100beta	21	Antimicrobials
S100A13	6284	S100 calcium binding protein A13	-	1	Antimicrobials
S100A6	6277	S100 calcium binding protein A6	2A9|5B10|CABP|CACY|PRA	1	Antimicrobials
DEFB119	245932	defensin, beta 119	DEFB-19|DEFB-20|DEFB120|ESC42-RELA|ESC42-RELB|MGC71893	20	Antimicrobials
DEFB107A	245910	defensin, beta 107A	BD-7|DEFB-7|DEFB107	8	Antimicrobials
DEFB105A	245908	defensin, beta 105A	BD-5|DEFB-5|DEFB105	8	Antimicrobials
SERPIND1	3053	serpin peptidase inhibitor, clade D (heparin cofactor), member 1	D22S673|HC2|HCF2|HCII|HLS2|LS2	22	Antimicrobials
DEFB129	140881	defensin, beta 129	C20orf87|DEFB-29|DEFB29|bA530N10.3|hBD-29	20	Antimicrobials
DEFB127	140850	defensin, beta 127	C20orf73|DEF-27|DEFB-27|DEFB27|bA530N10.2|hBD-27	20	Antimicrobials
S100P	6286	S100 calcium binding protein P	MIG9	4	Antimicrobials
S100A7	6278	S100 calcium binding protein A7	PSOR1|S100A7c	1	Antimicrobials
DEFB104A	140596	defensin, beta 104A	BD-4|DEFB-4|DEFB104|DEFB4|MGC118942|MGC118944|MGC118945|hBD-4	8	Antimicrobials
DEFB126	81623	defensin, beta 126	C20orf8|DEFB-26|DEFB26|ESP13.2|bA530N10.1|hBD-26	20	Antimicrobials
DEFB106B	503841	defensin, beta 106B	-	8	Antimicrobials
DEFB104B	503618	defensin, beta 104B	-	8	Antimicrobials
DEFB107B	503614	defensin, beta 107B	HsT21816	8	Antimicrobials
PGLYRP3	114771	peptidoglycan recognition protein 3	MGC149197|PGRP-Ialpha|PGRPIA	1	Antimicrobials
PGLYRP2	114770	peptidoglycan recognition protein 2	HMFT0141|PGLYRPL|PGRP-L|PGRPL|TAGL-like|tagL|tagL-alpha|tagl-beta	19	Antimicrobials
S100A10	6281	S100 calcium binding protein A10	42C|ANX2L|ANX2LG|CAL1L|CLP11|Ca[1]|GP11|MGC111133|P11|p10	1	Antimicrobials
S100A2	6273	S100 calcium binding protein A2	CAN19|MGC111539|S100L	1	Antimicrobials
DEFB125	245938	defensin, beta 125	DEFB-25|MGC57449	20	Antimicrobials
DEFB123	245936	defensin, beta 123	DEFB-23|ESC42-RELD	20	Antimicrobials
DEFB105B	504180	defensin, beta 105B	-	8	Antimicrobials
DEFB132	400830	defensin, beta 132	DEFB32|UNQ827	20	Antimicrobials
C20orf185	359710	chromosome 20 open reading frame 185	LPLUNC3|RYA3|dJ726C3.4	20	Antimicrobials
LCN12	286256	lipocalin 12	MGC34753|MGC48935	9	Antimicrobials
PGLYRP4	57115	peptidoglycan recognition protein 4	PGLYRPIbeta|PGRP-Ibeta|PGRPIB|SBBI67	1	Antimicrobials
S100A11	6282	S100 calcium binding protein A11	MLN70|S100C	1	Antimicrobials
S100A5	6276	S100 calcium binding protein A5	S100D	1	Antimicrobials
S100A3	6274	S100 calcium binding protein A3	S100E	1	Antimicrobials
S100A1	6271	S100 calcium binding protein A1	S100|S100-alpha|S100A	1	Antimicrobials
DEFB128	245939	defensin, beta 128	DEFB-28|DEFB28|hBD-28	20	Antimicrobials
DEFB108B	245911	defensin, beta 108B	-	11	Antimicrobials
HTN1	3346	histatin 1	HIS1	4	Antimicrobials
LMBR1L	55716	limb region 1 homolog (mouse)-like	FLJ10494|FLJ36251|KIAA1174|LIMR	12	Antimicrobials
S100A7A	338324	S100 calcium binding protein A7A	NICE-2|S100A15|S100A7L1|S100A7f	1	Antimicrobials
DEFB118	117285	defensin, beta 118	C20orf63|DEFB-18|ESC42|dJ1018D12.3	20	Antimicrobials
COLEC12	81035	collectin sub-family member 12	CLP1|NSR2|SCARA4|SRCL	18	Antimicrobials
TMSB4Y	9087	thymosin beta 4, Y-linked	MGC26307|TB4Y	Y	Antimicrobials
DEFB131	644414	defensin, beta 131	DEFB-31	4	Antimicrobials
DEFB134	613211	defensin, beta 134	MGC163333|MGC163335	8	Antimicrobials
DEFB130	245940	defensin, beta 130	DEFB-30	8	Antimicrobials
DEFB124	245937	defensin, beta 124	DEFB-24	20	Antimicrobials
DEFB121	245934	defensin, beta 121	DEFB-21|ESC42-RELC	20	Antimicrobials
DEFB116	245930	defensin, beta 116	DEFB-16	20	Antimicrobials
DEFB115	245929	defensin, beta 115	DEFB-15	20	Antimicrobials
DEFB114	245928	defensin, beta 114	DEFB-14	6	Antimicrobials
DEFB113	245927	defensin, beta 113	DEFB-13	6	Antimicrobials
DEFB112	245915	defensin, beta 112	DEFB-12	6	Antimicrobials
DEFB110	245913	defensin, beta 110	DEFB-10	6	Antimicrobials
TMSB15B	286527	thymosin beta 15B	MGC39900|Tbeta15b	X	Antimicrobials
DEFB133	403339	defensin, beta 133	-	12	Antimicrobials
S100Z	170591	S100 calcium binding protein Z	Gm625|S100-zeta	5	Antimicrobials
MAVS	57506	mitochondrial antiviral signaling protein	CARDIF|DKFZp547C224|DKFZp666M015|FLJ27482|FLJ35386|FLJ38051|FLJ41962|IPS-1|IPS1|KIAA1271|MGC3260|VISA	20	Antimicrobials
TMSL3	7117	thymosin-like 3	-	4	Antimicrobials
S100A14	57402	S100 calcium binding protein A14	BCMP84|S100A15	1	Antimicrobials
LCN10	414332	lipocalin 10	-	9	Antimicrobials
S100A16	140576	S100 calcium binding protein A16	AAG13|DT1P1A7|MGC17528|S100F	1	Antimicrobials
DEFB137	613210	beta-defensin 137	DEFB136	8	Antimicrobials
DEFB136	613209	beta-defensin 136	DEFB135	8	Antimicrobials
DEFB117	245931	defensin, beta 117	DEFB-17	20	Antimicrobials
DEFB111	245914	defensin, beta 111	DEFB-11	6	Antimicrobials
ZC3HAV1L	92092	zinc finger CCCH-type, antiviral 1-like	C7orf39|MGC14289	7	Antimicrobials
S100A7L2	645922	S100 calcium binding protein A7-like 2	S100a7b	1	Antimicrobials
LOC731414	731414	similar to S100 calcium-binding protein A10	-	17	Antimicrobials
LOC730963	730963	similar to Neutrophil defensin 4 precursor (HNP-4) (HP-4) (Defensin, alpha 4)	-	8	Antimicrobials
COLEC2	50639	collectin sub-family member 2	MBL	-	Antimicrobials
DEFB4P	728454	defensin, beta 4, pseudogene	-	8	Antimicrobials
C20orf186	149954	chromosome 20 open reading frame 186	LPLUNC4|RY2G5|dJ726C3.5	20	Antimicrobials
IFNAR1	3454	interferon (alpha, beta and omega) receptor 1	AVP|IFN-alpha-REC|IFNAR|IFNBR|IFRC	21	Antimicrobials
AZU1	566	azurocidin 1	AZAMP|AZU|CAP37|HBP|HUMAZUR|NAZC	19	Antimicrobials
LOC729523	729523	similar to beta-defensin 130	-	11	Antimicrobials
LOC100130154	100130154	similar to thymosin, beta 10	-	2	Antimicrobials
LOC100134379	100134379	similar to bactericidal/permeability-increasing protein	-	Un	Antimicrobials
LOC100134289	100134289	similar to bactericidal permeability increasing protein (BPI)	-	20	Antimicrobials
LOC100129216	100129216	similar to beta-defensin 131	-	11	Antimicrobials
DEFA1A3	613253	defensin, alpha 1 and alpha 3, variable copy number locus	DEFA1|DEFA3|DEFT1P	8	Antimicrobials
LOC100131433	100131433	similar to thymosin, beta 10	-	9	Antimicrobials
LCN1L1	286310	lipocalin 1-like 1	bA430N14.2	9	Antimicrobials
S100G	795	S100 calcium binding protein G	CABP1|CABP9K|CALB3|MGC138379	X	Antimicrobials
LOC648637	648637	similar to Neutrophil defensin 4 precursor (HNP-4) (HP-4) (Defensin, alpha 4)	-	8	Antimicrobials
LOC100130969	100130969	similar to lipocalin-like protein	-	9	Antimicrobials
LOC100133267	100133267	similar to beta-defensin 130	-	8	Antimicrobials
LOC100133128	100133128	Beta-defensin 108B-like	-	4	Antimicrobials
LOC100128174	100128174	similar to beta-defensin 131	-	8	Antimicrobials
TCHHL1	126637	trichohyalin-like 1	S100A17|THHL1|basalin	1	Antimicrobials
TINAGL1	64129	tubulointerstitial nephritis antigen-like 1	ARG1|LCN7|LIECG3|TINAGRP	1	Antimicrobials
IFNGR1	3459	interferon gamma receptor 1	CD119|FLJ45734|IFNGR	6	Antimicrobials
SLC22A17	51310	solute carrier family 22, member 17	BOCT|BOIT|NGALR|hBOIT	14	Antimicrobials
WFIKKN1	117166	WAP, follistatin/kazal, immunoglobulin, kunitz and netrin domain containing 1	C16orf12|MGC126651|MGC126655|RJD2|WFIKKN	16	Antimicrobials
WFDC2	10406	WAP four-disulfide core domain 2	HE4|MGC57529|WAP5|dJ461P17.6	20	Antimicrobials
IL6	3569	interleukin 6 (interferon, beta 2)	BSF2|HGF|HSF|IFNB2|IL-6	7	Antimicrobials
UMODL1	89766	uromodulin-like 1	-	21	Antimicrobials
TGFB1	7040	transforming growth factor, beta 1	CED|DPD1|TGFB|TGFbeta	19	Antimicrobials
PF4V1	5197	platelet factor 4 variant 1	CXCL4L1|CXCL4V1|PF4-ALT|PF4A|SCYB4V1	4	Antimicrobials
MMP9	4318	matrix metallopeptidase 9 (gelatinase B, 92kDa gelatinase, 92kDa type IV collagenase)	CLG4B|GELB|MMP-9	20	Antimicrobials
KAL1	3730	Kallmann syndrome 1 sequence	ADMLX|HHA|KAL|KALIG-1|KMS	X	Antimicrobials
TLR4	7099	toll-like receptor 4	ARMD10|CD284|TOLL|hToll	9	Antimicrobials
IFNG	3458	interferon, gamma	IFG|IFI	12	Antimicrobials
SPAG11B	10407	sperm associated antigen 11B	EP2|EP2C|EP2D|HE2|HE2C|MGC61846|SPAG11	8	Antimicrobials
A2M	2	alpha-2-macroglobulin	CPAMD5|DKFZp779B086|FWP007|S863-7	12	Antimicrobials
CTSL1	1514	cathepsin L1	CATL|CTSL|FLJ31037|MEP	9	Antimicrobials
NFKB1	4790	nuclear factor of kappa light polypeptide gene enhancer in B-cells 1	DKFZp686C01211|EBP-1|KBF1|MGC54151|NF-kappa-B|NFKB-p105|NFKB-p50|p105|p50	4	Antimicrobials
APOBEC3G	60489	apolipoprotein B mRNA editing enzyme, catalytic polypeptide-like 3G	ARP9|CEM15|FLJ12740|MDS019|bK150C2.7|dJ494G10.1	22	Antimicrobials
FABP6	2172	fatty acid binding protein 6, ileal	I-15P|I-BABP|I-BALB|I-BAP|ILBP|ILBP3|ILLBP	5	Antimicrobials
NOD2	64127	nucleotide-binding oligomerization domain containing 2	ACUG|BLAU|CARD15|CD|CLR16.3|IBD1|NLRC2|NOD2B|PSORAS1	16	Antimicrobials
MBL2	4153	mannose-binding lectin (protein C) 2, soluble (opsonic defect)	COLEC1|HSMBPC|MBL|MBP|MBP1|MGC116832|MGC116833	10	Antimicrobials
SFTPA1B	6435	surfactant protein A1B	AC068139.6|MGC133365|PSAP|PSPA|SFTP1|SFTPA1	10	Antimicrobials
RBP1	5947	retinol binding protein 1, cellular	CRABP-I|CRBP|CRBP1|CRBPI|RBPC	3	Antimicrobials
TLR2	7097	toll-like receptor 2	CD282|TIL4	4	Antimicrobials
SLC40A1	30061	solute carrier family 40 (iron-regulated transporter), member 1	FPN1|HFE4|IREG1|MST079|MSTP079|MTP1|SLC11A3	2	Antimicrobials
PLAU	5328	plasminogen activator, urokinase	ATF|UPA|URK|u-PA	10	Antimicrobials
IL1B	3553	interleukin 1, beta	IL-1|IL1-BETA|IL1F2	2	Antimicrobials
PAEP	5047	progestagen-associated endometrial protein	GD|GdA|GdF|GdS|MGC138509|MGC142288|PAEG|PEP|PP14	9	Antimicrobials
HFE2	148738	hemochromatosis type 2 (juvenile)	HFE2A|HJV|JH|MGC23953|RGMC	1	Antimicrobials
MUC5AC	4586	mucin 5AC, oligomeric mucus/gel-forming	MUC5	11	Antimicrobials
CTSS	1520	cathepsin S	MGC3886	1	Antimicrobials
OBP2A	29991	odorant binding protein 2A	OBP|OBP2C|OBPIIa|hOBPIIa	9	Antimicrobials
PLTP	5360	phospholipid transfer protein	HDLCQ9	20	Antimicrobials
MX1	4599	myxovirus (influenza virus) resistance 1, interferon-inducible protein p78 (mouse)	IFI-78K|IFI78|MX|MxA	21	Antimicrobials
DDX58	23586	DEAD (Asp-Glu-Ala-Asp) box polypeptide 58	DKFZp434J1111|DKFZp686N19181|FLJ13599|RIG-I	9	Antimicrobials
IL29	282618	interleukin 29 (interferon, lambda 1)	IFNL1|IL-29	19	Antimicrobials
IRF3	3661	interferon regulatory factor 3	-	19	Antimicrobials
SFTPA2	729238	surfactant protein A2	COLEC5|MGC189761|SP-A2|SPA2|SPAII	10	Antimicrobials
SFTPA2B	6436	surfactant protein A2B	AC068139.3|SFTPA2|SP-2A|SP-A1|SP-A2|SPAII	10	Antimicrobials
LPA	4018	lipoprotein, Lp(a)	AK38|APOA|LP	6	Antimicrobials
LBP	3929	lipopolysaccharide binding protein	MGC22233	20	Antimicrobials
RBP4	5950	retinol binding protein 4, plasma	-	10	Antimicrobials
SFTPA1	653509	surfactant protein A1	COLEC4|FLJ51913|SFTP1|SP-A|SP-A1	10	Antimicrobials
NOX4	50507	NADPH oxidase 4	KOX|KOX-1|RENOX	11	Antimicrobials
LTF	4057	lactotransferrin	GIG12|HLF2|LF	3	Antimicrobials
IFNB1	3456	interferon, beta 1, fibroblast	IFB|IFF|IFNB|MGC96956	9	Antimicrobials
RBP5	83758	retinol binding protein 5, cellular	CRBP-III|CRBP3|CRBPIII	12	Antimicrobials
FABP7	2173	fatty acid binding protein 7, brain	B-FABP|BLBP|DKFZp547J2313|FABPB|MRG	6	Antimicrobials
FABP5	2171	fatty acid binding protein 5 (psoriasis-associated)	E-FABP|EFABP|PA-FABP|PAFABP	8	Antimicrobials
FABP3	2170	fatty acid binding protein 3, muscle and heart (mammary-derived growth inhibitor)	FABP11|H-FABP|MDGI|O-FABP	1	Antimicrobials
FABP2	2169	fatty acid binding protein 2, intestinal	FABPI|I-FABP|MGC133132	4	Antimicrobials
FABP4	2167	fatty acid binding protein 4, adipocyte	A-FABP|aP2	8	Antimicrobials
R3HDML	140902	R3H domain containing-like	MGC129564|dJ881L22.3	20	Antimicrobials
C20orf71	128861	chromosome 20 open reading frame 71	MGC44525|SPLUNC3	20	Antimicrobials
C20orf114	92747	chromosome 20 open reading frame 114	LPLUNC1|MGC14597	20	Antimicrobials
OASL	8638	2'-5'-oligoadenylate synthetase-like	TRIP14|p59OASL	12	Antimicrobials
CRABP2	1382	cellular retinoic acid binding protein 2	CRABP-II|RBP6	1	Antimicrobials
CRABP1	1381	cellular retinoic acid binding protein 1	CRABP|CRABP-I|CRABPI|RBP5	15	Antimicrobials
RBP7	116362	retinol binding protein 7, cellular	CRBP4|CRBPIV|MGC70641	1	Antimicrobials
DUOX1	53905	dual oxidase 1	LNOX1|MGC138840|MGC138841|NOXEF1|THOX1	15	Antimicrobials
OBP2B	29989	odorant binding protein 2B	MGC119022|hOBPIIb	9	Antimicrobials
RBP2	5948	retinol binding protein 2, cellular	CRABP-II|CRBP2|CRBPII|RBPC2	3	Antimicrobials
LCN15	389812	lipocalin 15	PRO6093|UNQ2541	9	Antimicrobials
CETP	1071	cholesteryl ester transfer protein, plasma	HDLCQ10	16	Antimicrobials
FABP12	646486	fatty acid binding protein 12	-	8	Antimicrobials
FABP9	646480	fatty acid binding protein 9, testis	PERF|PERF15|T-FABP	8	Antimicrobials
PLUNC	51297	palate, lung and nasal epithelium associated	LPLUNC3|LUNX|NASG|SPLUNC1|SPURT|bA49G10.5	20	Antimicrobials
LCNL1	401562	lipocalin-like 1	FLJ45224	9	Antimicrobials
C8G	733	complement component 8, gamma polypeptide	C8C|MGC142186	9	Antimicrobials
SPAG11A	653423	sperm associated antigen 11A	HE2	8	Antimicrobials
PI15	51050	peptidase inhibitor 15	CRISP8|DKFZp686F0366|P24TI|P25TI	8	Antimicrobials
NOX1	27035	NADPH oxidase 1	GP91-2|MOX1|NOH-1|NOH1	X	Antimicrobials
PMP2	5375	peripheral myelin protein 2	FABP8|M-FABP|MP2|P2	8	Antimicrobials
APOD	347	apolipoprotein D	-	3	Antimicrobials
ORM2	5005	orosomucoid 2	AGP-B|AGP-B'|AGP2	9	Antimicrobials
ORM1	5004	orosomucoid 1	AGP-A|AGP1|ORM	9	Antimicrobials
TNF	7124	tumor necrosis factor (TNF superfamily, member 2)	DIF|TNF-alpha|TNFA|TNFSF2	6	Antimicrobials
CTSG	1511	cathepsin G	CG|MGC23078	14	Antimicrobials
PRTN3	5657	proteinase 3	ACPA|AGP7|C-ANCA|MBT|P29|PR-3	19	Antimicrobials
MAPK1	5594	mitogen-activated protein kinase 1	ERK|ERK2|ERT1|MAPK2|P42MAPK|PRKM1|PRKM2|p38|p40|p41|p41mapk	22	Antimicrobials
PML	5371	promyelocytic leukemia	MYL|PP8675|RNF71|TRIM19	15	Antimicrobials
AEN	64782	apoptosis enhancing nuclease	FLJ12484|FLJ12562|ISG20L1|pp12744	15	Antimicrobials
CYBB	1536	cytochrome b-245, beta polypeptide	CGD|GP91-1|GP91-PHOX|GP91PHOX|NOX2|p91-PHOX	X	Antimicrobials
C20orf70	140683	chromosome 20 open reading frame 70	PSP|SPLUNC2|bA49G10.1	20	Antimicrobials
ISG20	3669	interferon stimulated exonuclease gene 20kDa	CD25|HEM45	15	Antimicrobials
BCL3	602	B-cell CLL/lymphoma 3	BCL4|D19S37	19	Antimicrobials
ISG20L2	81875	interferon stimulated exonuclease gene 20kDa-like 2	FLJ12671	1	Antimicrobials
NOX5	79400	NADPH oxidase, EF-hand calcium binding domain 5	MGC149776|MGC149777|NOX5A|NOX5B	15	Antimicrobials
NOX3	50508	NADPH oxidase 3	GP91-3	6	Antimicrobials
DUOX2	50506	dual oxidase 2	LNOX2|NOXEF2|P138-TOX|THOX2	15	Antimicrobials
TLR3	7098	toll-like receptor 3	CD283	4	Antimicrobials
TFRC	7037	transferrin receptor (p90, CD71)	CD71|TFR|TFR1|TRFR	3	Antimicrobials
IFIH1	64135	interferon induced with helicase C domain 1	Hlcd|IDDM19|MDA-5|MDA5|MGC133047	2	Antimicrobials
LRP1	4035	low density lipoprotein-related protein 1 (alpha-2-macroglobulin receptor)	A2MR|APOER|APR|CD91|FLJ16451|IGFBP3R|LRP|MGC88725|TGFBR5	12	Antimicrobials
TRIM5	85363	tripartite motif-containing 5	RNF88|TRIM5alpha	11	Antimicrobials
IDO1	3620	indoleamine 2,3-dioxygenase 1	CD107B|IDO|INDO	8	Antimicrobials
GDF15	9518	growth differentiation factor 15	GDF-15|MIC-1|MIC1|NAG-1|PDF|PLAB|PTGFB	19	Antimicrobials
NEDD4	4734	neural precursor cell expressed, developmentally down-regulated 4	KIAA0093|MGC176705|NEDD4-1|RPF1	15	Antimicrobials
ADIPOQ	9370	adiponectin, C1Q and collagen domain containing	ACDC|ACRP30|ADIPQTL1|ADPN|APM-1|APM1|GBP28|adiponectin	3	Antimicrobials
STAT3	6774	signal transducer and activator of transcription 3 (acute-phase response factor)	APRF|FLJ20882|HIES|MGC16063	17	Antimicrobials
STAT1	6772	signal transducer and activator of transcription 1, 91kDa	DKFZp686B04100|ISGF-3|STAT91	2	Antimicrobials
IL28A	282616	interleukin 28A (interferon, lambda 2)	IFNL2|IL-28A	19	Antimicrobials
SOCS3	9021	suppressor of cytokine signaling 3	ATOD4|CIS3|Cish3|MGC71791|SOCS-3|SSI-3|SSI3	17	Antimicrobials
SEMG1	6406	semenogelin I	MGC14719|SEMG|SGI	20	Antimicrobials
TNFSF10	8743	tumor necrosis factor (ligand) superfamily, member 10	APO2L|Apo-2L|CD253|TL2|TRAIL	3	Antimicrobials
CCL20	6364	chemokine (C-C motif) ligand 20	CKb4|LARC|MIP-3a|MIP3A|SCYA20|ST38	2	Antimicrobials
SOCS1	8651	suppressor of cytokine signaling 1	CIS1|CISH1|JAB|SOCS-1|SSI-1|SSI1|TIP3	16	Antimicrobials
RNASEL	6041	ribonuclease L (2',5'-oligoisoadenylate synthetase-dependent)	DKFZp781D08126|MGC104972|MGC133329|PRCA1|RNS4	1	Antimicrobials
IRF1	3659	interferon regulatory factor 1	IRF-1|MAR	5	Antimicrobials
IL15	3600	interleukin 15	IL-15|MGC9721	4	Antimicrobials
APOBEC3F	200316	apolipoprotein B mRNA editing enzyme, catalytic polypeptide-like 3F	ARP8|BK150C2.4.MRNA|KA6|MGC74891	22	Antimicrobials
RARRES3	5920	retinoic acid receptor responder (tazarotene induced) 3	HRASLS4|MGC8906|PLA1/2-3|RIG1|TIG3	11	Antimicrobials
CHIT1	1118	chitinase 1 (chitotriosidase)	CHI3|CHIT|FLJ00314|MGC125322	1	Antimicrobials
IFNA1	3439	interferon, alpha 1	IFL|IFN|IFN-ALPHA|IFNA13|IFNA@|MGC138207|MGC138505|MGC138507	9	Antimicrobials
CD40	958	CD40 molecule, TNF receptor superfamily member 5	Bp50|CDW40|MGC9013|TNFRSF5|p50	20	Antimicrobials
TLR7	51284	toll-like receptor 7	-	X	Antimicrobials
PPIA	5478	peptidylprolyl isomerase A (cyclophilin A)	CYPA|CYPH|MGC117158|MGC12404|MGC23397	7	Antimicrobials
HFE	3077	hemochromatosis	HFE1|HH|HLA-H|MGC103790|MVCD7|dJ221C16.10.1	6	Antimicrobials
ZYX	7791	zyxin	ESP-2|HED-2	7	Antimicrobials
NLRX1	79671	NLR family member X1	CLR11.3|DLNB26|FLJ21478|MGC131937|MGC21025|NOD26|NOD5|NOD9	11	Antimicrobials
PGC	5225	progastricsin (pepsinogen C)	-	6	Antimicrobials
VEGFA	7422	vascular endothelial growth factor A	MGC70609|MVCD1|VEGF|VEGF-A|VPF	6	Antimicrobials
IKBKE	9641	inhibitor of kappa light polypeptide gene enhancer in B-cells, kinase epsilon	IKK-i|IKKE|IKKI|KIAA0151|MGC125294|MGC125295|MGC125297	1	Antimicrobials
ISG15	9636	ISG15 ubiquitin-like modifier	G1P2|IFI15|UCRP	1	Antimicrobials
DHX58	79132	DEXH (Asp-Glu-X-His) box polypeptide 58	D11LGP2|D11lgp2e|LGP2	17	Antimicrobials
TNFAIP3	7128	tumor necrosis factor, alpha-induced protein 3	A20|MGC104522|MGC138687|MGC138688|OTUD7C|TNFA1P2	6	Antimicrobials
TFR2	7036	transferrin receptor 2	HFE3|MGC126368|TFRC2	7	Antimicrobials
FCN2	2220	ficolin (collagen/fibrinogen domain containing lectin) 2 (hucolin)	EBP-37|FCNL|P35|ficolin-2	9	Antimicrobials
MUC4	4585	mucin 4, cell surface associated	HSA276359	3	Antimicrobials
F2R	2149	coagulation factor II (thrombin) receptor	CF2R|HTR|PAR1|TR	5	Antimicrobials
ELN	2006	elastin	FLJ38671|FLJ43523|SVAS|WBS|WS	7	Antimicrobials
IL27	246778	interleukin 27	IL-27|IL-27A|IL27p28|IL30|MGC71873|p28	16	Antimicrobials
MAPT	4137	microtubule-associated protein tau	DDPAC|FLJ31424|FTDP-17|MAPTL|MGC138549|MSTD|MTBT1|MTBT2|PPND|TAU	17	Antimicrobials
LYZ	4069	lysozyme (renal amyloidosis)	LZM|lysozyme	12	Antimicrobials
CCL5	6352	chemokine (C-C motif) ligand 5	D17S136E|MGC17164|RANTES|SCYA5|SISd|TCP228	17	Antimicrobials
LEP	3952	leptin	FLJ94114|OB|OBS	7	Antimicrobials
CYLD	1540	cylindromatosis (turban tumor syndrome)	CDMT|CYLD1|CYLDI|EAC|FLJ20180|FLJ31664|FLJ78684|HSPC057|KIAA0849|MFT|MFT1|SBS|TEM|USPL2	16	Antimicrobials
KLKB1	3818	kallikrein B, plasma (Fletcher factor) 1	KLK3|PPK	4	Antimicrobials
CST4	1472	cystatin S	MGC71923	20	Antimicrobials
CSRP1	1465	cysteine and glycine-rich protein 1	CRP|CRP1|CSRP|CYRP|D1S181E|DKFZp686M148	1	Antimicrobials
MAPK14	1432	mitogen-activated protein kinase 14	CSBP1|CSBP2|CSPB1|EXIP|Mxi2|PRKM14|PRKM15|RK|SAPK2A|p38|p38ALPHA	6	Antimicrobials
JUN	3725	jun oncogene	AP-1|AP1|c-Jun	1	Antimicrobials
ITGAV	3685	integrin, alpha V (vitronectin receptor, alpha polypeptide, antigen CD51)	CD51|DKFZp686A08142|MSK8|VNRA	2	Antimicrobials
IRF5	3663	interferon regulatory factor 5	SLEB10	7	Antimicrobials
CCR6	1235	chemokine (C-C motif) receptor 6	BN-1|CD196|CKR-L3|CKR6|CKRL3|CMKBR6|DCR2|DRY-6|GPR-CY4|GPR29|GPRCY4|STRL22	6	Antimicrobials
IL12B	3593	interleukin 12B (natural killer cell stimulatory factor 2, cytotoxic lymphocyte maturation factor 2, p40)	CLMF|CLMF2|IL-12B|NKSF|NKSF2	5	Antimicrobials
TLR8	51311	toll-like receptor 8	CD288|MGC119599|MGC119600	X	Antimicrobials
GNLY	10578	granulysin	519|D2S69E|LAG-2|LAG2|NKG5|TLA519	2	Antimicrobials
CD81	975	CD81 molecule	S5.7|TAPA1|TSPAN28	11	Antimicrobials
EIF2AK2	5610	eukaryotic translation initiation factor 2-alpha kinase 2	EIF2AK1|MGC126524|PKR|PRKR	2	Antimicrobials
APOM	55937	apolipoprotein M	G3a|HSPC336|MGC22400|NG20	6	Antimicrobials
CACYBP	27101	calcyclin binding protein	GIG5|MGC87971|PNAS-107|RP1-102G20.6|S100A6BP|SIP	1	Antimicrobials
NOD1	10392	nucleotide-binding oligomerization domain containing 1	CARD4|CLR7.1|NLRC1	7	Antimicrobials
MAPK8	5599	mitogen-activated protein kinase 8	JNK|JNK1|JNK1A2|JNK21B1/2|PRKM8|SAPK1	10	Antimicrobials
MAPK3	5595	mitogen-activated protein kinase 3	ERK1|HS44KDAP|HUMKER1A|MGC20180|P44ERK1|P44MAPK|PRKM3	16	Antimicrobials
BST2	684	bone marrow stromal cell antigen 2	CD317	19	Antimicrobials
BPHL	670	biphenyl hydrolase-like (serine hydrolase)	BPH-RP|MCNAA|MGC125930|MGC41865|VACVASE	6	Antimicrobials
PLA2G2A	5320	phospholipase A2, group IIA (platelets, synovial fluid)	MOM1|PLA2|PLA2B|PLA2L|PLA2S|PLAS1|sPLA2	1	Antimicrobials
GRN	2896	granulin	GEP|GP88|PCDGF|PEPI|PGRN	17	Antimicrobials
NEWENTRY	192343	Record to support submission of GeneRIFs for a gene not in Entrez Gene (human; man).	-	-	Antimicrobials
PDGFRA	5156	platelet-derived growth factor receptor, alpha polypeptide	CD140A|MGC74795|PDGFR2|Rhe-PDGFRA	4	Antimicrobials
GNAI1	2770	guanine nucleotide binding protein (G protein), alpha inhibiting activity polypeptide 1	Gi	7	Antimicrobials
WNT5A	7474	wingless-type MMTV integration site family, member 5A	hWNT5A	3	Antimicrobials
FURIN	5045	furin (paired basic amino acid cleaving enzyme)	FUR|PACE|PCSK3|SPC1	15	Antimicrobials
ADAR	103	adenosine deaminase, RNA-specific	ADAR1|DRADA|DSH|DSRAD|G1P1|IFI-4|IFI4|K88dsRBP|p136	1	Antimicrobials
TYK2	7297	tyrosine kinase 2	JTK1	19	Antimicrobials
NOS2	4843	nitric oxide synthase 2, inducible	HEP-NOS|INOS|NOS|NOS2A	17	Antimicrobials
TRAF3	7187	TNF receptor-associated factor 3	CAP-1|CD40bp|CRAF1|LAP1	14	Antimicrobials
TPT1	7178	tumor protein, translationally-controlled 1	FLJ27337|HRF|TCTP|p02	13	Antimicrobials
TPM2	7169	tropomyosin 2 (beta)	AMCD1|DA1|DA2B|TMSB	9	Antimicrobials
NEO1	4756	neogenin homolog 1 (chicken)	DKFZp547A066|DKFZp547B146|HsT17534|IGDCC2|NGN	15	Antimicrobials
AHNAK	79026	AHNAK nucleoprotein	AHNAKRS|MGC5395	11	Antimicrobials
TLR1	7096	toll-like receptor 1	CD281|DKFZp547I0610|DKFZp564I0682|KIAA0012|MGC104956|MGC126311|MGC126312|TIL|rsc786	4	Antimicrobials
TK2	7084	thymidine kinase 2, mitochondrial	-	16	Antimicrobials
PRDX2	7001	peroxiredoxin 2	MGC4104|NKEFB|PRP|PRX2|PRXII|TDPX1|TSA	19	Antimicrobials
MX2	4600	myxovirus (influenza virus) resistance 2 (mouse)	MXB	21	Antimicrobials
FGF2	2247	fibroblast growth factor 2 (basic)	BFGF|FGFB|HBGF-2	4	Antimicrobials
FGA	2243	fibrinogen alpha chain	Fib2|MGC119422|MGC119423|MGC119425	4	Antimicrobials
TCF7L2	6934	transcription factor 7-like 2 (T-cell specific, HMG-box)	TCF-4|TCF4	10	Antimicrobials
F2RL1	2150	coagulation factor II (thrombin) receptor-like 1	GPR11|PAR2	5	Antimicrobials
DAK	26007	dihydroxyacetone kinase 2 homolog (S. cerevisiae)	DKFZp586B1621|MGC5621	11	Antimicrobials
MSR1	4481	macrophage scavenger receptor 1	CD204|SCARA1|SR-A|phSR1|phSR2	8	Antimicrobials
NFKBIZ	64332	nuclear factor of kappa light polypeptide gene enhancer in B-cells inhibitor, zeta	FLJ30225|FLJ34463|IKBZ|INAP|MAIL	3	Antimicrobials
LMBR1	64327	limb region 1 homolog (mouse)	ACHP|C7orf2|DIF14|FLJ11665|PPD2|TPT	7	Antimicrobials
SPINLW1	57119	serine peptidase inhibitor-like, with Kunitz and WAP domains 1 (eppin)	EPPIN|EPPIN1|EPPIN2|EPPIN3|WAP7|WFDC7|dJ461P17.2	20	Antimicrobials
SRC	6714	v-src sarcoma (Schmidt-Ruppin A-2) viral oncogene homolog (avian)	ASV|SRC1|c-SRC|p60-Src	20	Antimicrobials
MPO	4353	myeloperoxidase	-	17	Antimicrobials
ELAVL1	1994	ELAV (embryonic lethal, abnormal vision, Drosophila)-like 1 (Hu antigen R)	ELAV1|HUR|Hua|MelG	19	Antimicrobials
ROBO3	64221	roundabout, axon guidance receptor, homolog 3 (Drosophila)	FLJ21044|HGPPS|HGPS|RBIG1|RIG1	11	Antimicrobials
SP1	6667	Sp1 transcription factor	-	12	Antimicrobials
SOD1	6647	superoxide dismutase 1, soluble	ALS|ALS1|IPOA|SOD|homodimer	21	Antimicrobials
PDF	64146	peptide deformylase (mitochondrial)	-	16	Antimicrobials
DLL4	54567	delta-like 4 (Drosophila)	MGC126344|hdelta2	15	Antimicrobials
ECD	11319	ecdysoneless homolog (Drosophila)	GCR2|HSGT1	10	Antimicrobials
SLC11A1	6556	solute carrier family 11 (proton-coupled divalent metal ion transporters), member 1	LSH|NRAMP|NRAMP1	2	Antimicrobials
DMBT1	1755	deleted in malignant brain tumors 1	GP340|MGC164738|muclin	10	Antimicrobials
TMEM173	340061	transmembrane protein 173	FLJ38577|MITA|MPYS|STING	5	Antimicrobials
SKIV2L	6499	superkiller viralicidic activity 2-like (S. cerevisiae)	170A|DDX13|HLP|SKI2|SKI2W|SKIV2	6	Antimicrobials
SEMG2	6407	semenogelin II	SGII	20	Antimicrobials
LTA	4049	lymphotoxin alpha (TNF superfamily, member 1)	LT|TNFB|TNFSF1	6	Antimicrobials
DES	1674	desmin	CMD1I|CSM1|CSM2|FLJ12025|FLJ39719|FLJ41013|FLJ41793	2	Antimicrobials
DCK	1633	deoxycytidine kinase	MGC117410|MGC138632	4	Antimicrobials
DAXX	1616	death-domain associated protein	BING2|DAP6|EAP1|MGC126245|MGC126246	6	Antimicrobials
TNFRSF10A	8797	tumor necrosis factor receptor superfamily, member 10a	APO2|CD261|DR4|MGC9365|TRAILR-1|TRAILR1	8	Antimicrobials
TNFRSF10B	8795	tumor necrosis factor receptor superfamily, member 10b	CD262|DR5|KILLER|KILLER/DR5|TRAIL-R2|TRAILR2|TRICK2|TRICK2A|TRICK2B|TRICKB|ZTNFR9	8	Antimicrobials
EED	8726	embryonic ectoderm development	HEED|WAIT1	11	Antimicrobials
CCL4	6351	chemokine (C-C motif) ligand 4	ACT2|AT744.1|G-26|LAG1|MGC104418|MGC126025|MGC126026|MIP-1-beta|MIP1B|MIP1B1|SCYA2|SCYA4	17	Antimicrobials
LIMS1	3987	LIM and senescent cell antigen-like domains 1	PINCH|PINCH1	2	Antimicrobials
LALBA	3906	lactalbumin, alpha-	MGC138521|MGC138523	12	Antimicrobials
APOBEC3H	164668	apolipoprotein B mRNA editing enzyme, catalytic polypeptide-like 3H	ARP10|dJ742C19.2	22	Antimicrobials
TMPRSS6	164656	transmembrane protease, serine 6	IRIDA	22	Antimicrobials
SPINK5	11005	serine peptidase inhibitor, Kazal type 5	DKFZp686K19184|FLJ21544|FLJ97536|FLJ97596|FLJ99794|LEKTI|LETKI|NETS|NS|VAKTI	5	Antimicrobials
MARCO	8685	macrophage receptor with collagenous structure	SCARA2	2	Antimicrobials
BECN1	8678	beclin 1, autophagy related	ATG6|VPS30|beclin1	17	Antimicrobials
TNFSF11	8600	tumor necrosis factor (ligand) superfamily, member 11	CD254|ODF|OPGL|OPTB2|RANKL|TRANCE|hRANKL2|sOdf	13	Antimicrobials
KNG1	3827	kininogen 1	BDK|KNG	3	Antimicrobials
CSK	1445	c-src tyrosine kinase	MGC117393	15	Antimicrobials
KLRK1	22914	killer cell lectin-like receptor subfamily K, member 1	CD314|D12S2489E|FLJ17759|FLJ75772|KLR|NKG2-D|NKG2D	12	Antimicrobials
KCNH2	3757	potassium voltage-gated channel, subfamily H (eag-related), member 2	ERG1|HERG|HERG1|Kv11.1|LQT2|SQT1	7	Antimicrobials
JUND	3727	jun D proto-oncogene	AP-1	19	Antimicrobials
JAK1	3716	Janus kinase 1	JAK1A|JAK1B|JTK3	1	Antimicrobials
CREB1	1385	cAMP responsive element binding protein 1	CREB|MGC9284	2	Antimicrobials
CLDN4	1364	claudin 4	CPE-R|CPER|CPETR|CPETR1|WBSCR8|hCPE-R	7	Antimicrobials
CCL28	56477	chemokine (C-C motif) ligand 28	CCK1|MEC|MGC71902|SCYA28	5	Antimicrobials
RNASE3	6037	ribonuclease, RNase A family, 3 (eosinophil cationic protein)	ECP|RNS3	14	Antimicrobials
RN7SL1	6029	RNA, 7SL, cytoplasmic 1	7L1a|7SL|RN7SL|RNSRP1	14	Antimicrobials
IRF7	3665	interferon regulatory factor 7	IRF-7H|IRF7A	11	Antimicrobials
IREB2	3658	iron-responsive element binding protein 2	ACO3|FLJ23381|IRP2|IRP2AD	15	Antimicrobials
ILK	3611	integrin-linked kinase	DKFZp686F1765|P59	11	Antimicrobials
IL18	3606	interleukin 18 (interferon-gamma-inducing factor)	IGIF|IL-18|IL-1g|IL1F4|MGC12320	11	Antimicrobials
IL17A	3605	interleukin 17A	CTLA8|IL-17|IL-17A|IL17	6	Antimicrobials
LTB4R	1241	leukotriene B4 receptor	BLT1|BLTR|CMKRL1|GPR16|LTB4R1|LTBR1|P2RY7|P2Y7	14	Antimicrobials
APOBEC3A	200315	apolipoprotein B mRNA editing enzyme, catalytic polypeptide-like 3A	ARP3|PHRBN|bK150C2.1	22	Antimicrobials
MASP2	10747	mannan-binding lectin serine peptidase 2	MAP19|MASP-2|sMAP	1	Antimicrobials
TRIM27	5987	tripartite motif-containing 27	RFP|RNF76	6	Antimicrobials
RELA	5970	v-rel reticuloendotheliosis viral oncogene homolog A (avian)	MGC131774|NFKB3|p65	11	Antimicrobials
IL7R	3575	interleukin 7 receptor	CD127|CDW127|IL-7R-alpha|IL7RA|ILRA	5	Antimicrobials
IL1A	3552	interleukin 1, alpha	IL-1A|IL1|IL1-ALPHA|IL1F1	2	Antimicrobials
PTX3	5806	pentraxin-related gene, rapidly induced by IL-1 beta	TNFAIP5|TSG-14	3	Antimicrobials
IFNAR2	3455	interferon (alpha, beta and omega) receptor 2	IFN-R|IFN-alpha-REC|IFNABR|IFNARB	21	Antimicrobials
IFN1@	3438	interferon, type 1, cluster	IFNA	9	Antimicrobials
SYTL1	84958	synaptotagmin-like 1	FLJ14996|JFC1|SLP1	1	Antimicrobials
APOBEC3C	27350	apolipoprotein B mRNA editing enzyme, catalytic polypeptide-like 3C	APOBEC1L|ARDC2|ARDC4|ARP5|MGC19485|PBI|bK150C2.3	22	Antimicrobials
DDX17	10521	DEAD (Asp-Glu-Ala-Asp) box polypeptide 17	DKFZp761H2016|P72|RH70	22	Antimicrobials
PTGS2	5743	prostaglandin-endoperoxide synthase 2 (prostaglandin G/H synthase and cyclooxygenase)	COX-2|COX2|GRIPGHS|PGG/HS|PGHS-2|PHS-2|hCox-2	1	Antimicrobials
HTR1A	3350	5-hydroxytryptamine (serotonin) receptor 1A	5-HT1A|5HT1a|ADRB2RL1|ADRBRL1	5	Antimicrobials
SEPT-7	989	septin 7	CDC10|CDC3|Nbla02942|SEPT7A	7	Antimicrobials
CD40LG	959	CD40 ligand	CD154|CD40L|HIGM1|IGM|IMD3|T-BAM|TNFSF5|TRAP|gp39|hCD40L	X	Antimicrobials
CD14	929	CD14 molecule	-	5	Antimicrobials
CD8A	925	CD8a molecule	CD8|Leu2|MAL|p32	2	Antimicrobials
CD4	920	CD4 molecule	CD4mut	12	Antimicrobials
MASP1	5648	mannan-binding lectin serine peptidase 1 (C4/C2 activating component of Ra-reactive factor)	CRARF|CRARF1|DKFZp686I01199|FLJ26383|MASP|MGC126283|MGC126284|PRSS5|RaRF	3	Antimicrobials
PROC	5624	protein C (inactivator of coagulation factors Va and VIIIa)	PC|PROC1	2	Antimicrobials
MAP2K2	5605	mitogen-activated protein kinase kinase 2	FLJ26075|MAPKK2|MEK2|MKK2|PRKMK2	19	Antimicrobials
MAP2K1	5604	mitogen-activated protein kinase kinase 1	MAPKK1|MEK1|MKK1|PRKMK1	15	Antimicrobials
HRG	3273	histidine-rich glycoprotein	DKFZp779H1622|HPRG|HRGP	3	Antimicrobials
NDRG1	10397	N-myc downstream regulated 1	CAP43|CMT4D|DRG1|GC4|HMSNL|NDR1|NMSL|PROXY1|RIT42|RTP|TARG1|TDD5	8	Antimicrobials
IRF9	10379	interferon regulatory factor 9	IRF-9|ISGF3|ISGF3G|p48	14	Antimicrobials
TRIM22	10346	tripartite motif-containing 22	GPSTAF50|RNF94|STAF50	11	Antimicrobials
LANCL1	10314	LanC lantibiotic synthetase component C-like 1 (bacterial)	GPR69A|p40	2	Antimicrobials
PPP4C	5531	protein phosphatase 4 (formerly X), catalytic subunit	PP4|PPH3|PPX	16	Antimicrobials
HMOX1	3162	heme oxygenase (decycling) 1	HO-1|HSP32|bK286B10	22	Antimicrobials
HMGB1	3146	high-mobility group box 1	DKFZp686A04236|HMG1|HMG3|SBP-1	13	Antimicrobials
HLA-B	3106	major histocompatibility complex, class I, B	AS|HLA-B-7301|HLA-B73|HLAB|HLAC|MGC111087|SPDA1	6	Antimicrobials
RNASE7	84659	ribonuclease, RNase A family, 7	MGC133220	14	Antimicrobials
ABCC4	10257	ATP-binding cassette, sub-family C (CFTR/MRP), member 4	EST170205|MOAT-B|MOATB|MRP4	13	Antimicrobials
HGF	3082	hepatocyte growth factor (hepapoietin A; scatter factor)	F-TCF|HGFB|HPTA|SF	7	Antimicrobials
HDAC1	3065	histone deacetylase 1	DKFZp686H12203|GON-10|HD1|RPD3|RPD3L1	1	Antimicrobials
IL28RA	163702	interleukin 28 receptor, alpha (interferon, lambda receptor)	CRF2/12|IFNLR|IFNLR1|IL-28R1|LICR2	1	Antimicrobials
PLSCR1	5359	phospholipid scramblase 1	MMTRA1B	3	Antimicrobials
B2M	567	beta-2-microglobulin	-	15	Antimicrobials
BACH2	60468	BTB and CNC homology 1, basic leucine zipper transcription factor 2	-	6	Antimicrobials
TANK	10010	TRAF family member-associated NFKB activator	I-TRAF|TRAF2	2	Antimicrobials
PIK3CG	5294	phosphoinositide-3-kinase, catalytic, gamma polypeptide	PI3CG|PI3K|PI3Kgamma|PIK3	7	Antimicrobials
ARRB1	408	arrestin, beta 1	ARB1|ARR1	11	Antimicrobials
RSAD2	91543	radical S-adenosyl methionine domain containing 2	2510004L01Rik|cig33|cig5|vig1	2	Antimicrobials
STAB2	55576	stabilin 2	DKFZp434E0321|FEEL-2|FELE-2|FELL|FELL-2|FEX2|HARE|STAB-2	12	Antimicrobials
TBK1	29110	TANK-binding kinase 1	FLJ11330|NAK|T2K	12	Antimicrobials
PDYN	5173	prodynorphin	MGC26418|PENKB	20	Antimicrobials
PDGFRB	5159	platelet-derived growth factor receptor, beta polypeptide	CD140B|JTK12|PDGF-R-beta|PDGFR|PDGFR1	5	Antimicrobials
PDCD1	5133	programmed cell death 1	CD279|PD1|SLEB2|hPD-1|hPD-l	2	Antimicrobials
PCSK2	5126	proprotein convertase subtilisin/kexin type 2	NEC2|PC2|SPC2	20	Antimicrobials
PCSK1	5122	proprotein convertase subtilisin/kexin type 1	BMIQ12|NEC1|PC1|PC3|SPC3	5	Antimicrobials
ARG2	384	arginase, type II	-	14	Antimicrobials
AQP9	366	aquaporin 9	HsT17287|SSC1	15	Antimicrobials
FASLG	356	Fas ligand (TNF superfamily, member 6)	APT1LG1|CD178|CD95L|FASL|TNFSF6	1	Antimicrobials
APOH	350	apolipoprotein H (beta-2-glycoprotein I)	B2G1|BG	17	Antimicrobials
BIRC5	332	baculoviral IAP repeat-containing 5	API4|EPR-1	17	Antimicrobials
ANXA6	309	annexin A6	ANX6|CBP68	5	Antimicrobials
IL22	50616	interleukin 22	IL-21|IL-22|IL-D110|IL-TIF|IL21|ILTIF|MGC79382|MGC79384|TIFIL-23|TIFa|zcyto18	12	Antimicrobials
VTN	7448	vitronectin	V75|VN|VNT	17	Antimicrobials
VIM	7431	vimentin	FLJ36605	10	Antimicrobials
VCAM1	7412	vascular cell adhesion molecule 1	CD106|DKFZp779G2333|INCAM-100|MGC99561	1	Antimicrobials
PRDX1	5052	peroxiredoxin 1	MSP23|NKEFA|PAG|PAGA|PAGB|PRX1|PRXI|TDPX2	1	Antimicrobials
GFAP	2670	glial fibrillary acidic protein	FLJ45472	17	Antimicrobials
GBP2	2634	guanylate binding protein 2, interferon-inducible	-	1	Antimicrobials
ALB	213	albumin	DKFZp779N1935|PRO0883|PRO0903|PRO1341	4	Antimicrobials
SLC29A3	55315	solute carrier family 29 (nucleoside transporters), member 3	ENT3|FLJ11160	10	Antimicrobials
OAS1	4938	2',5'-oligoadenylate synthetase 1, 40/46kDa	IFI-4|OIAS|OIASI	12	Antimicrobials
AGER	177	advanced glycosylation end product-specific receptor	MGC22357|RAGE	6	Antimicrobials
UNC93B1	81622	unc-93 homolog B1 (C. elegans)	MGC126617|UNC93|UNC93B	11	Antimicrobials
TNFSF4	7292	tumor necrosis factor (ligand) superfamily, member 4	CD134L|CD252|GP34|OX-40L|OX4OL|TXGP1	1	Antimicrobials
NOS1	4842	nitric oxide synthase 1 (neuronal)	IHPS1|NOS|nNOS	12	Antimicrobials
ACTG1	71	actin, gamma 1	ACT|ACTG|DFNA20|DFNA26	17	Antimicrobials
ACTA1	58	actin, alpha 1, skeletal muscle	ACTA|ASMA|CFTD|CFTD1|CFTDM|MPFD|NEM1|NEM2|NEM3	1	Antimicrobials
ACO1	48	aconitase 1, soluble	ACONS|IREB1|IREBP|IREBP1|IRP1	9	Antimicrobials
SERPINA3	12	serpin peptidase inhibitor, clade A (alpha-1 antiproteinase, antitrypsin), member 3	AACT|ACT|GIG24|GIG25|MGC88254	14	Antimicrobials
IL8RA	3577	interleukin 8 receptor, alpha	C-C|C-C-CKR-1|CD128|CD181|CDw128a|CKR-1|CMKAR1|CXCR1|IL8R1|IL8RBA	2	Antimicrobials
CCL15	6359	chemokine (C-C motif) ligand 15	HCC-2|HMRP-2B|LKN1|Lkn-1|MIP-1d|MIP-5|NCC-3|NCC3|SCYA15|SCYL3|SY15	17	Antimicrobials
CCL14	6358	chemokine (C-C motif) ligand 14	CC-1|CC-3|CKb1|FLJ16015|HCC-1|HCC-3|MCIF|NCC-2|NCC2|SCYA14|SCYL2|SY14	17	Antimicrobials
CCL4	6351	chemokine (C-C motif) ligand 4	ACT2|AT744.1|G-26|LAG1|MGC104418|MGC126025|MGC126026|MIP-1-beta|MIP1B|MIP1B1|SCYA2|SCYA4	17	Antimicrobials
CCL16	6360	chemokine (C-C motif) ligand 16	CKb12|HCC-4|ILINCK|LCC-1|LEC|LMC|MGC117051|Mtn-1|NCC-4|NCC4|SCYA16|SCYL4	17	Antimicrobials
CCL19	6363	chemokine (C-C motif) ligand 19	CKb11|ELC|MGC34433|MIP-3b|MIP3B|SCYA19	9	Antimicrobials
CCL13	6357	chemokine (C-C motif) ligand 13	CKb10|MCP-4|MGC17134|NCC-1|NCC1|SCYA13|SCYL1	17	Antimicrobials
CCL18	6362	chemokine (C-C motif) ligand 18 (pulmonary and activation-regulated)	AMAC-1|AMAC1|CKb7|DC-CK1|DCCK1|MIP-4|PARC|SCYA18	17	Antimicrobials
CCL17	6361	chemokine (C-C motif) ligand 17	A-152E5.3|ABCD-2|MGC138271|MGC138273|SCYA17|TARC	16	Antimicrobials
CCL26	10344	chemokine (C-C motif) ligand 26	IMAC|MGC126714|MIP-4a|MIP-4alpha|SCYA26|TSC-1	7	Antimicrobials
CCL22	6367	chemokine (C-C motif) ligand 22	A-152E5.1|ABCD-1|DC/B-CK|MDC|MGC34554|SCYA22|STCP-1	16	Antimicrobials
CCR3	1232	chemokine (C-C motif) receptor 3	CC-CKR-3|CD193|CKR3|CMKBR3|MGC102841	3	Antimicrobials
CCL28	56477	chemokine (C-C motif) ligand 28	CCK1|MEC|MGC71902|SCYA28	5	Antimicrobials
CCL4L2	388372	chemokine (C-C motif) ligand 4-like 2	AT744.2|CCL4L|SCYA4L	17	Antimicrobials
CCBP2	1238	chemokine binding protein 2	CCR10|CCR9|CMKBR9|D6|MGC126678|MGC138250|hD6	3	Antimicrobials
CCR7	1236	chemokine (C-C motif) receptor 7	BLR2|CD197|CDw197|CMKBR7|EBI1	17	Antimicrobials
CCL27	10850	chemokine (C-C motif) ligand 27	ALP|CTACK|CTAK|ESKINE|ILC|PESKY|SCYA27	9	Antimicrobials
CCR8	1237	chemokine (C-C motif) receptor 8	CDw198|CKR-L1|CKRL1|CMKBR8|CMKBRL2|CY6|GPR-CY6|MGC129966|MGC129973|TER1	3	Antimicrobials
CCRL1	51554	chemokine (C-C motif) receptor-like 1	CC-CKR-11|CCBP2|CCR10|CCR11|CCX-CKR|CKR-11|PPR1|VSHK1	3	Antimicrobials
CCR10	2826	chemokine (C-C motif) receptor 10	GPR2	17	Antimicrobials
CCL2	6347	chemokine (C-C motif) ligand 2	GDCF-2|HC11|HSMCR30|MCAF|MCP-1|MCP1|MGC9434|SCYA2|SMC-CF	17	Antimicrobials
CCL21	6366	chemokine (C-C motif) ligand 21	6Ckine|CKb9|ECL|MGC34555|SCYA21|SLC|TCA4	9	Antimicrobials
CCL7	6354	chemokine (C-C motif) ligand 7	FIC|MARC|MCP-3|MCP3|MGC138463|MGC138465|NC28|SCYA6|SCYA7	17	Antimicrobials
CCL5	6352	chemokine (C-C motif) ligand 5	D17S136E|MGC17164|RANTES|SCYA5|SISd|TCP228	17	Antimicrobials
CCL3	6348	chemokine (C-C motif) ligand 3	G0S19-1|LD78ALPHA|MIP-1-alpha|MIP1A|SCYA3	17	Antimicrobials
CCL20	6364	chemokine (C-C motif) ligand 20	CKb4|LARC|MIP-3a|MIP3A|SCYA20|ST38	2	Antimicrobials
CCL11	6356	chemokine (C-C motif) ligand 11	MGC22554|SCYA11	17	Antimicrobials
CCR5	1234	chemokine (C-C motif) receptor 5	CC-CKR-5|CCCKR5|CD195|CKR-5|CKR5|CMKBR5|FLJ78003|IDDM22	3	Antimicrobials
CCL23	6368	chemokine (C-C motif) ligand 23	CK-BETA-8|CKb8|Ckb-8|Ckb-8-1|MIP-3|MIP3|MPIF-1|SCYA23	17	Antimicrobials
CCL25	6370	chemokine (C-C motif) ligand 25	Ckb15|MGC150327|SCYA25|TECK	19	Antimicrobials
CCL1	6346	chemokine (C-C motif) ligand 1	I-309|P500|SCYA1|SISe|TCA3	17	Antimicrobials
CCL3L3	414062	chemokine (C-C motif) ligand 3-like 3	464.2|D17S1718|LD78|LD78BETA|MGC12815|SCYA3L|SCYA3L1	17	Antimicrobials
CCL4L1	9560	chemokine (C-C motif) ligand 4-like 1	AT744.2|CCL4L|LAG-1|LAG1|SCYA4L	17	Antimicrobials
CXCL12	6387	chemokine (C-X-C motif) ligand 12 (stromal cell-derived factor 1)	PBSF|SCYB12|SDF-1a|SDF-1b|SDF1|SDF1A|SDF1B|TLSF-a|TLSF-b|TPAR1	10	Antimicrobials
XCL1	6375	chemokine (C motif) ligand 1	ATAC|LPTN|LTN|SCM-1|SCM-1a|SCM1|SCYC1	1	Antimicrobials
CCL8	6355	chemokine (C-C motif) ligand 8	HC14|MCP-2|MCP2|SCYA10|SCYA8	17	Antimicrobials
CCL3L1	6349	chemokine (C-C motif) ligand 3-like 1	464.2|D17S1718|G0S19-2|LD78|LD78BETA|MGC104178|MGC12815|MGC182017|MIP1AP|SCYA3L|SCYA3L1	17	Antimicrobials
CCR1	1230	chemokine (C-C motif) receptor 1	CD191|CKR-1|CKR1|CMKBR1|HM145|MIP1aR|SCYAR1	3	Antimicrobials
CCL24	6369	chemokine (C-C motif) ligand 24	Ckb-6|MPIF-2|MPIF2|SCYA24	7	Antimicrobials
XCL2	6846	chemokine (C motif) ligand 2	SCM-1b|SCM1B|SCYC2	1	Antimicrobials
CXCL1	2919	chemokine (C-X-C motif) ligand 1 (melanoma growth stimulating activity, alpha)	FSP|GRO1|GROa|MGSA|MGSA-a|NAP-3|SCYB1	4	Antimicrobials
CXCL10	3627	chemokine (C-X-C motif) ligand 10	C7|IFI10|INP10|IP-10|SCYB10|crg-2|gIP-10|mob-1	4	Antimicrobials
CXCR4	7852	chemokine (C-X-C motif) receptor 4	CD184|D2S201E|FB22|HM89|HSY3RR|LAP3|LCR1|LESTR|NPY3R|NPYR|NPYRL|NPYY3R|WHIM	2	Antimicrobials
CXCL2	2920	chemokine (C-X-C motif) ligand 2	CINC-2a|GRO2|GROb|MGSA-b|MIP-2a|MIP2|MIP2A|SCYB2	4	Antimicrobials
CXCR6	10663	chemokine (C-X-C motif) receptor 6	BONZO|CD186|STRL33|TYMSTR	3	Antimicrobials
CCR4	1233	chemokine (C-C motif) receptor 4	CC-CKR-4|CD194|CKR4|CMKBR4|ChemR13|HGCN:14099|K5-5|MGC88293	3	Antimicrobials
CXCL11	6373	chemokine (C-X-C motif) ligand 11	H174|I-TAC|IP-9|IP9|MGC102770|SCYB11|SCYB9B|b-R1	4	Antimicrobials
FAM19A5	25817	family with sequence similarity 19 (chemokine (C-C motif)-like), member A5	QLLK5208|TAFA-5|TAFA5|UNQ5208	22	Antimicrobials
FAM19A3	284467	family with sequence similarity 19 (chemokine (C-C motif)-like), member A3	MGC138473|TAFA-3|TAFA3	1	Antimicrobials
FAM19A4	151647	family with sequence similarity 19 (chemokine (C-C motif)-like), member A4	FLJ25161|TAFA-4|TAFA4	3	Antimicrobials
FAM19A1	407738	family with sequence similarity 19 (chemokine (C-C motif)-like), member A1	TAFA-1|TAFA1	3	Antimicrobials
FAM19A2	338811	family with sequence similarity 19 (chemokine (C-C motif)-like), member A2	DKFZp761E1217|DKFZp781P0552|MGC42403|TAFA-2|TAFA2	12	Antimicrobials
CCL14-CCL15	348249	chemokine ligand 14, chemokine ligand 15 transcription unit	-	17	Antimicrobials
IL6	3569	interleukin 6 (interferon, beta 2)	BSF2|HGF|HSF|IFNB2|IL-6	7	Antimicrobials
TNF	7124	tumor necrosis factor (TNF superfamily, member 2)	DIF|TNF-alpha|TNFA|TNFSF2	6	Antimicrobials
IL1B	3553	interleukin 1, beta	IL-1|IL1-BETA|IL1F2	2	Antimicrobials
IL18	3606	interleukin 18 (interferon-gamma-inducing factor)	IGIF|IL-18|IL-1g|IL1F4|MGC12320	11	Antimicrobials
PTK2B	2185	PTK2B protein tyrosine kinase 2 beta	CADTK|CAKB|FADK2|FAK2|FRNK|PKB|PTK|PYK2|RAFTK	8	Antimicrobials
VEGFA	7422	vascular endothelial growth factor A	MGC70609|MVCD1|VEGF|VEGF-A|VPF	6	Antimicrobials
IL4	3565	interleukin 4	BCGF-1|BCGF1|BSF1|IL-4|MGC79402	5	Antimicrobials
CDH1	999	cadherin 1, type 1, E-cadherin (epithelial)	Arc-1|CD324|CDHE|ECAD|LCAM|UVO	16	Antimicrobials
CD40	958	CD40 molecule, TNF receptor superfamily member 5	Bp50|CDW40|MGC9013|TNFRSF5|p50	20	Antimicrobials
DEFB103A	55894	defensin, beta 103A	DEFB103|DEFB3|HBD-3|HBD3|HBP-3|HBP3	8	Antimicrobials
F2RL1	2150	coagulation factor II (thrombin) receptor-like 1	GPR11|PAR2	5	Antimicrobials
MMP9	4318	matrix metallopeptidase 9 (gelatinase B, 92kDa gelatinase, 92kDa type IV collagenase)	CLG4B|GELB|MMP-9	20	Antimicrobials
LTBP1	4052	latent transforming growth factor beta binding protein 1	MGC163161	2	Antimicrobials
DEFB4	1673	defensin, beta 4	DEFB-2|DEFB102|DEFB2|HBD-2|SAP1	8	Antimicrobials
TNFSF10	8743	tumor necrosis factor (ligand) superfamily, member 10	APO2L|Apo-2L|CD253|TL2|TRAIL	3	Antimicrobials
IL13	3596	interleukin 13	ALRH|BHR1|IL-13|MGC116786|MGC116788|MGC116789|P600	5	Antimicrobials
IL10	3586	interleukin 10	CSIF|IL-10|IL10A|MGC126450|MGC126451|TGIF	1	Antimicrobials
IL2	3558	interleukin 2	IL-2|TCGF|lymphokine	4	Antimicrobials
PPARG	5468	peroxisome proliferator-activated receptor gamma	CIMT1|NR1C3|PPARG1|PPARG2|PPARgamma	3	Antimicrobials
FGR	2268	Gardner-Rasheed feline sarcoma viral (v-fgr) oncogene homolog	FLJ43153|MGC75096|SRC2|c-fgr|c-src2|p55c-fgr|p58c-fgr	1	Antimicrobials
MIF	4282	macrophage migration inhibitory factor (glycosylation-inhibiting factor)	GIF|GLIF|MMIF	22	Antimicrobials
CRP	1401	C-reactive protein, pentraxin-related	MGC149895|MGC88244|PTX1	1	Antimicrobials
JAK2	3717	Janus kinase 2	JTK10	9	Antimicrobials
IL1A	3552	interleukin 1, alpha	IL-1A|IL1|IL1-ALPHA|IL1F1	2	Antimicrobials
PTK2	5747	PTK2 protein tyrosine kinase 2	FADK|FAK|FAK1|pp125FAK	8	Antimicrobials
PTGDR	5729	prostaglandin D2 receptor (DP)	AS1|ASRT1|DP|DP1|MGC49004	14	Antimicrobials
CD86	942	CD86 molecule	B7-2|B70|CD28LG2|LAB72|MGC34413	3	Antimicrobials
HCK	3055	hemopoietic cell kinase	JTK9	20	Antimicrobials
ARRB1	408	arrestin, beta 1	ARB1|ARR1	11	Antimicrobials
GNAI1	2770	guanine nucleotide binding protein (G protein), alpha inhibiting activity polypeptide 1	Gi	7	Antimicrobials
VDR	7421	vitamin D (1,25- dihydroxyvitamin D3) receptor	NR1I1	12	Antimicrobials
OLR1	4973	oxidized low density lipoprotein (lectin-like) receptor 1	CLEC8A|LOX1|SCARE1	12	Antimicrobials
ADRBK1	156	adrenergic, beta, receptor kinase 1	BARK1|BETA-ARK1|FLJ16718|GRK2	11	Antimicrobials
TXK	7294	TXK tyrosine kinase	BTKL|MGC22473|PSCTK5|PTK4|RLK|TKL	4	Antimicrobials
RNASE2	6036	ribonuclease, RNase A family, 2 (liver, eosinophil-derived neurotoxin)	EDN|RNS2	14	Antimicrobials
CD79A	973	CD79a molecule, immunoglobulin-associated alpha	IGA|MB-1	19	BCRSignalingPathway
CD79B	974	CD79b molecule, immunoglobulin-associated beta	B29|IGB	17	BCRSignalingPathway
LYN	4067	v-yes-1 Yamaguchi sarcoma viral related oncogene homolog	FLJ26625|JTK8	8	BCRSignalingPathway
SYK	6850	spleen tyrosine kinase	DKFZp313N1010|FLJ25043|FLJ37489	9	BCRSignalingPathway
BTK	695	Bruton agammaglobulinemia tyrosine kinase	AGMX1|AT|ATK|BPK|IMD1|MGC126261|MGC126262|PSCTK1|XLA	X	BCRSignalingPathway
BLNK	29760	B-cell linker	BASH|BLNK-S|LY57|MGC111051|SLP-65|SLP65	10	BCRSignalingPathway
VAV3	10451	vav 3 guanine nucleotide exchange factor	FLJ40431	1	BCRSignalingPathway
VAV1	7409	vav 1 guanine nucleotide exchange factor	VAV	19	BCRSignalingPathway
VAV2	7410	vav 2 guanine nucleotide exchange factor	-	9	BCRSignalingPathway
RAC1	5879	ras-related C3 botulinum toxin substrate 1 (rho family, small GTP binding protein Rac1)	MGC111543|MIG5|TC-25|p21-Rac1	7	BCRSignalingPathway
RAC2	5880	ras-related C3 botulinum toxin substrate 2 (rho family, small GTP binding protein Rac2)	EN-7|Gx|HSPC022	22	BCRSignalingPathway
RAC3	5881	ras-related C3 botulinum toxin substrate 3 (rho family, small GTP binding protein Rac3)	-	17	BCRSignalingPathway
PPP3CA	5530	protein phosphatase 3 (formerly 2B), catalytic subunit, alpha isoform	CALN|CALNA|CALNA1|CCN1|CNA1|PPP2B	4	BCRSignalingPathway
PPP3CB	5532	protein phosphatase 3 (formerly 2B), catalytic subunit, beta isoform	CALNA2|CALNB	10	BCRSignalingPathway
PPP3CC	5533	protein phosphatase 3 (formerly 2B), catalytic subunit, gamma isoform	CALNA3	8	BCRSignalingPathway
CHP	11261	calcium binding protein P22	SLC9A1BP	15	BCRSignalingPathway
PPP3R1	5534	protein phosphatase 3 (formerly 2B), regulatory subunit B, alpha isoform	CALNB1|CNB|CNB1	2	BCRSignalingPathway
PPP3R2	5535	protein phosphatase 3 (formerly 2B), regulatory subunit B, beta isoform	PPP3RL	9	BCRSignalingPathway
CHP2	63928	calcineurin B homologous protein 2	-	16	BCRSignalingPathway
NFAT5	10725	nuclear factor of activated T-cells 5, tonicity-responsive	KIAA0827|NF-AT5|NFATL1|NFATZ|OREBP|TONEBP	16	BCRSignalingPathway
NFATC1	4772	nuclear factor of activated T-cells, cytoplasmic, calcineurin-dependent 1	MGC138448|NF-ATC|NFAT2|NFATc	18	BCRSignalingPathway
NFATC2	4773	nuclear factor of activated T-cells, cytoplasmic, calcineurin-dependent 2	NFAT1|NFATP	20	BCRSignalingPathway
NFATC3	4775	nuclear factor of activated T-cells, cytoplasmic, calcineurin-dependent 3	NFAT4|NFATX	16	BCRSignalingPathway
NFATC4	4776	nuclear factor of activated T-cells, cytoplasmic, calcineurin-dependent 4	NF-ATc4|NFAT3	14	BCRSignalingPathway
HRAS	3265	v-Ha-ras Harvey rat sarcoma viral oncogene homolog	C-BAS/HAS|C-H-RAS|C-HA-RAS1|CTLO|H-RASIDX|HAMSV|HRAS1|K-RAS|N-RAS|RASH1	11	BCRSignalingPathway
KRAS	3845	v-Ki-ras2 Kirsten rat sarcoma viral oncogene homolog	C-K-RAS|K-RAS2A|K-RAS2B|K-RAS4A|K-RAS4B|KI-RAS|KRAS1|KRAS2|NS3|RASK2	12	BCRSignalingPathway
NRAS	4893	neuroblastoma RAS viral (v-ras) oncogene homolog	ALPS4|N-ras|NRAS1	1	BCRSignalingPathway
FOS	2353	v-fos FBJ murine osteosarcoma viral oncogene homolog	AP-1|C-FOS	14	BCRSignalingPathway
JUN	3725	jun oncogene	AP-1|AP1|c-Jun	1	BCRSignalingPathway
CARD11	84433	caspase recruitment domain family, member 11	BIMP3|CARMA1|MGC133069	7	BCRSignalingPathway
BCL10	8915	B-cell CLL/lymphoma 10	CARMEN|CIPER|CLAP|c-E10|mE10	1	BCRSignalingPathway
MALT1	10892	mucosa associated lymphoid tissue lymphoma translocation gene 1	DKFZp434L132|MLT|MLT1	18	BCRSignalingPathway
CHUK	1147	conserved helix-loop-helix ubiquitous kinase	IKBKA|IKK-alpha|IKK1|IKKA|NFKBIKA|TCF16	10	BCRSignalingPathway
IKBKB	3551	inhibitor of kappa light polypeptide gene enhancer in B-cells, kinase beta	FLJ40509|IKK-beta|IKK2|IKKB|MGC131801|NFKBIKB	8	BCRSignalingPathway
IKBKG	8517	inhibitor of kappa light polypeptide gene enhancer in B-cells, kinase gamma	AMCBX1|FIP-3|FIP3|Fip3p|IKK-gamma|IP|IP1|IP2|IPD2|NEMO	X	BCRSignalingPathway
NFKB1	4790	nuclear factor of kappa light polypeptide gene enhancer in B-cells 1	DKFZp686C01211|EBP-1|KBF1|MGC54151|NF-kappa-B|NFKB-p105|NFKB-p50|p105|p50	4	BCRSignalingPathway
RELA	5970	v-rel reticuloendotheliosis viral oncogene homolog A (avian)	MGC131774|NFKB3|p65	11	BCRSignalingPathway
NFKBIA	4792	nuclear factor of kappa light polypeptide gene enhancer in B-cells inhibitor, alpha	IKBA|MAD-3|NFKBI	14	BCRSignalingPathway
NFKBIB	4793	nuclear factor of kappa light polypeptide gene enhancer in B-cells inhibitor, beta	IKBB|TRIP9	19	BCRSignalingPathway
NFKBIE	4794	nuclear factor of kappa light polypeptide gene enhancer in B-cells inhibitor, epsilon	IKBE	6	BCRSignalingPathway
CD81	975	CD81 molecule	S5.7|TAPA1|TSPAN28	11	BCRSignalingPathway
CD19	930	CD19 molecule	B4|MGC12802	16	BCRSignalingPathway
CR2	1380	complement component (3d/Epstein Barr virus) receptor 2	C3DR|CD21|SLEB9	1	BCRSignalingPathway
PIK3R5	23533	phosphoinositide-3-kinase, regulatory subunit 5	F730038I15Rik|FOAP-2|P101-PI3K|p101	17	BCRSignalingPathway
PIK3R1	5295	phosphoinositide-3-kinase, regulatory subunit 1 (alpha)	GRB1|p85|p85-ALPHA	5	BCRSignalingPathway
PIK3R2	5296	phosphoinositide-3-kinase, regulatory subunit 2 (beta)	P85B|p85|p85-BETA	19	BCRSignalingPathway
PIK3R3	8503	phosphoinositide-3-kinase, regulatory subunit 3 (gamma)	DKFZp686P05226|FLJ41892|p55|p55-GAMMA	1	BCRSignalingPathway
PIK3CA	5290	phosphoinositide-3-kinase, catalytic, alpha polypeptide	MGC142161|MGC142163|PI3K|p110-alpha	3	BCRSignalingPathway
PIK3CB	5291	phosphoinositide-3-kinase, catalytic, beta polypeptide	DKFZp779K1237|MGC133043|PI3K|PI3KCB|PI3Kbeta|PIK3C1|p110-BETA	3	BCRSignalingPathway
PIK3CD	5293	phosphoinositide-3-kinase, catalytic, delta polypeptide	p110D	1	BCRSignalingPathway
PIK3CG	5294	phosphoinositide-3-kinase, catalytic, gamma polypeptide	PI3CG|PI3K|PI3Kgamma|PIK3	7	BCRSignalingPathway
AKT3	10000	v-akt murine thymoma viral oncogene homolog 3 (protein kinase B, gamma)	DKFZp434N0250|PKB-GAMMA|PKBG|PRKBG|RAC-PK-gamma|RAC-gamma|STK-2	1	BCRSignalingPathway
AKT1	207	v-akt murine thymoma viral oncogene homolog 1	AKT|MGC99656|PKB|PKB-ALPHA|PRKBA|RAC|RAC-ALPHA	14	BCRSignalingPathway
AKT2	208	v-akt murine thymoma viral oncogene homolog 2	PKBB|PKBBETA|PRKBB|RAC-BETA	19	BCRSignalingPathway
GSK3B	2932	glycogen synthase kinase 3 beta	-	3	BCRSignalingPathway
INPP5D	3635	inositol polyphosphate-5-phosphatase, 145kDa	MGC104855|MGC142140|MGC142142|SHIP|SHIP1|SIP-145|hp51CN	2	BCRSignalingPathway
CD22	933	CD22 molecule	FLJ22814|MGC130020|SIGLEC-2|SIGLEC2	19	BCRSignalingPathway
CD72	971	CD72 molecule	CD72b|LYB2	9	BCRSignalingPathway
PTPN6	5777	protein tyrosine phosphatase, non-receptor type 6	HCP|HCPH|HPTP1C|PTP-1C|SH-PTP1|SHP-1|SHP-1L|SHP1	12	BCRSignalingPathway
LILRB3	11025	leukocyte immunoglobulin-like receptor, subfamily B (with TM and ITIM domains), member 3	CD85A|HL9|ILT5|LIR-3|LIR3|MGC138403|PIRB	19	BCRSignalingPathway
FCGR2B	2213	Fc fragment of IgG, low affinity IIb, receptor (CD32)	CD32|CD32B|FCG2|FCGR2|IGFR2	1	BCRSignalingPathway
RASGRP3	25780	RAS guanyl releasing protein 3 (calcium and DAG-regulated)	GRP3|KIAA0846	2	BCRSignalingPathway
PLCG2	5336	phospholipase C, gamma 2 (phosphatidylinositol-specific)	-	16	BCRSignalingPathway
PRKCB	5579	protein kinase C, beta	MGC41878|PKC-beta|PKCB|PRKCB1|PRKCB2	16	BCRSignalingPathway
IFITM1	8519	interferon induced transmembrane protein 1 (9-27)	9-27|CD225|IFI17|LEU13	11	BCRSignalingPathway
IGH@	3492	immunoglobulin heavy locus	DKFZp686C15213|IGH|IGH.1@|IGHDY1|MGC72071|MGC88774	14	BCRSignalingPathway
IGHA1	3493	immunoglobulin heavy constant alpha 1	FLJ14473|FLJ35065|FLJ35500|FLJ36402|FLJ39698|FLJ40001|FLJ41548|FLJ41552|FLJ41789|FLJ43248|FLJ43594|FLJ44293|FLJ46028|FLJ46621|FLJ46724|FLJ46811|FLJ46824|FLJ90170|IgA1|MGC102857	14	BCRSignalingPathway
IGHA2	3494	immunoglobulin heavy constant alpha 2 (A2m marker)	-	14	BCRSignalingPathway
IGHD	3495	immunoglobulin heavy constant delta	FLJ00382|FLJ46727|MGC29633	14	BCRSignalingPathway
IGHD@	50648	immunoglobulin heavy diversity group	IGD1|IGHDY1	14	BCRSignalingPathway
IGHD1-1	28510	immunoglobulin heavy diversity 1-1	IGHD11	14	BCRSignalingPathway
IGHD1-14	28508	immunoglobulin heavy diversity 1-14 (non-functional)	DM2|IGHD114	14	BCRSignalingPathway
IGHD1-20	28507	immunoglobulin heavy diversity 1-20	IGHD120	14	BCRSignalingPathway
IGHD1-26	28506	immunoglobulin heavy diversity 1-26	IGHD126	14	BCRSignalingPathway
IGHD1-7	28509	immunoglobulin heavy diversity 1-7	DM1|IGHD17	14	BCRSignalingPathway
IGHD2-15	28503	immunoglobulin heavy diversity 2-15	D2|IGHD215	14	BCRSignalingPathway
IGHD2-2	28505	immunoglobulin heavy diversity 2-2	IGHD22	14	BCRSignalingPathway
IGHD2-21	28502	immunoglobulin heavy diversity 2-21	IGHD221	14	BCRSignalingPathway
IGHD2-8	28504	immunoglobulin heavy diversity 2-8	DLR1|IGHD28	14	BCRSignalingPathway
IGHD3-10	28499	immunoglobulin heavy diversity 3-10	DXP'1|IGHD310	14	BCRSignalingPathway
IGHD3-16	28498	immunoglobulin heavy diversity 3-16	IGHD316	14	BCRSignalingPathway
IGHD3-22	28497	immunoglobulin heavy diversity 3-22	IGHD322	14	BCRSignalingPathway
IGHD3-3	28501	immunoglobulin heavy diversity 3-3	DXP4|IGHD33	14	BCRSignalingPathway
IGHD3-9	28500	immunoglobulin heavy diversity 3-9	DXP1|IGHD39	14	BCRSignalingPathway
IGHD4-11	28495	immunoglobulin heavy diversity 4-11 (non-functional)	DA1|IGHD411	14	BCRSignalingPathway
IGHD4-17	28494	immunoglobulin heavy diversity 4-17	IGHD417	14	BCRSignalingPathway
IGHD4-23	28493	immunoglobulin heavy diversity 4-23 (non-functional)	IGHD423	14	BCRSignalingPathway
IGHD4-4	28496	immunoglobulin heavy diversity 4-4	DA4|IGHD44	14	BCRSignalingPathway
IGHD5-12	28491	immunoglobulin heavy diversity 5-12	DK1|IGHD512	14	BCRSignalingPathway
IGHD5-18	28490	immunoglobulin heavy diversity 5-18	IGHD518	14	BCRSignalingPathway
IGHD5-24	28489	immunoglobulin heavy diversity 5-24 (non-functional)	IGHD524	14	BCRSignalingPathway
IGHD5-5	28492	immunoglobulin heavy diversity 5-5	DK4|IGHD55	14	BCRSignalingPathway
IGHD6-13	28487	immunoglobulin heavy diversity 6-13	DN1|IGHD613	14	BCRSignalingPathway
IGHD6-19	28486	immunoglobulin heavy diversity 6-19	IGHD619	14	BCRSignalingPathway
IGHD6-25	28485	immunoglobulin heavy diversity 6-25	IGHD625	14	BCRSignalingPathway
IGHD6-6	28488	immunoglobulin heavy diversity 6-6	D(N4)|IGHD66	14	BCRSignalingPathway
IGHD7-27	28484	immunoglobulin heavy diversity 7-27	DHQ52|IGHD727	14	BCRSignalingPathway
IGHE	3497	immunoglobulin heavy constant epsilon	IgE	14	BCRSignalingPathway
IGHG1	3500	immunoglobulin heavy constant gamma 1 (G1m marker)	-	14	BCRSignalingPathway
IGHG2	3501	immunoglobulin heavy constant gamma 2 (G2m marker)	DKFZp686I04196	14	BCRSignalingPathway
IGHG3	3502	immunoglobulin heavy constant gamma 3 (G3m marker)	DKFZp686H11213|FLJ39988|FLJ40036|FLJ40253|FLJ40587|FLJ40789|FLJ40834|IgG3|MGC45809	14	BCRSignalingPathway
IGHG4	3503	immunoglobulin heavy constant gamma 4 (G4m marker)	MGC117419	14	BCRSignalingPathway
IGHJ@	3506	immunoglobulin heavy joining group	IGHJ	14	BCRSignalingPathway
IGHJ1	28483	immunoglobulin heavy joining 1	JH1	14	BCRSignalingPathway
IGHJ2	28481	immunoglobulin heavy joining 2	JH2	14	BCRSignalingPathway
IGHJ3	28479	immunoglobulin heavy joining 3	JH3b	14	BCRSignalingPathway
IGHJ4	28477	immunoglobulin heavy joining 4	JH4b	14	BCRSignalingPathway
IGHJ5	28476	immunoglobulin heavy joining 5	JH5b	14	BCRSignalingPathway
IGHJ6	28475	immunoglobulin heavy joining 6	JH6b	14	BCRSignalingPathway
IGHM	3507	immunoglobulin heavy constant mu	DKFZp686I15196|DKFZp686I15212|FLJ00385|MGC104996|MGC52291|MU|VH	14	BCRSignalingPathway
IGHV@	3509	immunoglobulin heavy variable group	IGHV	14	BCRSignalingPathway
IGHV1-18	28468	immunoglobulin heavy variable 1-18	IGHV118	14	BCRSignalingPathway
IGHV1-2	28474	immunoglobulin heavy variable 1-2	IGHV12	14	BCRSignalingPathway
IGHV1-24	28467	immunoglobulin heavy variable 1-24	IGHV124|VH	14	BCRSignalingPathway
IGHV1-3	28473	immunoglobulin heavy variable 1-3	IGHV13	14	BCRSignalingPathway
IGHV1-45	28466	immunoglobulin heavy variable 1-45	IGHV145|VH	14	BCRSignalingPathway
IGHV1-46	28465	immunoglobulin heavy variable 1-46	IGHV146	14	BCRSignalingPathway
IGHV1-58	28464	immunoglobulin heavy variable 1-58	IGHV158|VH	14	BCRSignalingPathway
IGHV1-69	28461	immunoglobulin heavy variable 1-69	IGHV1-E|IGHV169|IGHV1E	14	BCRSignalingPathway
IGHV1-8	28472	immunoglobulin heavy variable 1-8	IGHV18	14	BCRSignalingPathway
IGHV1-C	28460	immunoglobulin heavy variable 1-C (provisional, non-functional)	IGHV1C	14	BCRSignalingPathway
IGHV1-F	28458	immunoglobulin heavy variable 1-F (provisional)	IGHV1F	14	BCRSignalingPathway
IGHV2-26	28455	immunoglobulin heavy variable 2-26	IGHV226|VH	14	BCRSignalingPathway
IGHV2-5	28457	immunoglobulin heavy variable 2-5	IGHV25|VH	14	BCRSignalingPathway
IGHV2-70	28454	immunoglobulin heavy variable 2-70	IGHV270|VH	14	BCRSignalingPathway
IGHV3-11	28450	immunoglobulin heavy variable 3-11 (gene/pseudogene)	IGHV311|VH	14	BCRSignalingPathway
IGHV3-13	28449	immunoglobulin heavy variable 3-13	IGHV313	14	BCRSignalingPathway
IGHV3-15	28448	immunoglobulin heavy variable 3-15	IGHV315|VH	14	BCRSignalingPathway
IGHV3-16	28447	immunoglobulin heavy variable 3-16 (non-functional)	IGHV316|VH	14	BCRSignalingPathway
IGHV3-20	28445	immunoglobulin heavy variable 3-20	IGHV320|VH	14	BCRSignalingPathway
IGHV3-21	28444	immunoglobulin heavy variable 3-21	IGHV321|VH	14	BCRSignalingPathway
IGHV3-23	28442	immunoglobulin heavy variable 3-23	DP47|IGHV323|V3-23|VH26	14	BCRSignalingPathway
IGHV3-30	28439	immunoglobulin heavy variable 3-30	IGHV330|VH	14	BCRSignalingPathway
IGHV3-30-3	57290	immunoglobulin heavy variable 3-30-3	IGHV3-3|IGHV3303	14	BCRSignalingPathway
IGHV3-30-5	89770	immunoglobulin heavy variable 3-30-5	IGHV3-3|IGHV3305	14	BCRSignalingPathway
IGHV3-33	28434	immunoglobulin heavy variable 3-33	IGHV333|VH	14	BCRSignalingPathway
IGHV3-35	28432	immunoglobulin heavy variable 3-35 (non-functional)	IGHV335|VH	14	BCRSignalingPathway
IGHV3-38	28429	immunoglobulin heavy variable 3-38 (non-functional)	IGHV338|VH	14	BCRSignalingPathway
IGHV3-43	28426	immunoglobulin heavy variable 3-43	IGHV343|VH	14	BCRSignalingPathway
IGHV3-48	28424	immunoglobulin heavy variable 3-48	IGHV348|VH	14	BCRSignalingPathway
IGHV3-49	28423	immunoglobulin heavy variable 3-49	IGHV349|VH	14	BCRSignalingPathway
IGHV3-53	28420	immunoglobulin heavy variable 3-53	IGHV353|VH	14	BCRSignalingPathway
IGHV3-64	28414	immunoglobulin heavy variable 3-64	IGHV364|VH	14	BCRSignalingPathway
IGHV3-66	28412	immunoglobulin heavy variable 3-66	IGHV366|VH	14	BCRSignalingPathway
IGHV3-7	28452	immunoglobulin heavy variable 3-7	IGHV37|VH	14	BCRSignalingPathway
IGHV3-72	28410	immunoglobulin heavy variable 3-72	IGHV372|VH	14	BCRSignalingPathway
IGHV3-73	28409	immunoglobulin heavy variable 3-73	IGHV373|VH	14	BCRSignalingPathway
IGHV3-74	28408	immunoglobulin heavy variable 3-74	IGHV374|VH	14	BCRSignalingPathway
IGHV3-9	28451	immunoglobulin heavy variable 3-9	IGHV39|VH	14	BCRSignalingPathway
IGHV3-D	28404	immunoglobulin heavy variable 3-D (provisional)	IGHV3D	14	BCRSignalingPathway
IGHV3-H	28402	immunoglobulin heavy variable 3-H pseudogene (provisional)	IGHV3H	14	BCRSignalingPathway
IGHV4-28	28400	immunoglobulin heavy variable 4-28	IGHV428|VH	14	BCRSignalingPathway
IGHV4-30-1	28399	immunoglobulin heavy variable 4-30-1	IGHV4-3	14	BCRSignalingPathway
IGHV4-30-2	28398	immunoglobulin heavy variable 4-30-2	IGHV4-3|IGHV4302	14	BCRSignalingPathway
IGHV4-30-4	28397	immunoglobulin heavy variable 4-30-4	IGHV4-3|IGHV4304	14	BCRSignalingPathway
IGHV4-31	28396	immunoglobulin heavy variable 4-31	FLJ45507|IGHV431	14	BCRSignalingPathway
IGHV4-34	28395	immunoglobulin heavy variable 4-34	IGHV434|VH	14	BCRSignalingPathway
IGHV4-39	28394	immunoglobulin heavy variable 4-39	IGHV439|VH	14	BCRSignalingPathway
IGHV4-4	28401	immunoglobulin heavy variable 4-4	IGHV44|VH	14	BCRSignalingPathway
IGHV4-59	28392	immunoglobulin heavy variable 4-59	IGHV459|VH	14	BCRSignalingPathway
IGHV4-61	28391	immunoglobulin heavy variable 4-61	IGHV461|VH	14	BCRSignalingPathway
IGHV4-B	28389	immunoglobulin heavy variable 4-B (provisional)	IGHV4B	14	BCRSignalingPathway
IGHV5-51	28388	immunoglobulin heavy variable 5-51	IGHV551|VH	14	BCRSignalingPathway
IGHV5-A	28386	immunoglobulin heavy variable 5-A (provisional, gene/pseudogene)	IGHV5A	14	BCRSignalingPathway
IGHV6-1	28385	immunoglobulin heavy variable 6-1	IGHV61|VH	14	BCRSignalingPathway
IGHV7-4-1	57289	immunoglobulin heavy variable 7-4-1	IGHV7-41|IGHV741	14	BCRSignalingPathway
IGHV7-81	28378	immunoglobulin heavy variable 7-81 (non-functional)	IGHV781	14	BCRSignalingPathway
IGK@	50802	immunoglobulin kappa locus	FLJ26296|IGK|IGKC|MGC22645|MGC27376|MGC40426|MGC71990	2	BCRSignalingPathway
IGKC	3514	immunoglobulin kappa constant	HCAK1|Km|MGC111575|MGC62011|MGC72072|MGC88770|MGC88771|MGC88809	2	BCRSignalingPathway
IGKDEL	3515	immunoglobulin kappa deleting element or like	IGKDE	2	BCRSignalingPathway
IGKJ@	7842	immunoglobulin kappa joining group	IGKJ	2	BCRSignalingPathway
IGKJ1	28950	immunoglobulin kappa joining 1	J1	2	BCRSignalingPathway
IGKJ2	28949	immunoglobulin kappa joining 2	J2	2	BCRSignalingPathway
IGKJ3	28948	immunoglobulin kappa joining 3	J3	2	BCRSignalingPathway
IGKJ4	28947	immunoglobulin kappa joining 4	J4	2	BCRSignalingPathway
IGKJ5	28946	immunoglobulin kappa joining 5	J5	2	BCRSignalingPathway
IGKV@	3519	immunoglobulin kappa variable group	IGKV|IGKV1|IGKV1@|IGKV2|IGKV2@|IGKV3|IGKV3@	2	BCRSignalingPathway
IGKV1-12	28940	immunoglobulin kappa variable 1-12	IGKV112|L19	2	BCRSignalingPathway
IGKV1-13	28939	immunoglobulin kappa variable 1-13 (gene/pseudogene)	IGKV113|L18	2	BCRSignalingPathway
IGKV1-16	28938	immunoglobulin kappa variable 1-16	IGKV116|L1	2	BCRSignalingPathway
IGKV1-17	28937	immunoglobulin kappa variable 1-17	A30|IGKV117	2	BCRSignalingPathway
IGKV1-27	28935	immunoglobulin kappa variable 1-27	A20|IGKV127	2	BCRSignalingPathway
IGKV1-33	28933	immunoglobulin kappa variable 1-33	IGKV133|O18	2	BCRSignalingPathway
IGKV1-37	28931	immunoglobulin kappa variable 1-37 (non-functional)	IGKV137|O14	2	BCRSignalingPathway
IGKV1-39	28930	immunoglobulin kappa variable 1-39 (gene/pseudogene)	IGKV139|O12|O12a	2	BCRSignalingPathway
IGKV1-5	28299	immunoglobulin kappa variable 1-5	IGKV|IGKV15|L12|L12a|MGC22745|MGC32715|MGC88810|V1	2	BCRSignalingPathway
IGKV1-6	28943	immunoglobulin kappa variable 1-6	IGKV16|L11	2	BCRSignalingPathway
IGKV1-8	28942	immunoglobulin kappa variable 1-8	IGKV18|L9	2	BCRSignalingPathway
IGKV1-9	28941	immunoglobulin kappa variable 1-9	IGKV19|L8	2	BCRSignalingPathway
IGKV1D-12	28903	immunoglobulin kappa variable 1D-12	IGKV1D12|L19	2	BCRSignalingPathway
IGKV1D-13	28902	immunoglobulin kappa variable 1D-13	IGKV1D13|L18	2	BCRSignalingPathway
IGKV1D-16	28901	immunoglobulin kappa variable 1D-16	IGKV1D16|L15|L15a	2	BCRSignalingPathway
IGKV1D-17	28900	immunoglobulin kappa variable 1D-17	IGKV1D17|L14	2	BCRSignalingPathway
IGKV1D-33	28896	immunoglobulin kappa variable 1D-33	IGKV1D33|O8	2	BCRSignalingPathway
IGKV1D-37	28894	immunoglobulin kappa variable 1D-37 (non-functional)	IGKV1D37|O4	2	BCRSignalingPathway
IGKV1D-39	28893	immunoglobulin kappa variable 1D-39	IGKV1D39|O2	2	BCRSignalingPathway
IGKV1D-42	28892	immunoglobulin kappa variable 1D-42 (non-functional)	IGKV1D42|L22	2	BCRSignalingPathway
IGKV1D-43	28891	immunoglobulin kappa variable 1D-43	IGKV1D43|L23|L23a	2	BCRSignalingPathway
IGKV1D-8	28904	immunoglobulin kappa variable 1D-8	IGKV1D8|L24|L24a	2	BCRSignalingPathway
IGKV2-24	28923	immunoglobulin kappa variable 2-24	A23|IGKV224	2	BCRSignalingPathway
IGKV2-28	28921	immunoglobulin kappa variable 2-28	A19|IGKV228	2	BCRSignalingPathway
IGKV2-30	28919	immunoglobulin kappa variable 2-30	A17|IGKV230	2	BCRSignalingPathway
IGKV2-40	28916	immunoglobulin kappa variable 2-40	IGKV240|O11|O11a	2	BCRSignalingPathway
IGKV2D-24	28885	immunoglobulin kappa variable 2D-24 (non-functional)	A7|IGKV2D24	2	BCRSignalingPathway
IGKV2D-28	28883	immunoglobulin kappa variable 2D-28	A3|IGKV2D28	2	BCRSignalingPathway
IGKV2D-29	28882	immunoglobulin kappa variable 2D-29	A2a|A2c|IGKV2D29	2	BCRSignalingPathway
IGKV2D-30	28881	immunoglobulin kappa variable 2D-30	A1|IGKV2D30	2	BCRSignalingPathway
IGKV2D-40	28878	immunoglobulin kappa variable 2D-40	IGKV2D40|O1	2	BCRSignalingPathway
IGKV3-11	28914	immunoglobulin kappa variable 3-11	IGKV311|L6	2	BCRSignalingPathway
IGKV3-15	28913	immunoglobulin kappa variable 3-15	IGKV315|L2	2	BCRSignalingPathway
IGKV3-20	28912	immunoglobulin kappa variable 3-20	13K18|A27|IGKV320	2	BCRSignalingPathway
IGKV3-7	28915	immunoglobulin kappa variable 3-7 (non-functional)	IGKV37|L10|L10a|Vh	2	BCRSignalingPathway
IGKV3D-11	28876	immunoglobulin kappa variable 3D-11	IGKV3D11|L20	2	BCRSignalingPathway
IGKV3D-15	28875	immunoglobulin kappa variable 3D-15 (gene/pseudogene)	IGKV3D15|L16|L16a|L16b|L16c	2	BCRSignalingPathway
IGKV3D-20	28874	immunoglobulin kappa variable 3D-20	A11|A11a|IGKV3D20	2	BCRSignalingPathway
IGKV3D-7	28877	immunoglobulin kappa variable 3D-7	IGKV3D7|L25	2	BCRSignalingPathway
IGKV4-1	28908	immunoglobulin kappa variable 4-1	B3|IGKV41	2	BCRSignalingPathway
IGKV5-2	28907	immunoglobulin kappa variable 5-2	B2|IGKV52	2	BCRSignalingPathway
IGKV6-21	28906	immunoglobulin kappa variable 6-21 (non-functional)	A26|IGKV621	2	BCRSignalingPathway
IGKV6D-21	28870	immunoglobulin kappa variable 6D-21 (non-functional)	A10|IGKV6D21	2	BCRSignalingPathway
IGKV6D-41	28869	immunoglobulin kappa variable 6D-41 (non-functional)	A14	2	BCRSignalingPathway
IGL@	3535	immunoglobulin lambda locus	IGL|MGC88804	22	BCRSignalingPathway
IGLC@	3536	immunoglobulin lambda constant group	IGLC	22	BCRSignalingPathway
IGLC1	3537	immunoglobulin lambda constant 1 (Mcg marker)	IGLC	22	BCRSignalingPathway
IGLC2	3538	immunoglobulin lambda constant 2 (Kern-Oz- marker)	IGLC|MGC20392|MGC45681	22	BCRSignalingPathway
IGLC3	3539	immunoglobulin lambda constant 3 (Kern-Oz+ marker)	IGLC	22	BCRSignalingPathway
IGLC6	3542	immunoglobulin lambda constant 6 (Kern+Oz- marker, gene/pseudogene)	IGLC	22	BCRSignalingPathway
IGLC7	28834	immunoglobulin lambda constant 7	C7	22	BCRSignalingPathway
IGLJ@	8217	immunoglobulin lambda joining group	IGLJ	22	BCRSignalingPathway
IGLJ1	28833	immunoglobulin lambda joining 1	J1	22	BCRSignalingPathway
IGLJ2	28832	immunoglobulin lambda joining 2	J2	22	BCRSignalingPathway
IGLJ3	28831	immunoglobulin lambda joining 3	J3	22	BCRSignalingPathway
IGLJ4	28830	immunoglobulin lambda joining 4 (non-functional)	-	22	BCRSignalingPathway
IGLJ5	28829	immunoglobulin lambda joining 5 (non-functional)	-	22	BCRSignalingPathway
IGLJ6	28828	immunoglobulin lambda joining 6	-	22	BCRSignalingPathway
IGLJ7	28827	immunoglobulin lambda joining 7	J7	22	BCRSignalingPathway
IGLV@	3546	immunoglobulin lambda variable group	IGLV	22	BCRSignalingPathway
IGLV1-36	28826	immunoglobulin lambda variable 1-36	IGLV136|V1-11	22	BCRSignalingPathway
IGLV1-40	28825	immunoglobulin lambda variable 1-40	IGLV140|V1-13	22	BCRSignalingPathway
IGLV1-44	28823	immunoglobulin lambda variable 1-44	IGLV144|V1-16	22	BCRSignalingPathway
IGLV1-47	28822	immunoglobulin lambda variable 1-47	IGLV147|V1-17	22	BCRSignalingPathway
IGLV1-50	28821	immunoglobulin lambda variable 1-50 (non-functional)	IGLV150|V1-18	22	BCRSignalingPathway
IGLV1-51	28820	immunoglobulin lambda variable 1-51	IGLV151|V1-19	22	BCRSignalingPathway
IGLV10-54	28772	immunoglobulin lambda variable 10-54	IGLV1054|V1-20	22	BCRSignalingPathway
IGLV11-55	28770	immunoglobulin lambda variable 11-55 (non-functional)	IGLV1155|V4-6	22	BCRSignalingPathway
IGLV2-11	28816	immunoglobulin lambda variable 2-11	IGLV211|V1-3	22	BCRSignalingPathway
IGLV2-14	28815	immunoglobulin lambda variable 2-14	IGLV214|V1-4	22	BCRSignalingPathway
IGLV2-18	28814	immunoglobulin lambda variable 2-18	IGLV218|V1-5	22	BCRSignalingPathway
IGLV2-23	28813	immunoglobulin lambda variable 2-23	IGLV223|V1-7	22	BCRSignalingPathway
IGLV2-33	28811	immunoglobulin lambda variable 2-33 (non-functional)	IGLV233|V1-9	22	BCRSignalingPathway
IGLV2-8	28817	immunoglobulin lambda variable 2-8	IGLV28|V1-2	22	BCRSignalingPathway
IGLV3-1	28809	immunoglobulin lambda variable 3-1	IGLV31|V2-1	22	BCRSignalingPathway
IGLV3-10	28803	immunoglobulin lambda variable 3-10	IGLV310|V2-7	22	BCRSignalingPathway
IGLV3-12	28802	immunoglobulin lambda variable 3-12	IGLV312|V2-8	22	BCRSignalingPathway
IGLV3-16	28799	immunoglobulin lambda variable 3-16	IGLV316|V2-11	22	BCRSignalingPathway
IGLV3-19	28797	immunoglobulin lambda variable 3-19	IGLV319|V2-13|VL3L	22	BCRSignalingPathway
IGLV3-21	28796	immunoglobulin lambda variable 3-21	IGLV321|V2-14	22	BCRSignalingPathway
IGLV3-22	28795	immunoglobulin lambda variable 3-22 (gene/pseudogene)	IGLV322|V2-15	22	BCRSignalingPathway
IGLV3-25	28793	immunoglobulin lambda variable 3-25	IGLV325|MGC105005|V2-17	22	BCRSignalingPathway
IGLV3-27	28791	immunoglobulin lambda variable 3-27	IGLV327|V2-19	22	BCRSignalingPathway
IGLV3-32	28787	immunoglobulin lambda variable 3-32 (non-functional)	IGLV332|V2-23P	22	BCRSignalingPathway
IGLV3-9	28804	immunoglobulin lambda variable 3-9 (gene/pseudogene)	IGLV39|V2-6	22	BCRSignalingPathway
IGLV4-3	28786	immunoglobulin lambda variable 4-3	IGLV43|V5-1	22	BCRSignalingPathway
IGLV4-60	28785	immunoglobulin lambda variable 4-60	IGLV460|V5-4	22	BCRSignalingPathway
IGLV4-69	28784	immunoglobulin lambda variable 4-69	IGLV469|V5-6	22	BCRSignalingPathway
IGLV5-37	28783	immunoglobulin lambda variable 5-37	IGLV537|V4-1	22	BCRSignalingPathway
IGLV5-39	28782	immunoglobulin lambda variable 5-39	IGLV539	22	BCRSignalingPathway
IGLV5-45	28781	immunoglobulin lambda variable 5-45	IGLV545|V4-2	22	BCRSignalingPathway
IGLV5-48	28780	immunoglobulin lambda variable 5-48 (non-functional)	IGLV548|V4-3	22	BCRSignalingPathway
IGLV5-52	28779	immunoglobulin lambda variable 5-52	IGLV552|V4-4	22	BCRSignalingPathway
IGLV6-57	28778	immunoglobulin lambda variable 6-57	IGLV657|MGC34845|V1-22	22	BCRSignalingPathway
IGLV7-43	28776	immunoglobulin lambda variable 7-43	IGLV743|V3-2	22	BCRSignalingPathway
IGLV7-46	28775	immunoglobulin lambda variable 7-46 (gene/pseudogene)	IGLV746|V3-3	22	BCRSignalingPathway
IGLV8-61	28774	immunoglobulin lambda variable 8-61	IGLV861|V3-4	22	BCRSignalingPathway
IGLV9-49	28773	immunoglobulin lambda variable 9-49	IGLV949|V5-2	22	BCRSignalingPathway
C3	718	complement component 3	ARMD9|ASP|CPAMD1	19	Chemokines
C5	727	complement component 5	CPAMD4|FLJ17816|FLJ17822|MGC142298	9	Chemokines
CAMP	820	cathelicidin antimicrobial peptide	CAP18|CRAMP|FALL-39|FALL39|HSD26|LL37	3	Chemokines
CCL1	6346	chemokine (C-C motif) ligand 1	I-309|P500|SCYA1|SISe|TCA3	17	Chemokines
CCL11	6356	chemokine (C-C motif) ligand 11	MGC22554|SCYA11	17	Chemokines
CCL13	6357	chemokine (C-C motif) ligand 13	CKb10|MCP-4|MGC17134|NCC-1|NCC1|SCYA13|SCYL1	17	Chemokines
CCL14	6358	chemokine (C-C motif) ligand 14	CC-1|CC-3|CKb1|FLJ16015|HCC-1|HCC-3|MCIF|NCC-2|NCC2|SCYA14|SCYL2|SY14	17	Chemokines
CCL14-CCL15	348249	chemokine ligand 14, chemokine ligand 15 transcription unit	-	17	Chemokines
CCL15	6359	chemokine (C-C motif) ligand 15	HCC-2|HMRP-2B|LKN1|Lkn-1|MIP-1d|MIP-5|NCC-3|NCC3|SCYA15|SCYL3|SY15	17	Chemokines
CCL16	6360	chemokine (C-C motif) ligand 16	CKb12|HCC-4|ILINCK|LCC-1|LEC|LMC|MGC117051|Mtn-1|NCC-4|NCC4|SCYA16|SCYL4	17	Chemokines
CCL17	6361	chemokine (C-C motif) ligand 17	A-152E5.3|ABCD-2|MGC138271|MGC138273|SCYA17|TARC	16	Chemokines
CCL18	6362	chemokine (C-C motif) ligand 18 (pulmonary and activation-regulated)	AMAC-1|AMAC1|CKb7|DC-CK1|DCCK1|MIP-4|PARC|SCYA18	17	Chemokines
CCL19	6363	chemokine (C-C motif) ligand 19	CKb11|ELC|MGC34433|MIP-3b|MIP3B|SCYA19	9	Chemokines
CCL2	6347	chemokine (C-C motif) ligand 2	GDCF-2|HC11|HSMCR30|MCAF|MCP-1|MCP1|MGC9434|SCYA2|SMC-CF	17	Chemokines
CCL20	6364	chemokine (C-C motif) ligand 20	CKb4|LARC|MIP-3a|MIP3A|SCYA20|ST38	2	Chemokines
CCL21	6366	chemokine (C-C motif) ligand 21	6Ckine|CKb9|ECL|MGC34555|SCYA21|SLC|TCA4	9	Chemokines
CCL22	6367	chemokine (C-C motif) ligand 22	A-152E5.1|ABCD-1|DC/B-CK|MDC|MGC34554|SCYA22|STCP-1	16	Chemokines
CCL23	6368	chemokine (C-C motif) ligand 23	CK-BETA-8|CKb8|Ckb-8|Ckb-8-1|MIP-3|MIP3|MPIF-1|SCYA23	17	Chemokines
CCL24	6369	chemokine (C-C motif) ligand 24	Ckb-6|MPIF-2|MPIF2|SCYA24	7	Chemokines
CCL25	6370	chemokine (C-C motif) ligand 25	Ckb15|MGC150327|SCYA25|TECK	19	Chemokines
CCL26	10344	chemokine (C-C motif) ligand 26	IMAC|MGC126714|MIP-4a|MIP-4alpha|SCYA26|TSC-1	7	Chemokines
CCL27	10850	chemokine (C-C motif) ligand 27	ALP|CTACK|CTAK|ESKINE|ILC|PESKY|SCYA27	9	Chemokines
CCL28	56477	chemokine (C-C motif) ligand 28	CCK1|MEC|MGC71902|SCYA28	5	Chemokines
CCL3	6348	chemokine (C-C motif) ligand 3	G0S19-1|LD78ALPHA|MIP-1-alpha|MIP1A|SCYA3	17	Chemokines
CCL3L1	6349	chemokine (C-C motif) ligand 3-like 1	464.2|D17S1718|G0S19-2|LD78|LD78BETA|MGC104178|MGC12815|MGC182017|MIP1AP|SCYA3L|SCYA3L1	17	Chemokines
CCL3L2	390788	chemokine (C-C motif) ligand 3-like 2	G0S19-3|LD78gamma|SCYA3L2	17	Chemokines
CCL3L3	414062	chemokine (C-C motif) ligand 3-like 3	464.2|D17S1718|LD78|LD78BETA|MGC12815|SCYA3L|SCYA3L1	17	Chemokines
CCL4	6351	chemokine (C-C motif) ligand 4	ACT2|AT744.1|G-26|LAG1|MGC104418|MGC126025|MGC126026|MIP-1-beta|MIP1B|MIP1B1|SCYA2|SCYA4	17	Chemokines
CCL4L1	9560	chemokine (C-C motif) ligand 4-like 1	AT744.2|CCL4L|LAG-1|LAG1|SCYA4L	17	Chemokines
CCL4L2	388372	chemokine (C-C motif) ligand 4-like 2	AT744.2|CCL4L|SCYA4L	17	Chemokines
CCL5	6352	chemokine (C-C motif) ligand 5	D17S136E|MGC17164|RANTES|SCYA5|SISd|TCP228	17	Chemokines
CCL7	6354	chemokine (C-C motif) ligand 7	FIC|MARC|MCP-3|MCP3|MGC138463|MGC138465|NC28|SCYA6|SCYA7	17	Chemokines
CCL8	6355	chemokine (C-C motif) ligand 8	HC14|MCP-2|MCP2|SCYA10|SCYA8	17	Chemokines
CKLF	51192	chemokine-like factor	C32|CKLF1|CKLF2|CKLF3|CKLF4|HSPC224|UCK-1	16	Chemokines
CMA1	1215	chymase 1, mast cell	CYH|MCT1|MGC119890|MGC119891|chymase	14	Chemokines
CTSG	1511	cathepsin G	CG|MGC23078	14	Chemokines
CX3CL1	6376	chemokine (C-X3-C motif) ligand 1	ABCD-3|C3Xkine|CXC3|CXC3C|NTN|NTT|SCYD1|fractalkine|neurotactin	16	Chemokines
CXCL1	2919	chemokine (C-X-C motif) ligand 1 (melanoma growth stimulating activity, alpha)	FSP|GRO1|GROa|MGSA|MGSA-a|NAP-3|SCYB1	4	Chemokines
CXCL10	3627	chemokine (C-X-C motif) ligand 10	C7|IFI10|INP10|IP-10|SCYB10|crg-2|gIP-10|mob-1	4	Chemokines
CXCL11	6373	chemokine (C-X-C motif) ligand 11	H174|I-TAC|IP-9|IP9|MGC102770|SCYB11|SCYB9B|b-R1	4	Chemokines
CXCL12	6387	chemokine (C-X-C motif) ligand 12 (stromal cell-derived factor 1)	PBSF|SCYB12|SDF-1a|SDF-1b|SDF1|SDF1A|SDF1B|TLSF-a|TLSF-b|TPAR1	10	Chemokines
CXCL13	10563	chemokine (C-X-C motif) ligand 13	ANGIE|ANGIE2|BCA-1|BCA1|BLC|BLR1L|SCYB13	4	Chemokines
CXCL14	9547	chemokine (C-X-C motif) ligand 14	BMAC|BRAK|KS1|Kec|MGC10687|MIP-2g|NJAC|SCYB14|bolekine	5	Chemokines
CXCL16	58191	chemokine (C-X-C motif) ligand 16	CXCLG16|SR-PSOX|SRPSOX	17	Chemokines
CXCL17	284340	chemokine (C-X-C motif) ligand 17	DMC|Dcip1|MGC138300|UNQ473|VCC-1|VCC1	19	Chemokines
CXCL2	2920	chemokine (C-X-C motif) ligand 2	CINC-2a|GRO2|GROb|MGSA-b|MIP-2a|MIP2|MIP2A|SCYB2	4	Chemokines
CXCL3	2921	chemokine (C-X-C motif) ligand 3	CINC-2b|GRO3|GROg|MIP-2b|MIP2B|SCYB3	4	Chemokines
CXCL5	6374	chemokine (C-X-C motif) ligand 5	ENA-78|SCYB5	4	Chemokines
CXCL6	6372	chemokine (C-X-C motif) ligand 6 (granulocyte chemotactic protein 2)	CKA-3|GCP-2|GCP2|SCYB6	4	Chemokines
CXCL9	4283	chemokine (C-X-C motif) ligand 9	CMK|Humig|MIG|SCYB9|crg-10	4	Chemokines
CYR61	3491	cysteine-rich, angiogenic inducer, 61	CCN1|GIG1|IGFBP10	1	Chemokines
DEFA1	1667	defensin, alpha 1	DEF1|DEFA2|HNP-1|HP-1|MGC138393|MRS	8	Chemokines
DEFA3	1668	defensin, alpha 3, neutrophil-specific	DEF3|HNP-3|HNP3|HP-3	8	Chemokines
DEFA5	1670	defensin, alpha 5, Paneth cell-specific	DEF5|HD-5|MGC129728	8	Chemokines
DEFB1	1672	defensin, beta 1	BD1|DEFB-1|DEFB101|HBD1|MGC51822	8	Chemokines
DEFB103A	55894	defensin, beta 103A	DEFB103|DEFB3|HBD-3|HBD3|HBP-3|HBP3	8	Chemokines
DEFB104A	140596	defensin, beta 104A	BD-4|DEFB-4|DEFB104|DEFB4|MGC118942|MGC118944|MGC118945|hBD-4	8	Chemokines
DEFB4	1673	defensin, beta 4	DEFB-2|DEFB102|DEFB2|HBD-2|SAP1	8	Chemokines
EDN1	1906	endothelin 1	ET1|HDLCQ7	6	Chemokines
EDN2	1907	endothelin 2	ET2|PPET2	1	Chemokines
EDN3	1908	endothelin 3	ET3|MGC15067|MGC61498	20	Chemokines
FGF10	2255	fibroblast growth factor 10	-	5	Chemokines
FGF2	2247	fibroblast growth factor 2 (basic)	BFGF|FGFB|HBGF-2	4	Chemokines
HTN3	3347	histatin 3	HIS2|HTN2|HTN5	4	Chemokines
IL8	3576	interleukin 8	CXCL8|GCP-1|GCP1|LECT|LUCT|LYNAP|MDNCF|MONAP|NAF|NAP-1|NAP1	4	Chemokines
LECT2	3950	leukocyte cell-derived chemotaxin 2	MGC126628|chm-II|chm2	5	Chemokines
PF4	5196	platelet factor 4	CXCL4|MGC138298|SCYB4	4	Chemokines
PF4V1	5197	platelet factor 4 variant 1	CXCL4L1|CXCL4V1|PF4-ALT|PF4A|SCYB4V1	4	Chemokines
PLAU	5328	plasminogen activator, urokinase	ATF|UPA|URK|u-PA	10	Chemokines
PPBP	5473	pro-platelet basic protein (chemokine (C-X-C motif) ligand 7)	B-TG1|Beta-TG|CTAP-III|CTAP3|CTAPIII|CXCL7|LA-PF4|LDGF|MDGF|NAP-2|PBP|SCYB7|TC1|TC2|TGB|TGB1|THBGB|THBGB1	4	Chemokines
PPBPL1	728045	pro-platelet basic protein-like 1	TGB2	4	Chemokines
PROK2	60675	prokineticin 2	BV8|KAL4|MIT1|PK2	3	Chemokines
RNASE2	6036	ribonuclease, RNase A family, 2 (liver, eosinophil-derived neurotoxin)	EDN|RNS2	14	Chemokines
SAA1	6288	serum amyloid A1	MGC111216|PIG4|SAA|TP53I4	11	Chemokines
SAA2	6289	serum amyloid A2	-	11	Chemokines
SBDS	51119	Shwachman-Bodian-Diamond syndrome	CGI-97|FLJ10917|SDS|SWDS	7	Chemokines
SEMA3A	10371	sema domain, immunoglobulin domain (Ig), short basic domain, secreted, (semaphorin) 3A	Hsema-I|Hsema-III|MGC133243|SEMA1|SEMAD|SEMAIII|SEMAL|SemD|coll-1	7	Chemokines
SEMA3B	7869	sema domain, immunoglobulin domain (Ig), short basic domain, secreted, (semaphorin) 3B	FLJ34863|LUCA-1|SEMA5|SEMAA|SemA|semaV	3	Chemokines
SEMA3C	10512	sema domain, immunoglobulin domain (Ig), short basic domain, secreted, (semaphorin) 3C	SEMAE|SemE	7	Chemokines
SEMA3D	223117	sema domain, immunoglobulin domain (Ig), short basic domain, secreted, (semaphorin) 3D	MGC39708|Sema-Z2|coll-2	7	Chemokines
SEMA3E	9723	sema domain, immunoglobulin domain (Ig), short basic domain, secreted, (semaphorin) 3E	KIAA0331|M-SEMAH|M-SemaK|SEMAH|coll-5	7	Chemokines
SEMA3F	6405	sema domain, immunoglobulin domain (Ig), short basic domain, secreted, (semaphorin) 3F	SEMA-IV|SEMA4|SEMAK	3	Chemokines
SEMA3G	56920	sema domain, immunoglobulin domain (Ig), short basic domain, secreted, (semaphorin) 3G	FLJ00014|MGC119473|sem2	3	Chemokines
SEMA4A	64218	sema domain, immunoglobulin domain (Ig), transmembrane domain (TM) and short cytoplasmic domain, (semaphorin) 4A	CORD10|FLJ12287|RP35|SEMAB|SEMB	1	Chemokines
SEMA4B	10509	sema domain, immunoglobulin domain (Ig), transmembrane domain (TM) and short cytoplasmic domain, (semaphorin) 4B	KIAA1745|MGC131831|SEMAC|SemC	15	Chemokines
SEMA4C	54910	sema domain, immunoglobulin domain (Ig), transmembrane domain (TM) and short cytoplasmic domain, (semaphorin) 4C	FLJ20369|KIAA1739|M-SEMA-F|MGC126382|MGC126383|SEMACL1|SEMAF|SEMAI	2	Chemokines
SEMA4D	10507	sema domain, immunoglobulin domain (Ig), transmembrane domain (TM) and short cytoplasmic domain, (semaphorin) 4D	C9orf164|CD100|FLJ33485|FLJ34282|FLJ39737|FLJ46484|M-sema-G|MGC169138|MGC169141|SEMAJ|coll-4	9	Chemokines
SEMA4F	10505	sema domain, immunoglobulin domain (Ig), transmembrane domain (TM) and short cytoplasmic domain, (semaphorin) 4F	M-SEMA|PRO2353|SEMAM|SEMAW|m-Sema-M	2	Chemokines
SEMA4G	57715	sema domain, immunoglobulin domain (Ig), transmembrane domain (TM) and short cytoplasmic domain, (semaphorin) 4G	FLJ20590|KIAA1619|MGC102867	10	Chemokines
SEMA5A	9037	sema domain, seven thrombospondin repeats (type 1 and type 1-like), transmembrane domain (TM) and short cytoplasmic domain, (semaphorin) 5A	FLJ12815|SEMAF|semF	5	Chemokines
SEMA5B	54437	sema domain, seven thrombospondin repeats (type 1 and type 1-like), transmembrane domain (TM) and short cytoplasmic domain, (semaphorin) 5B	FLJ10372|KIAA1445|SEMAG|SemG	3	Chemokines
SEMA6A	57556	sema domain, transmembrane domain (TM), and cytoplasmic domain, (semaphorin) 6A	HT018|KIAA1368|SEMA|SEMA6A1|SEMAQ|VIA	5	Chemokines
SEMA6B	10501	sema domain, transmembrane domain (TM), and cytoplasmic domain, (semaphorin) 6B	SEM-SEMA-Y|SEMA-VIB|SEMAN|semaZ	19	Chemokines
SEMA6C	10500	sema domain, transmembrane domain (TM), and cytoplasmic domain, (semaphorin) 6C	SEMAY|m-SemaY|m-SemaY2	1	Chemokines
SEMA6D	80031	sema domain, transmembrane domain (TM), and cytoplasmic domain, (semaphorin) 6D	FLJ11598|KIAA1479	15	Chemokines
SEMA7A	8482	semaphorin 7A, GPI membrane anchor (John Milton Hagen blood group)	CD108|CDw108|H-SEMA-K1|H-Sema-L|JMH|MGC126692|MGC126696|SEMAK1|SEMAL	15	Chemokines
SLIT1	6585	slit homolog 1 (Drosophila)	MEGF4|MGC164811|SLIL1|SLIT3|Slit-1	10	Chemokines
SLIT2	9353	slit homolog 2 (Drosophila)	FLJ14420|SLIL3|Slit-2	4	Chemokines
TNC	3371	tenascin C	HXB|MGC167029|TN	9	Chemokines
TYMP	1890	thymidine phosphorylase	ECGF1|MNGIE|PDECGF|TP|hPD-ECGF	22	Chemokines
XCL1	6375	chemokine (C motif) ligand 1	ATAC|LPTN|LTN|SCM-1|SCM-1a|SCM1|SCYC1	1	Chemokines
XCL2	6846	chemokine (C motif) ligand 2	SCM-1b|SCM1B|SCYC2	1	Chemokines
C5AR1	728	complement component 5a receptor 1	C5A|C5AR|C5R1|CD88	19	Chemokine_Receptors
CCBP2	1238	chemokine binding protein 2	CCR10|CCR9|CMKBR9|D6|MGC126678|MGC138250|hD6	3	Chemokine_Receptors
CCR1	1230	chemokine (C-C motif) receptor 1	CD191|CKR-1|CKR1|CMKBR1|HM145|MIP1aR|SCYAR1	3	Chemokine_Receptors
CCR10	2826	chemokine (C-C motif) receptor 10	GPR2	17	Chemokine_Receptors
CCR3	1232	chemokine (C-C motif) receptor 3	CC-CKR-3|CD193|CKR3|CMKBR3|MGC102841	3	Chemokine_Receptors
CCR4	1233	chemokine (C-C motif) receptor 4	CC-CKR-4|CD194|CKR4|CMKBR4|ChemR13|HGCN:14099|K5-5|MGC88293	3	Chemokine_Receptors
CCR5	1234	chemokine (C-C motif) receptor 5	CC-CKR-5|CCCKR5|CD195|CKR-5|CKR5|CMKBR5|FLJ78003|IDDM22	3	Chemokine_Receptors
CCR6	1235	chemokine (C-C motif) receptor 6	BN-1|CD196|CKR-L3|CKR6|CKRL3|CMKBR6|DCR2|DRY-6|GPR-CY4|GPR29|GPRCY4|STRL22	6	Chemokine_Receptors
CCR7	1236	chemokine (C-C motif) receptor 7	BLR2|CD197|CDw197|CMKBR7|EBI1	17	Chemokine_Receptors
CCR8	1237	chemokine (C-C motif) receptor 8	CDw198|CKR-L1|CKRL1|CMKBR8|CMKBRL2|CY6|GPR-CY6|MGC129966|MGC129973|TER1	3	Chemokine_Receptors
CCR9	10803	chemokine (C-C motif) receptor 9	CDw199|GPR-9-6|GPR28	3	Chemokine_Receptors
CCRL1	51554	chemokine (C-C motif) receptor-like 1	CC-CKR-11|CCBP2|CCR10|CCR11|CCX-CKR|CKR-11|PPR1|VSHK1	3	Chemokine_Receptors
CCRL2	9034	chemokine (C-C motif) receptor-like 2	CKRX|CRAM-A|CRAM-B|FLJ55815|HCR|MGC116710|MGC34104	3	Chemokine_Receptors
CMKLR1	1240	chemokine-like receptor 1	CHEMERINR|ChemR23|DEZ|MGC126105|MGC126106	12	Chemokine_Receptors
CX3CR1	1524	chemokine (C-X3-C motif) receptor 1	CCRL1|CMKBRL1|CMKDR1|GPR13|GPRV28|V28	3	Chemokine_Receptors
CXCR3	2833	chemokine (C-X-C motif) receptor 3	CD182|CD183|CKR-L2|CMKAR3|GPR9|IP10-R|Mig-R|MigR	X	Chemokine_Receptors
CXCR4	7852	chemokine (C-X-C motif) receptor 4	CD184|D2S201E|FB22|HM89|HSY3RR|LAP3|LCR1|LESTR|NPY3R|NPYR|NPYRL|NPYY3R|WHIM	2	Chemokine_Receptors
CXCR5	643	chemokine (C-X-C motif) receptor 5	BLR1|CD185|MDR15|MGC117347	11	Chemokine_Receptors
CXCR6	10663	chemokine (C-X-C motif) receptor 6	BONZO|CD186|STRL33|TYMSTR	3	Chemokine_Receptors
CXCR7	57007	chemokine (C-X-C motif) receptor 7	CMKOR1|GPR159|RDC1	2	Chemokine_Receptors
CYSLTR1	10800	cysteinyl leukotriene receptor 1	CYSLT1|CYSLT1R|CYSLTR|HG55|HMTMF81|MGC46139	X	Chemokine_Receptors
CYSLTR2	57105	cysteinyl leukotriene receptor 2	CYSLT2|CYSLT2R|GPCR|HG57|HPN321|KPG_011|PSEC0146|hGPCR21	13	Chemokine_Receptors
DARC	2532	Duffy blood group, chemokine receptor	CCBP1|CD234|Dfy|FY|GPD|GpFy|WBCQ1	1	Chemokine_Receptors
EDNRA	1909	endothelin receptor type A	ETA|ETRA	4	Chemokine_Receptors
EDNRB	1910	endothelin receptor type B	ABCDS|ETB|ETBR|ETRB|HSCR|HSCR2	13	Chemokine_Receptors
FPR1	2357	formyl peptide receptor 1	FMLP|FPR	19	Chemokine_Receptors
FPR2	2358	formyl peptide receptor 2	ALXR|FMLP-R-II|FMLPX|FPR2A|FPRH1|FPRH2|FPRL1|HM63|LXA4R	19	Chemokine_Receptors
FPR2	2358	formyl peptide receptor 2	ALXR|FMLP-R-II|FMLPX|FPR2A|FPRH1|FPRH2|FPRL1|HM63|LXA4R	19	Chemokine_Receptors
GPR17	2840	G protein-coupled receptor 17	DKFZp686M18273	2	Chemokine_Receptors
GPR32	2854	G protein-coupled receptor 32	-	19	Chemokine_Receptors
GPR33	2856	G protein-coupled receptor 33 (gene/pseudogene)	-	14	Chemokine_Receptors
GPR44	11251	G protein-coupled receptor 44	CD294|CRTH2|DP2	11	Chemokine_Receptors
GPR77	27202	G protein-coupled receptor 77	C5L2|GPF77	19	Chemokine_Receptors
IL8RA	3577	interleukin 8 receptor, alpha	C-C|C-C-CKR-1|CD128|CD181|CDw128a|CKR-1|CMKAR1|CXCR1|IL8R1|IL8RBA	2	Chemokine_Receptors
IL8RB	3579	interleukin 8 receptor, beta	CD182|CDw128b|CMKAR2|CXCR2|IL8R2|IL8RA	2	Chemokine_Receptors
LTB4R	1241	leukotriene B4 receptor	BLT1|BLTR|CMKRL1|GPR16|LTB4R1|LTBR1|P2RY7|P2Y7	14	Chemokine_Receptors
LTB4R2	56413	leukotriene B4 receptor 2	BLT2|BLTR2|JULF2|KPG_004|NOP9	14	Chemokine_Receptors
PLAUR	5329	plasminogen activator, urokinase receptor	CD87|UPAR|URKR	19	Chemokine_Receptors
PLXNA1	5361	plexin A1	NOV|NOVP|PLEXIN-A1|PLXN1	3	Chemokine_Receptors
PLXNA2	5362	plexin A2	FLJ11751|FLJ30634|KIAA0463|OCT|PLXN2	1	Chemokine_Receptors
PLXNA3	55558	plexin A3	6.3|HSSEXGENE|PLEXIN-A3|PLXN3|PLXN4|SEX|XAP-6	X	Chemokine_Receptors
PLXNA4	91584	plexin A4	DKFZp434G0625|DKFZp566O0546|FAYV2820|FLJ35026|FLJ38287|KIAA1550|PLEXA4|PLXNA4A|PLXNA4B|PRO34003	7	Chemokine_Receptors
PLXNB1	5364	plexin B1	KIAA0407|MGC149167|PLEXIN-B1|PLXN5|SEP	3	Chemokine_Receptors
PLXNB2	23654	plexin B2	KIAA0315|MM1|Nbla00445|PLEXB2|dJ402G11.3	22	Chemokine_Receptors
PLXNB3	5365	plexin B3	FLJ76953|PLEXB3|PLEXR|PLXN6	X	Chemokine_Receptors
PLXNC1	10154	plexin C1	CD232|PLXN-C1|VESPR	12	Chemokine_Receptors
PLXND1	23129	plexin D1	KIAA0620|MGC75353|PLEXD1	3	Chemokine_Receptors
PTAFR	5724	platelet-activating factor receptor	PAFR	1	Chemokine_Receptors
ROBO1	6091	roundabout, axon guidance receptor, homolog 1 (Drosophila)	DUTT1|FLJ21882|MGC131599|MGC133277|SAX3	3	Chemokine_Receptors
ROBO2	6092	roundabout, axon guidance receptor, homolog 2 (Drosophila)	KIAA1568|SAX3	3	Chemokine_Receptors
ROBO3	64221	roundabout, axon guidance receptor, homolog 3 (Drosophila)	FLJ21044|HGPPS|HGPS|RBIG1|RIG1	11	Chemokine_Receptors
RXFP3	51289	relaxin/insulin-like family peptide receptor 3	GPCR135|MGC141998|MGC142000|RLN3R1|RXFPR3|SALPR	5	Chemokine_Receptors
XCR1	2829	chemokine (C motif) receptor 1	CCXCR1|GPR5	3	Chemokine_Receptors
ADIPOQ	9370	adiponectin, C1Q and collagen domain containing	ACDC|ACRP30|ADIPQTL1|ADPN|APM-1|APM1|GBP28|adiponectin	3	Cytokines
ADM	133	adrenomedullin	AM	11	Cytokines
ADM2	79924	adrenomedullin 2	AM2|FLJ21135|dJ579N16.4	22	Cytokines
AGRP	181	agouti related protein homolog (mouse)	AGRT|ART|ASIP2|MGC118963	16	Cytokines
AGT	183	angiotensinogen (serpin peptidase inhibitor, clade A, member 8)	ANHU|FLJ92595|FLJ97926|SERPINA8	1	Cytokines
AMBN	258	ameloblastin (enamel matrix protein)	-	4	Cytokines
AMELX	265	amelogenin (amelogenesis imperfecta 1, X-linked)	AIH1|ALGN|AMG|AMGL|AMGX	X	Cytokines
AMH	268	anti-Mullerian hormone	MIF|MIS	19	Cytokines
ANGPTL5	253935	angiopoietin-like 5	-	11	Cytokines
ANGPTL7	10218	angiopoietin-like 7	AngX|CDT6|RP4-647M16.2|dJ647M16.1	1	Cytokines
APLN	8862	apelin	XNPEP2	X	Cytokines
AREG	374	amphiregulin	AR|CRDGF|MGC13647|SDGF	4	Cytokines
ARMET	7873	arginine-rich, mutated in early stage tumors	ARP|MANF|MGC142148|MGC142150	3	Cytokines
ARMETL1	441549	arginine-rich, mutated in early stage tumors-like 1	cdnf	10	Cytokines
ARTN	9048	artemin	ENOVIN|EVN|NBN	1	Cytokines
AVP	551	arginine vasopressin	ADH|ARVP|AVP-NPII|AVRP|VP	20	Cytokines
AZU1	566	azurocidin 1	AZAMP|AZU|CAP37|HBP|HUMAZUR|NAZC	19	Cytokines
BDNF	627	brain-derived neurotrophic factor	MGC34632	11	Cytokines
BMP1	649	bone morphogenetic protein 1	FLJ44432|PCOLC|PCP|TLD|pCP-2	8	Cytokines
BMP10	27302	bone morphogenetic protein 10	MGC126783	2	Cytokines
BMP15	9210	bone morphogenetic protein 15	GDF9B|ODG2|POF4	X	Cytokines
BMP2	650	bone morphogenetic protein 2	BMP2A	20	Cytokines
BMP3	651	bone morphogenetic protein 3	BMP-3A	4	Cytokines
BMP4	652	bone morphogenetic protein 4	BMP2B|BMP2B1|MCOPS6|OFC11|ZYME	14	Cytokines
BMP5	653	bone morphogenetic protein 5	MGC34244	6	Cytokines
BMP6	654	bone morphogenetic protein 6	VGR|VGR1	6	Cytokines
BMP7	655	bone morphogenetic protein 7	OP-1	20	Cytokines
BMP8A	353500	bone morphogenetic protein 8a	FLJ14351|FLJ45264	1	Cytokines
BMP8B	656	bone morphogenetic protein 8b	BMP8|MGC131757|OP2	1	Cytokines
BTC	685	betacellulin	-	4	Cytokines
C19orf10	56005	chromosome 19 open reading frame 10	EUROIMAGE1875335|IL25|IL27|IL27w|R33729_1|SF20	19	Cytokines
C3	718	complement component 3	ARMD9|ASP|CPAMD1	19	Cytokines
C5	727	complement component 5	CPAMD4|FLJ17816|FLJ17822|MGC142298	9	Cytokines
CALCA	796	calcitonin-related polypeptide alpha	CALC1|CGRP|CGRP-I|CGRP1|CT|KC|MGC126648	11	Cytokines
CALCB	797	calcitonin-related polypeptide beta	CALC2|CGRP-II|CGRP2|FLJ30166	11	Cytokines
CAMP	820	cathelicidin antimicrobial peptide	CAP18|CRAMP|FALL-39|FALL39|HSD26|LL37	3	Cytokines
CAT	847	catalase	MGC138422|MGC138424	11	Cytokines
CCK	885	cholecystokinin	MGC117187	3	Cytokines
CCL1	6346	chemokine (C-C motif) ligand 1	I-309|P500|SCYA1|SISe|TCA3	17	Cytokines
CCL11	6356	chemokine (C-C motif) ligand 11	MGC22554|SCYA11	17	Cytokines
CCL13	6357	chemokine (C-C motif) ligand 13	CKb10|MCP-4|MGC17134|NCC-1|NCC1|SCYA13|SCYL1	17	Cytokines
CCL14	6358	chemokine (C-C motif) ligand 14	CC-1|CC-3|CKb1|FLJ16015|HCC-1|HCC-3|MCIF|NCC-2|NCC2|SCYA14|SCYL2|SY14	17	Cytokines
CCL14-CCL15	348249	chemokine ligand 14, chemokine ligand 15 transcription unit	-	17	Cytokines
CCL15	6359	chemokine (C-C motif) ligand 15	HCC-2|HMRP-2B|LKN1|Lkn-1|MIP-1d|MIP-5|NCC-3|NCC3|SCYA15|SCYL3|SY15	17	Cytokines
CCL16	6360	chemokine (C-C motif) ligand 16	CKb12|HCC-4|ILINCK|LCC-1|LEC|LMC|MGC117051|Mtn-1|NCC-4|NCC4|SCYA16|SCYL4	17	Cytokines
CCL17	6361	chemokine (C-C motif) ligand 17	A-152E5.3|ABCD-2|MGC138271|MGC138273|SCYA17|TARC	16	Cytokines
CCL18	6362	chemokine (C-C motif) ligand 18 (pulmonary and activation-regulated)	AMAC-1|AMAC1|CKb7|DC-CK1|DCCK1|MIP-4|PARC|SCYA18	17	Cytokines
CCL19	6363	chemokine (C-C motif) ligand 19	CKb11|ELC|MGC34433|MIP-3b|MIP3B|SCYA19	9	Cytokines
CCL2	6347	chemokine (C-C motif) ligand 2	GDCF-2|HC11|HSMCR30|MCAF|MCP-1|MCP1|MGC9434|SCYA2|SMC-CF	17	Cytokines
CCL20	6364	chemokine (C-C motif) ligand 20	CKb4|LARC|MIP-3a|MIP3A|SCYA20|ST38	2	Cytokines
CCL21	6366	chemokine (C-C motif) ligand 21	6Ckine|CKb9|ECL|MGC34555|SCYA21|SLC|TCA4	9	Cytokines
CCL22	6367	chemokine (C-C motif) ligand 22	A-152E5.1|ABCD-1|DC/B-CK|MDC|MGC34554|SCYA22|STCP-1	16	Cytokines
CCL23	6368	chemokine (C-C motif) ligand 23	CK-BETA-8|CKb8|Ckb-8|Ckb-8-1|MIP-3|MIP3|MPIF-1|SCYA23	17	Cytokines
CCL24	6369	chemokine (C-C motif) ligand 24	Ckb-6|MPIF-2|MPIF2|SCYA24	7	Cytokines
CCL25	6370	chemokine (C-C motif) ligand 25	Ckb15|MGC150327|SCYA25|TECK	19	Cytokines
CCL26	10344	chemokine (C-C motif) ligand 26	IMAC|MGC126714|MIP-4a|MIP-4alpha|SCYA26|TSC-1	7	Cytokines
CCL27	10850	chemokine (C-C motif) ligand 27	ALP|CTACK|CTAK|ESKINE|ILC|PESKY|SCYA27	9	Cytokines
CCL28	56477	chemokine (C-C motif) ligand 28	CCK1|MEC|MGC71902|SCYA28	5	Cytokines
CCL3	6348	chemokine (C-C motif) ligand 3	G0S19-1|LD78ALPHA|MIP-1-alpha|MIP1A|SCYA3	17	Cytokines
CCL3L1	6349	chemokine (C-C motif) ligand 3-like 1	464.2|D17S1718|G0S19-2|LD78|LD78BETA|MGC104178|MGC12815|MGC182017|MIP1AP|SCYA3L|SCYA3L1	17	Cytokines
CCL3L2	390788	chemokine (C-C motif) ligand 3-like 2	G0S19-3|LD78gamma|SCYA3L2	17	Cytokines
CCL3L3	414062	chemokine (C-C motif) ligand 3-like 3	464.2|D17S1718|LD78|LD78BETA|MGC12815|SCYA3L|SCYA3L1	17	Cytokines
CCL4	6351	chemokine (C-C motif) ligand 4	ACT2|AT744.1|G-26|LAG1|MGC104418|MGC126025|MGC126026|MIP-1-beta|MIP1B|MIP1B1|SCYA2|SCYA4	17	Cytokines
CCL4L1	9560	chemokine (C-C motif) ligand 4-like 1	AT744.2|CCL4L|LAG-1|LAG1|SCYA4L	17	Cytokines
CCL4L2	388372	chemokine (C-C motif) ligand 4-like 2	AT744.2|CCL4L|SCYA4L	17	Cytokines
CCL5	6352	chemokine (C-C motif) ligand 5	D17S136E|MGC17164|RANTES|SCYA5|SISd|TCP228	17	Cytokines
CCL7	6354	chemokine (C-C motif) ligand 7	FIC|MARC|MCP-3|MCP3|MGC138463|MGC138465|NC28|SCYA6|SCYA7	17	Cytokines
CCL8	6355	chemokine (C-C motif) ligand 8	HC14|MCP-2|MCP2|SCYA10|SCYA8	17	Cytokines
CD320	51293	CD320 molecule	8D6|8D6A	19	Cytokines
CD40LG	959	CD40 ligand	CD154|CD40L|HIGM1|IGM|IMD3|T-BAM|TNFSF5|TRAP|gp39|hCD40L	X	Cytokines
CD70	970	CD70 molecule	CD27L|CD27LG|TNFSF7	19	Cytokines
CECR1	51816	cat eye syndrome chromosome region, candidate 1	ADGF|IDGFL	22	Cytokines
CER1	9350	cerberus 1, cysteine knot superfamily, homolog (Xenopus laevis)	DAND4|MGC119894|MGC119895|MGC96951	9	Cytokines
CGA	1081	glycoprotein hormones, alpha polypeptide	CG-ALPHA|FSHA|GPHA1|GPHa|HCG|LHA|TSHA	6	Cytokines
CGB	1082	chorionic gonadotropin, beta polypeptide	CGB3|hCGB	19	Cytokines
CGB1	114335	chorionic gonadotropin, beta polypeptide 1	-	19	Cytokines
CGB2	114336	chorionic gonadotropin, beta polypeptide 2	-	19	Cytokines
CGB5	93659	chorionic gonadotropin, beta polypeptide 5	HCG|MGC119822	19	Cytokines
CGB7	94027	chorionic gonadotropin, beta polypeptide 7	CG-beta-a|FLJ35403|FLJ43118	19	Cytokines
CGB8	94115	chorionic gonadotropin, beta polypeptide 8	-	19	Cytokines
CHGA	1113	chromogranin A (parathyroid secretory protein 1)	CGA	14	Cytokines
CHGB	1114	chromogranin B (secretogranin 1)	SCG1	20	Cytokines
CKLF	51192	chemokine-like factor	C32|CKLF1|CKLF2|CKLF3|CKLF4|HSPC224|UCK-1	16	Cytokines
CLCF1	23529	cardiotrophin-like cytokine factor 1	BSF3|CISS2|CLC|NNT1|NR6	11	Cytokines
CLEC11A	6320	C-type lectin domain family 11, member A	CLECSF3|LSLCL|P47|SCGF	19	Cytokines
CMA1	1215	chymase 1, mast cell	CYH|MCT1|MGC119890|MGC119891|chymase	14	Cytokines
CMTM1	113540	CKLF-like MARVEL transmembrane domain containing 1	CKLFH|CKLFH1|CKLFSF1|MGC71870	16	Cytokines
CMTM2	146225	CKLF-like MARVEL transmembrane domain containing 2	CKLFSF2|MGC39436	16	Cytokines
CMTM3	123920	CKLF-like MARVEL transmembrane domain containing 3	BNAS2|CKLFSF3|FLJ31762|MGC51956	16	Cytokines
CMTM4	146223	CKLF-like MARVEL transmembrane domain containing 4	CKLFSF4	16	Cytokines
CMTM5	116173	CKLF-like MARVEL transmembrane domain containing 5	CKLFSF5|FLJ37521	14	Cytokines
CMTM6	54918	CKLF-like MARVEL transmembrane domain containing 6	CKLFSF6|FLJ20396|PRO2219	3	Cytokines
CMTM7	112616	CKLF-like MARVEL transmembrane domain containing 7	CKLFSF7|FLJ30992	3	Cytokines
CMTM8	152189	CKLF-like MARVEL transmembrane domain containing 8	CKLFSF8|CKLFSF8-V2	3	Cytokines
CNTF	1270	ciliary neurotrophic factor	HCNTF	11	Cytokines
CORT	1325	cortistatin	CST-14|CST-17|CST-29	1	Cytokines
CRH	1392	corticotropin releasing hormone	CRF	8	Cytokines
CSF1	1435	colony stimulating factor 1 (macrophage)	MCSF|MGC31930	1	Cytokines
CSF2	1437	colony stimulating factor 2 (granulocyte-macrophage)	GMCSF|MGC131935|MGC138897	5	Cytokines
CSF3	1440	colony stimulating factor 3 (granulocyte)	G-CSF|GCSF|MGC45931	17	Cytokines
CSH1	1442	chorionic somatomammotropin hormone 1 (placental lactogen)	CSA|CSMT|FLJ75407|PL	17	Cytokines
CSH2	1443	chorionic somatomammotropin hormone 2	CS-2|CSB|hCS-B	17	Cytokines
CSHL1	1444	chorionic somatomammotropin hormone-like 1	CS-5|CSHP1|CSL|MGC149868|hCS-L	17	Cytokines
CSPG5	10675	chondroitin sulfate proteoglycan 5 (neuroglycan C)	MGC44034|NGC	3	Cytokines
CTF1	1489	cardiotrophin 1	CT-1|CT1	16	Cytokines
CTGF	1490	connective tissue growth factor	CCN2|HCS24|IGFBP8|MGC102839|NOV2	6	Cytokines
CTSG	1511	cathepsin G	CG|MGC23078	14	Cytokines
CX3CL1	6376	chemokine (C-X3-C motif) ligand 1	ABCD-3|C3Xkine|CXC3|CXC3C|NTN|NTT|SCYD1|fractalkine|neurotactin	16	Cytokines
CXCL1	2919	chemokine (C-X-C motif) ligand 1 (melanoma growth stimulating activity, alpha)	FSP|GRO1|GROa|MGSA|MGSA-a|NAP-3|SCYB1	4	Cytokines
CXCL10	3627	chemokine (C-X-C motif) ligand 10	C7|IFI10|INP10|IP-10|SCYB10|crg-2|gIP-10|mob-1	4	Cytokines
CXCL11	6373	chemokine (C-X-C motif) ligand 11	H174|I-TAC|IP-9|IP9|MGC102770|SCYB11|SCYB9B|b-R1	4	Cytokines
CXCL12	6387	chemokine (C-X-C motif) ligand 12 (stromal cell-derived factor 1)	PBSF|SCYB12|SDF-1a|SDF-1b|SDF1|SDF1A|SDF1B|TLSF-a|TLSF-b|TPAR1	10	Cytokines
CXCL13	10563	chemokine (C-X-C motif) ligand 13	ANGIE|ANGIE2|BCA-1|BCA1|BLC|BLR1L|SCYB13	4	Cytokines
CXCL14	9547	chemokine (C-X-C motif) ligand 14	BMAC|BRAK|KS1|Kec|MGC10687|MIP-2g|NJAC|SCYB14|bolekine	5	Cytokines
CXCL16	58191	chemokine (C-X-C motif) ligand 16	CXCLG16|SR-PSOX|SRPSOX	17	Cytokines
CXCL17	284340	chemokine (C-X-C motif) ligand 17	DMC|Dcip1|MGC138300|UNQ473|VCC-1|VCC1	19	Cytokines
CXCL2	2920	chemokine (C-X-C motif) ligand 2	CINC-2a|GRO2|GROb|MGSA-b|MIP-2a|MIP2|MIP2A|SCYB2	4	Cytokines
CXCL3	2921	chemokine (C-X-C motif) ligand 3	CINC-2b|GRO3|GROg|MIP-2b|MIP2B|SCYB3	4	Cytokines
CXCL5	6374	chemokine (C-X-C motif) ligand 5	ENA-78|SCYB5	4	Cytokines
CXCL6	6372	chemokine (C-X-C motif) ligand 6 (granulocyte chemotactic protein 2)	CKA-3|GCP-2|GCP2|SCYB6	4	Cytokines
CXCL9	4283	chemokine (C-X-C motif) ligand 9	CMK|Humig|MIG|SCYB9|crg-10	4	Cytokines
CYR61	3491	cysteine-rich, angiogenic inducer, 61	CCN1|GIG1|IGFBP10	1	Cytokines
DEFA1	1667	defensin, alpha 1	DEF1|DEFA2|HNP-1|HP-1|MGC138393|MRS	8	Cytokines
DEFA3	1668	defensin, alpha 3, neutrophil-specific	DEF3|HNP-3|HNP3|HP-3	8	Cytokines
DEFA5	1670	defensin, alpha 5, Paneth cell-specific	DEF5|HD-5|MGC129728	8	Cytokines
DEFB1	1672	defensin, beta 1	BD1|DEFB-1|DEFB101|HBD1|MGC51822	8	Cytokines
DEFB103A	55894	defensin, beta 103A	DEFB103|DEFB3|HBD-3|HBD3|HBP-3|HBP3	8	Cytokines
DEFB104A	140596	defensin, beta 104A	BD-4|DEFB-4|DEFB104|DEFB4|MGC118942|MGC118944|MGC118945|hBD-4	8	Cytokines
DEFB4	1673	defensin, beta 4	DEFB-2|DEFB102|DEFB2|HBD-2|SAP1	8	Cytokines
DKK1	22943	dickkopf homolog 1 (Xenopus laevis)	DKK-1|SK	10	Cytokines
EBI3	10148	Epstein-Barr virus induced 3	IL27B	19	Cytokines
EDN1	1906	endothelin 1	ET1|HDLCQ7	6	Cytokines
EDN2	1907	endothelin 2	ET2|PPET2	1	Cytokines
EDN3	1908	endothelin 3	ET3|MGC15067|MGC61498	20	Cytokines
EGF	1950	epidermal growth factor (beta-urogastrone)	HOMG4|URG	4	Cytokines
EPGN	255324	epithelial mitogen homolog (mouse)	ALGV3072|EPG|FLJ75542|PRO9904|epigen	4	Cytokines
EPO	2056	erythropoietin	EP|MGC138142|MVCD2	7	Cytokines
EREG	2069	epiregulin	ER	4	Cytokines
ESM1	11082	endothelial cell-specific molecule 1	endocan	5	Cytokines
FAM3B	54097	family with sequence similarity 3, member B	2-21|C21orf11|C21orf76|ORF9|PANDER|PRED44	21	Cytokines
FAM3C	10447	family with sequence similarity 3, member C	GS3786|ILEI	7	Cytokines
FAM3D	131177	family with sequence similarity 3, member D	EF7|OIT1	3	Cytokines
FASLG	356	Fas ligand (TNF superfamily, member 6)	APT1LG1|CD178|CD95L|FASL|TNFSF6	1	Cytokines
FGF1	2246	fibroblast growth factor 1 (acidic)	AFGF|ECGF|ECGF-beta|ECGFA|ECGFB|FGF-alpha|FGFA|GLIO703|HBGF1	5	Cytokines
FGF10	2255	fibroblast growth factor 10	-	5	Cytokines
FGF11	2256	fibroblast growth factor 11	FHF3|FLJ16061|MGC102953|MGC45269	17	Cytokines
FGF12	2257	fibroblast growth factor 12	FGF12B|FHF1	3	Cytokines
FGF13	2258	fibroblast growth factor 13	FGF2|FHF-2|FHF2	X	Cytokines
FGF14	2259	fibroblast growth factor 14	FHF4|MGC119129|SCA27	13	Cytokines
FGF16	8823	fibroblast growth factor 16	-	X	Cytokines
FGF17	8822	fibroblast growth factor 17	FGF-13	8	Cytokines
FGF18	8817	fibroblast growth factor 18	FGF-18|ZFGF5	5	Cytokines
FGF19	9965	fibroblast growth factor 19	-	11	Cytokines
FGF2	2247	fibroblast growth factor 2 (basic)	BFGF|FGFB|HBGF-2	4	Cytokines
FGF20	26281	fibroblast growth factor 20	-	8	Cytokines
FGF21	26291	fibroblast growth factor 21	-	19	Cytokines
FGF22	27006	fibroblast growth factor 22	-	19	Cytokines
FGF23	8074	fibroblast growth factor 23	ADHR|HPDR2|HYPF|PHPTC	12	Cytokines
FGF3	2248	fibroblast growth factor 3 (murine mammary tumor virus integration site (v-int-2) oncogene homolog)	HBGF-3|INT2	11	Cytokines
FGF4	2249	fibroblast growth factor 4	HBGF-4|HST|HST-1|HSTF1|K-FGF|KFGF	11	Cytokines
FGF5	2250	fibroblast growth factor 5	HBGF-5|Smag-82	4	Cytokines
FGF6	2251	fibroblast growth factor 6	HBGF-6|HST2	12	Cytokines
FGF7	2252	fibroblast growth factor 7 (keratinocyte growth factor)	HBGF-7|KGF	15	Cytokines
FGF8	2253	fibroblast growth factor 8 (androgen-induced)	AIGF|HBGF-8|KAL6|MGC149376	10	Cytokines
FGF9	2254	fibroblast growth factor 9 (glia-activating factor)	GAF|HBFG-9|MGC119914|MGC119915	13	Cytokines
FIGF	2277	c-fos induced growth factor (vascular endothelial growth factor D)	VEGF-D|VEGFD	X	Cytokines
FIGNL2	401720	fidgetin-like 2	-	12	Cytokines
FLT3LG	2323	fms-related tyrosine kinase 3 ligand	FL	19	Cytokines
FSHB	2488	follicle stimulating hormone, beta polypeptide	-	11	Cytokines
GAL	51083	galanin prepropeptide	GALN|GLNN|GMAP|MGC40167	11	Cytokines
GALP	85569	galanin-like peptide	-	19	Cytokines
GAST	2520	gastrin	GAS	17	Cytokines
GCG	2641	glucagon	GLP1|GLP2|GRPP	2	Cytokines
GDF1	2657	growth differentiation factor 1	-	19	Cytokines
GDF10	2662	growth differentiation factor 10	BMP-3b|BMP3B	10	Cytokines
GDF11	10220	growth differentiation factor 11	BMP-11|BMP11	12	Cytokines
GDF15	9518	growth differentiation factor 15	GDF-15|MIC-1|MIC1|NAG-1|PDF|PLAB|PTGFB	19	Cytokines
GDF2	2658	growth differentiation factor 2	BMP-9|BMP9	10	Cytokines
GDF3	9573	growth differentiation factor 3	-	12	Cytokines
GDF5	8200	growth differentiation factor 5	BMP14|CDMP1|LAP4|OS5|SYNS2	20	Cytokines
GDF6	392255	growth differentiation factor 6	BMP13|CDMP2|KFS|KFSL|MGC158100|MGC158101|SGM1	8	Cytokines
GDF7	151449	growth differentiation factor 7	BMP12	2	Cytokines
GDF9	2661	growth differentiation factor 9	-	5	Cytokines
GDNF	2668	glial cell derived neurotrophic factor	ATF1|ATF2|HFB1-GDNF	5	Cytokines
GH1	2688	growth hormone 1	GH|GH-N|GHN|hGH-N	17	Cytokines
GH2	2689	growth hormone 2	GH-V|GHL|GHV|hGH-V	17	Cytokines
GHRH	2691	growth hormone releasing hormone	GHRF|GRF|MGC119781	20	Cytokines
GHRL	51738	ghrelin/obestatin prepropeptide	MTLRP|obestatin	3	Cytokines
GIP	2695	gastric inhibitory polypeptide	-	17	Cytokines
GKN1	56287	gastrokine 1	AMP18|BRICD1|CA11|FOV|MGC70354|foveolin	2	Cytokines
GMFB	2764	glia maturation factor, beta	GMF	14	Cytokines
GMFG	9535	glia maturation factor, gamma	GMF-GAMMA|MGC126867	19	Cytokines
GNRH1	2796	gonadotropin-releasing hormone 1 (luteinizing-releasing hormone)	GNRH|GRH|LHRH|LNRH	8	Cytokines
GNRH2	2797	gonadotropin-releasing hormone 2	GnRH-II|LH-RHII	20	Cytokines
GPHA2	170589	glycoprotein hormone alpha 2	A2|GPA2|MGC126572|ZSIG51	11	Cytokines
GPHB5	122876	glycoprotein hormone beta 5	B5|GPB5|ZLUT1	14	Cytokines
GPI	2821	glucose phosphate isomerase	AMF|GNPI|NLK|PGI|PHI|SA-36	19	Cytokines
GREM1	26585	gremlin 1, cysteine knot superfamily, homolog (Xenopus laevis)	CKTSF1B1|DAND2|DRM|GREMLIN|IHG-2|MGC126660|PIG2	15	Cytokines
GREM2	64388	gremlin 2, cysteine knot superfamily, homolog (Xenopus laevis)	CKTSF1B2|DAND3|PRDC	1	Cytokines
GRN	2896	granulin	GEP|GP88|PCDGF|PEPI|PGRN	17	Cytokines
GRP	2922	gastrin-releasing peptide	BN|GRP-10|preproGRP|proGRP	18	Cytokines
GUCA2A	2980	guanylate cyclase activator 2A (guanylin)	GUANYLIN|GUCA2|STARA	1	Cytokines
HAMP	57817	hepcidin antimicrobial peptide	HEPC|HEPCIDIN|HFE2B|LEAP-1|LEAP1|PLTR	19	Cytokines
HBEGF	1839	heparin-binding EGF-like growth factor	DTR|DTS|DTSF|HEGFL	5	Cytokines
HDGF	3068	hepatoma-derived growth factor (high-mobility group protein 1-like)	DKFZp686J1764|FLJ96580|HMG1L2	1	Cytokines
HDGFRP3	50810	hepatoma-derived growth factor, related protein 3	CGI-142|HDGF2	15	Cytokines
HGF	3082	hepatocyte growth factor (hepapoietin A; scatter factor)	F-TCF|HGFB|HPTA|SF	7	Cytokines
HTN3	3347	histatin 3	HIS2|HTN2|HTN5	4	Cytokines
IAPP	3375	islet amyloid polypeptide	AMYLIN|DAP|IAP	12	Cytokines
IFNA1	3439	interferon, alpha 1	IFL|IFN|IFN-ALPHA|IFNA13|IFNA@|MGC138207|MGC138505|MGC138507	9	Cytokines
IFNA10	3446	interferon, alpha 10	MGC119878|MGC119879	9	Cytokines
IFNA13	3447	interferon, alpha 13	-	9	Cytokines
IFNA14	3448	interferon, alpha 14	LEIF2H|MGC125756|MGC125757	9	Cytokines
IFNA16	3449	interferon, alpha 16	-	9	Cytokines
IFNA17	3451	interferon, alpha 17	IFNA|INFA|LEIF2C1	9	Cytokines
IFNA2	3440	interferon, alpha 2	IFNA|INFA2|MGC125764|MGC125765	9	Cytokines
IFNA21	3452	interferon, alpha 21	MGC126687|MGC126689	9	Cytokines
IFNA4	3441	interferon, alpha 4	INFA4|MGC142200	9	Cytokines
IFNA5	3442	interferon, alpha 5	INFA5	9	Cytokines
IFNA6	3443	interferon, alpha 6	-	9	Cytokines
IFNA7	3444	interferon, alpha 7	IFNA-J	9	Cytokines
IFNA8	3445	interferon, alpha 8	-	9	Cytokines
IFNB1	3456	interferon, beta 1, fibroblast	IFB|IFF|IFNB|MGC96956	9	Cytokines
IFNE	338376	interferon, epsilon	IFN-E|IFNE1|IFNT1|MGC119018|MGC119020|PRO655	9	Cytokines
IFNG	3458	interferon, gamma	IFG|IFI	12	Cytokines
IFNK	56832	interferon, kappa	RP11-27J8.1	9	Cytokines
IFNW1	3467	interferon, omega 1	-	9	Cytokines
IGF1	3479	insulin-like growth factor 1 (somatomedin C)	IGF1A|IGFI	12	Cytokines
IGF2	3481	insulin-like growth factor 2 (somatomedin A)	C11orf43|FLJ22066|FLJ44734|INSIGF|pp9974	11	Cytokines
IL10	3586	interleukin 10	CSIF|IL-10|IL10A|MGC126450|MGC126451|TGIF	1	Cytokines
IL11	3589	interleukin 11	AGIF|IL-11	19	Cytokines
IL12A	3592	interleukin 12A (natural killer cell stimulatory factor 1, cytotoxic lymphocyte maturation factor 1, p35)	CLMF|IL-12A|NFSK|NKSF1|P35	3	Cytokines
IL12B	3593	interleukin 12B (natural killer cell stimulatory factor 2, cytotoxic lymphocyte maturation factor 2, p40)	CLMF|CLMF2|IL-12B|NKSF|NKSF2	5	Cytokines
IL13	3596	interleukin 13	ALRH|BHR1|IL-13|MGC116786|MGC116788|MGC116789|P600	5	Cytokines
IL15	3600	interleukin 15	IL-15|MGC9721	4	Cytokines
IL16	3603	interleukin 16 (lymphocyte chemoattractant factor)	FLJ16806|FLJ42735|FLJ44234|HsT19289|IL-16|LCF|prIL-16	15	Cytokines
IL17A	3605	interleukin 17A	CTLA8|IL-17|IL-17A|IL17	6	Cytokines
IL17B	27190	interleukin 17B	IL-17B|IL-20|MGC138900|MGC138901|ZCYTO7	5	Cytokines
IL17C	27189	interleukin 17C	CX2|IL-17C|IL-21|MGC126884|MGC138401	16	Cytokines
IL17D	53342	interleukin 17D	FLJ30846|IL-17D|IL-22|IL-27|IL27	13	Cytokines
IL17F	112744	interleukin 17F	IL-17F|ML-1|ML1	6	Cytokines
IL18	3606	interleukin 18 (interferon-gamma-inducing factor)	IGIF|IL-18|IL-1g|IL1F4|MGC12320	11	Cytokines
IL19	29949	interleukin 19	IL-10C|MDA1|NG.1|ZMDA1	1	Cytokines
IL1A	3552	interleukin 1, alpha	IL-1A|IL1|IL1-ALPHA|IL1F1	2	Cytokines
IL1B	3553	interleukin 1, beta	IL-1|IL1-BETA|IL1F2	2	Cytokines
IL1F10	84639	interleukin 1 family, member 10 (theta)	FIL1-theta|FKSG75|IL-1HY2|IL1-theta|MGC119831|MGC119832|MGC119833	2	Cytokines
IL1F5	26525	interleukin 1 family, member 5 (delta)	FIL1|FIL1(DELTA)|FIL1D|IL1HY1|IL1L1|IL1RP3|MGC29840	2	Cytokines
IL1F6	27179	interleukin 1 family, member 6 (epsilon)	FIL1|FIL1(EPSILON)|FIL1E|IL-1F6|IL1(EPSILON)|MGC129552|MGC129553	2	Cytokines
IL1F7	27178	interleukin 1 family, member 7 (zeta)	FIL1|FIL1(ZETA)|FIL1Z|IL-1F7|IL-1H4|IL-1RP1|IL1H4|IL1RP1	2	Cytokines
IL1F8	27177	interleukin 1 family, member 8 (eta)	FIL1|FIL1-(ETA)|FIL1H|IL-1F8|IL-1H2|IL1-ETA|IL1H2|MGC126880|MGC126882	2	Cytokines
IL1F9	56300	interleukin 1 family, member 9	IL-1F9|IL-1H1|IL-1RP2|IL1E|IL1H1|IL1RP2	2	Cytokines
IL1RN	3557	interleukin 1 receptor antagonist	ICIL-1RA|IL-1ra3|IL1F3|IL1RA|IRAP|MGC10430	2	Cytokines
IL2	3558	interleukin 2	IL-2|TCGF|lymphokine	4	Cytokines
IL20	50604	interleukin 20	IL-20|IL10D|MGC96907|ZCYTO10	1	Cytokines
IL21	59067	interleukin 21	IL-21|Za11	4	Cytokines
IL22	50616	interleukin 22	IL-21|IL-22|IL-D110|IL-TIF|IL21|ILTIF|MGC79382|MGC79384|TIFIL-23|TIFa|zcyto18	12	Cytokines
IL23A	51561	interleukin 23, alpha subunit p19	IL-23|IL-23A|IL23P19|MGC79388|P19|SGRF	12	Cytokines
IL24	11009	interleukin 24	C49A|FISP|IL-24|IL10B|MDA7|Mob-5|ST16|mda-7	1	Cytokines
IL25	64806	interleukin 25	IL-17E|IL-25|IL17E	14	Cytokines
IL26	55801	interleukin 26	AK155|IL-26	12	Cytokines
IL27	246778	interleukin 27	IL-27|IL-27A|IL27p28|IL30|MGC71873|p28	16	Cytokines
IL28A	282616	interleukin 28A (interferon, lambda 2)	IFNL2|IL-28A	19	Cytokines
IL28B	282617	interleukin 28B (interferon, lambda 3)	IFNL3|IL-28B|IL28C	19	Cytokines
IL29	282618	interleukin 29 (interferon, lambda 1)	IFNL1|IL-29	19	Cytokines
IL3	3562	interleukin 3 (colony-stimulating factor, multiple)	IL-3|MCGF|MGC79398|MGC79399|MULTI-CSF	5	Cytokines
IL31	386653	interleukin 31	IL-31	12	Cytokines
IL32	9235	interleukin 32	IL-32alpha|IL-32beta|IL-32delta|IL-32gamma|NK4|TAIF|TAIFa|TAIFb|TAIFc|TAIFd	16	Cytokines
IL33	90865	interleukin 33	C9orf26|DKFZp586H0523|DVS27|NF-HEV|NFEHEV|RP11-575C20.2	9	Cytokines
IL34	146433	interleukin 34	C16orf77|IL-34|MGC34647	16	Cytokines
IL4	3565	interleukin 4	BCGF-1|BCGF1|BSF1|IL-4|MGC79402	5	Cytokines
IL5	3567	interleukin 5 (colony-stimulating factor, eosinophil)	EDF|IL-5|TRF	5	Cytokines
IL6	3569	interleukin 6 (interferon, beta 2)	BSF2|HGF|HSF|IFNB2|IL-6	7	Cytokines
IL6ST	3572	interleukin 6 signal transducer (gp130, oncostatin M receptor)	CD130|CDw130|GP130|GP130-RAPS|IL6R-beta	5	Cytokines
IL7	3574	interleukin 7	IL-7	8	Cytokines
IL8	3576	interleukin 8	CXCL8|GCP-1|GCP1|LECT|LUCT|LYNAP|MDNCF|MONAP|NAF|NAP-1|NAP1	4	Cytokines
IL9	3578	interleukin 9	HP40|IL-9|P40	5	Cytokines
INHA	3623	inhibin, alpha	-	2	Cytokines
INHBA	3624	inhibin, beta A	EDF|FRP	7	Cytokines
INHBB	3625	inhibin, beta B	MGC157939	2	Cytokines
INHBC	3626	inhibin, beta C	IHBC	12	Cytokines
INHBE	83729	inhibin, beta E	MGC4638	12	Cytokines
INS	3630	insulin	ILPR|IRDN	11	Cytokines
INS-IGF2	723961	INS-IGF2 readthrough transcript	-	11	Cytokines
INSL3	3640	insulin-like 3 (Leydig cell)	MGC119818|MGC119819|RLF|RLNL	19	Cytokines
INSL4	3641	insulin-like 4 (placenta)	EPIL|PLACENTIN	9	Cytokines
INSL5	10022	insulin-like 5	MGC126695|MGC126697|PRO182|UNQ156	1	Cytokines
INSL6	11172	insulin-like 6	RIF1	9	Cytokines
JAG1	182	jagged 1 (Alagille syndrome)	AGS|AHD|AWS|CD339|HJ1|JAGL1|MGC104644	20	Cytokines
JAG2	3714	jagged 2	HJ2|SER2	14	Cytokines
KGFLP1	387628	keratinocyte growth factor-like protein 1	MGC125746|MGC125747|MGC126891	9	Cytokines
KGFLP2	654466	keratinocyte growth factor-like protein 2	-	9	Cytokines
KITLG	4254	KIT ligand	DKFZp686F2250|KL-1|Kitl|MGF|SCF|SF|SHEP7	12	Cytokines
KL	9365	klotho	-	13	Cytokines
LACRT	90070	lacritin	MGC71934	12	Cytokines
LECT2	3950	leukocyte cell-derived chemotaxin 2	MGC126628|chm-II|chm2	5	Cytokines
LEFTY1	10637	left-right determination factor 1	LEFTB|LEFTYB	1	Cytokines
LEFTY2	7044	left-right determination factor 2	EBAF|LEFTA|LEFTYA|MGC46222|TGFB4	1	Cytokines
LEP	3952	leptin	FLJ94114|OB|OBS	7	Cytokines
LHB	3972	luteinizing hormone beta polypeptide	CGB4|LSH-B|hLHB	19	Cytokines
LIF	3976	leukemia inhibitory factor (cholinergic differentiation factor)	CDF|DIA|HILDA	22	Cytokines
LRSAM1	90678	leucine rich repeat and sterile alpha motif containing 1	FLJ31641|RIFLE|TAL	9	Cytokines
LTA	4049	lymphotoxin alpha (TNF superfamily, member 1)	LT|TNFB|TNFSF1	6	Cytokines
LTB	4050	lymphotoxin beta (TNF superfamily, member 3)	TNFC|TNFSF3|p33	6	Cytokines
LTBP1	4052	latent transforming growth factor beta binding protein 1	MGC163161	2	Cytokines
LTBP2	4053	latent transforming growth factor beta binding protein 2	C14orf141|LTBP3|MSTP031	14	Cytokines
LTBP3	4054	latent transforming growth factor beta binding protein 3	DKFZp586M2123|FLJ33431|FLJ39893|FLJ42533|FLJ44138|FLJ45576|LTBP-3|LTBP2|pp6425	11	Cytokines
LTBP4	8425	latent transforming growth factor beta binding protein 4	FLJ46318|FLJ90018|LTBP-4|LTBP-4L	19	Cytokines
MDK	4192	midkine (neurite growth-promoting factor 2)	FLJ27379|MK|NEGF2	11	Cytokines
MIA	8190	melanoma inhibitory activity	CD-RAP	19	Cytokines
MIF	4282	macrophage migration inhibitory factor (glycosylation-inhibiting factor)	GIF|GLIF|MMIF	22	Cytokines
MLN	4295	motilin	MGC138519	6	Cytokines
MSTN	2660	myostatin	GDF8	2	Cytokines
NAMPT	10135	nicotinamide phosphoribosyltransferase	1110035O14Rik|DKFZp666B131|MGC117256|PBEF|PBEF1|VF|VISFATIN	7	Cytokines
NDP	4693	Norrie disease (pseudoglioma)	EVR2|FEVR|ND	X	Cytokines
NENF	29937	neuron derived neurotrophic factor	CIR2|NEUDESIN|SCIRP10|SPUF	1	Cytokines
NGF	4803	nerve growth factor (beta polypeptide)	Beta-NGF|HSAN5|MGC161426|MGC161428|NGFB	1	Cytokines
NMB	4828	neuromedin B	MGC17211|MGC2277|MGC3936	15	Cytokines
NODAL	4838	nodal homolog (mouse)	MGC138230	10	Cytokines
NOV	4856	nephroblastoma overexpressed gene	CCN3|IGFBP9	8	Cytokines
NPFF	8620	neuropeptide FF-amide peptide precursor	FMRFAL	12	Cytokines
NPPA	4878	natriuretic peptide precursor A	ANF|ANP|ATFB6|CDD-ANF|PND	1	Cytokines
NPPB	4879	natriuretic peptide precursor B	BNP	1	Cytokines
NPPC	4880	natriuretic peptide precursor C	CNP	2	Cytokines
NPY	4852	neuropeptide Y	PYY4	7	Cytokines
NRG1	3084	neuregulin 1	ARIA|GGF|GGF2|HGL|HRG|HRG1|HRGA|NDF|SMDF	8	Cytokines
NRG2	9542	neuregulin 2	Don-1|HRG2|NTAK	5	Cytokines
NRG3	10718	neuregulin 3	HRG3|pro-NRG3	10	Cytokines
NRG4	145957	neuregulin 4	DKFZp779N0541|DKFZp779N1944|HRG4	15	Cytokines
NRTN	4902	neurturin	NTN	19	Cytokines
NTF3	4908	neurotrophin 3	HDNF|MGC129711|NGF-2|NGF2|NT3	12	Cytokines
NTF4	4909	neurotrophin 4	NT-4/5|NT4|NT5|NTF5	19	Cytokines
NTS	4922	neurotensin	NMN-125|NN|NT|NT/N|NTS1	12	Cytokines
NUDT6	11162	nudix (nucleoside diphosphate linked moiety X)-type motif 6	ASFGF2|FGF-2|FGF-AS|FGF2AS|bFGF|gfg|gfg-1	4	Cytokines
OGN	4969	osteoglycin	DKFZp586P2421|OG|OIF|SLRR3A	9	Cytokines
OSGIN1	29948	oxidative stress induced growth inhibitor 1	BDGI|OKL38	16	Cytokines
OSM	5008	oncostatin M	MGC20461	22	Cytokines
OSTN	344901	osteocrin	MUSCLIN	3	Cytokines
OXT	5020	oxytocin, prepropeptide	MGC126890|MGC126892|OT|OT-NPI	20	Cytokines
P11	8909	26 serine protease	MGC133268|PP11|PRSS26	12	Cytokines
PDGFA	5154	platelet-derived growth factor alpha polypeptide	PDGF-A|PDGF1	7	Cytokines
PDGFB	5155	platelet-derived growth factor beta polypeptide (simian sarcoma viral (v-sis) oncogene homolog)	FLJ12858|PDGF2|SIS|SSV|c-sis	22	Cytokines
PDGFC	56034	platelet derived growth factor C	FALLOTEIN|SCDGF	4	Cytokines
PDGFD	80310	platelet derived growth factor D	IEGF|MGC26867|MSTP036|SCDGF-B|SCDGFB	11	Cytokines
PDGFRA	5156	platelet-derived growth factor receptor, alpha polypeptide	CD140A|MGC74795|PDGFR2|Rhe-PDGFRA	4	Cytokines
PDGFRB	5159	platelet-derived growth factor receptor, beta polypeptide	CD140B|JTK12|PDGF-R-beta|PDGFR|PDGFR1	5	Cytokines
PDGFRL	5157	platelet-derived growth factor receptor-like	PDGRL|PRLTS	8	Cytokines
PDYN	5173	prodynorphin	MGC26418|PENKB	20	Cytokines
PENK	5179	proenkephalin	-	8	Cytokines
PF4	5196	platelet factor 4	CXCL4|MGC138298|SCYB4	4	Cytokines
PF4V1	5197	platelet factor 4 variant 1	CXCL4L1|CXCL4V1|PF4-ALT|PF4A|SCYB4V1	4	Cytokines
PGF	5228	placental growth factor	D12S1900|PGFL|PLGF|PlGF-2|SHGC-10760	14	Cytokines
PLAU	5328	plasminogen activator, urokinase	ATF|UPA|URK|u-PA	10	Cytokines
PMCH	5367	pro-melanin-concentrating hormone	MCH	12	Cytokines
PNOC	5368	prepronociceptin	PPNOC	8	Cytokines
POMC	5443	proopiomelanocortin	ACTH|CLIP|LPH|MSH|NPP|POC	2	Cytokines
PPBP	5473	pro-platelet basic protein (chemokine (C-X-C motif) ligand 7)	B-TG1|Beta-TG|CTAP-III|CTAP3|CTAPIII|CXCL7|LA-PF4|LDGF|MDGF|NAP-2|PBP|SCYB7|TC1|TC2|TGB|TGB1|THBGB|THBGB1	4	Cytokines
PPBPL1	728045	pro-platelet basic protein-like 1	TGB2	4	Cytokines
PPBPL2	10895	pro-platelet basic protein-like 2	SPBPBP	4	Cytokines
PPY	5539	pancreatic polypeptide	PNP	17	Cytokines
PRL	5617	prolactin	-	6	Cytokines
PRLH	51052	prolactin releasing hormone	PRH|PRRP	2	Cytokines
PROK1	84432	prokineticin 1	EGVEGF|PK1|PRK1	1	Cytokines
PROK2	60675	prokineticin 2	BV8|KAL4|MIT1|PK2	3	Cytokines
PSPN	5623	persephin	PSP	19	Cytokines
PTH	5741	parathyroid hormone	PTH1	11	Cytokines
PTH2	113091	parathyroid hormone 2	TIP39	19	Cytokines
PTHLH	5744	parathyroid hormone-like hormone	HHM|MGC14611|PLP|PTHR|PTHRP	12	Cytokines
PTN	5764	pleiotrophin	HARP|HBGF8|HBNF|NEGF1	7	Cytokines
PYY	5697	peptide YY	PYY1	17	Cytokines
QRFP	347148	pyroglutamylated RFamide peptide	26RFa|MGC119794|P518	9	Cytokines
RABEP1	9135	rabaptin, RAB GTPase binding effector protein 1	RAB5EP|RABPT5	17	Cytokines
RABEP2	79874	rabaptin, RAB GTPase binding effector protein 2	FLJ23282|FRA	16	Cytokines
REG1A	5967	regenerating islet-derived 1 alpha	ICRF|MGC12447|P19|PSP|PSPS|PSPS1|PTP|REG	2	Cytokines
RETN	56729	resistin	ADSF|FIZZ3|MGC126603|MGC126609|RETN1|RSTN|XCP1	19	Cytokines
RETNLB	84666	resistin like beta	FIZZ1|FIZZ2|HXCP2|RELM-beta|RELMb|RELMbeta|XCP2	3	Cytokines
RLN1	6013	relaxin 1	H1|RLXH1|bA12D24.3.1|bA12D24.3.2	9	Cytokines
RLN2	6019	relaxin 2	H2|RLXH2|bA12D24.1.1|bA12D24.1.2	9	Cytokines
RLN3	117579	relaxin 3	H3|RXN3|ZINS4|insl7	19	Cytokines
RNASE2	6036	ribonuclease, RNase A family, 2 (liver, eosinophil-derived neurotoxin)	EDN|RNS2	14	Cytokines
S100A6	6277	S100 calcium binding protein A6	2A9|5B10|CABP|CACY|PRA	1	Cytokines
SAA1	6288	serum amyloid A1	MGC111216|PIG4|SAA|TP53I4	11	Cytokines
SAA2	6289	serum amyloid A2	-	11	Cytokines
SBDS	51119	Shwachman-Bodian-Diamond syndrome	CGI-97|FLJ10917|SDS|SWDS	7	Cytokines
SCG2	7857	secretogranin II (chromogranin C)	CHGC|SN|SgII	2	Cytokines
SCGB3A1	92304	secretoglobin, family 3A, member 1	HIN-1|HIN1|LU105|MGC87867|PnSP-2|UGRP2	5	Cytokines
SCT	6343	secretin	-	11	Cytokines
SCYE1	9255	small inducible cytokine subfamily E, member 1 (endothelial monocyte-activating)	AIMP1|EMAP2|EMAPII|p43	4	Cytokines
SECTM1	6398	secreted and transmembrane 1	K12	17	Cytokines
SEMA3A	10371	sema domain, immunoglobulin domain (Ig), short basic domain, secreted, (semaphorin) 3A	Hsema-I|Hsema-III|MGC133243|SEMA1|SEMAD|SEMAIII|SEMAL|SemD|coll-1	7	Cytokines
SEMA3B	7869	sema domain, immunoglobulin domain (Ig), short basic domain, secreted, (semaphorin) 3B	FLJ34863|LUCA-1|SEMA5|SEMAA|SemA|semaV	3	Cytokines
SEMA3C	10512	sema domain, immunoglobulin domain (Ig), short basic domain, secreted, (semaphorin) 3C	SEMAE|SemE	7	Cytokines
SEMA3D	223117	sema domain, immunoglobulin domain (Ig), short basic domain, secreted, (semaphorin) 3D	MGC39708|Sema-Z2|coll-2	7	Cytokines
SEMA3E	9723	sema domain, immunoglobulin domain (Ig), short basic domain, secreted, (semaphorin) 3E	KIAA0331|M-SEMAH|M-SemaK|SEMAH|coll-5	7	Cytokines
SEMA3F	6405	sema domain, immunoglobulin domain (Ig), short basic domain, secreted, (semaphorin) 3F	SEMA-IV|SEMA4|SEMAK	3	Cytokines
SEMA3G	56920	sema domain, immunoglobulin domain (Ig), short basic domain, secreted, (semaphorin) 3G	FLJ00014|MGC119473|sem2	3	Cytokines
SEMA4A	64218	sema domain, immunoglobulin domain (Ig), transmembrane domain (TM) and short cytoplasmic domain, (semaphorin) 4A	CORD10|FLJ12287|RP35|SEMAB|SEMB	1	Cytokines
SEMA4B	10509	sema domain, immunoglobulin domain (Ig), transmembrane domain (TM) and short cytoplasmic domain, (semaphorin) 4B	KIAA1745|MGC131831|SEMAC|SemC	15	Cytokines
SEMA4C	54910	sema domain, immunoglobulin domain (Ig), transmembrane domain (TM) and short cytoplasmic domain, (semaphorin) 4C	FLJ20369|KIAA1739|M-SEMA-F|MGC126382|MGC126383|SEMACL1|SEMAF|SEMAI	2	Cytokines
SEMA4D	10507	sema domain, immunoglobulin domain (Ig), transmembrane domain (TM) and short cytoplasmic domain, (semaphorin) 4D	C9orf164|CD100|FLJ33485|FLJ34282|FLJ39737|FLJ46484|M-sema-G|MGC169138|MGC169141|SEMAJ|coll-4	9	Cytokines
SEMA4F	10505	sema domain, immunoglobulin domain (Ig), transmembrane domain (TM) and short cytoplasmic domain, (semaphorin) 4F	M-SEMA|PRO2353|SEMAM|SEMAW|m-Sema-M	2	Cytokines
SEMA4G	57715	sema domain, immunoglobulin domain (Ig), transmembrane domain (TM) and short cytoplasmic domain, (semaphorin) 4G	FLJ20590|KIAA1619|MGC102867	10	Cytokines
SEMA5A	9037	sema domain, seven thrombospondin repeats (type 1 and type 1-like), transmembrane domain (TM) and short cytoplasmic domain, (semaphorin) 5A	FLJ12815|SEMAF|semF	5	Cytokines
SEMA5B	54437	sema domain, seven thrombospondin repeats (type 1 and type 1-like), transmembrane domain (TM) and short cytoplasmic domain, (semaphorin) 5B	FLJ10372|KIAA1445|SEMAG|SemG	3	Cytokines
SEMA6A	57556	sema domain, transmembrane domain (TM), and cytoplasmic domain, (semaphorin) 6A	HT018|KIAA1368|SEMA|SEMA6A1|SEMAQ|VIA	5	Cytokines
SEMA6B	10501	sema domain, transmembrane domain (TM), and cytoplasmic domain, (semaphorin) 6B	SEM-SEMA-Y|SEMA-VIB|SEMAN|semaZ	19	Cytokines
SEMA6C	10500	sema domain, transmembrane domain (TM), and cytoplasmic domain, (semaphorin) 6C	SEMAY|m-SemaY|m-SemaY2	1	Cytokines
SEMA6D	80031	sema domain, transmembrane domain (TM), and cytoplasmic domain, (semaphorin) 6D	FLJ11598|KIAA1479	15	Cytokines
SEMA7A	8482	semaphorin 7A, GPI membrane anchor (John Milton Hagen blood group)	CD108|CDw108|H-SEMA-K1|H-Sema-L|JMH|MGC126692|MGC126696|SEMAK1|SEMAL	15	Cytokines
SLIT1	6585	slit homolog 1 (Drosophila)	MEGF4|MGC164811|SLIL1|SLIT3|Slit-1	10	Cytokines
SLIT2	9353	slit homolog 2 (Drosophila)	FLJ14420|SLIL3|Slit-2	4	Cytokines
SLURP1	57152	secreted LY6/PLAUR domain containing 1	ANUP|ARS|ArsB|LY6LS|MDM	8	Cytokines
SPP1	6696	secreted phosphoprotein 1	BNSP|BSPI|ETA-1|MGC110940|OPN	4	Cytokines
SST	6750	somatostatin	SMST	3	Cytokines
STC1	6781	stanniocalcin 1	STC	8	Cytokines
STC2	8614	stanniocalcin 2	STC-2|STCRP	5	Cytokines
TAC1	6863	tachykinin, precursor 1	Hs.2563|NK2|NKNA|NPK|TAC2	7	Cytokines
TDGF1	6997	teratocarcinoma-derived growth factor 1	CR|CRGF|CRIPTO|Cripto-1	3	Cytokines
TDGF3	6998	teratocarcinoma-derived growth factor 3, pseudogene	CR-3|CRIPTO|CRIPTO-3|TDGF1|TDGF2	X	Cytokines
TG	7038	thyroglobulin	AITD3|TGN	8	Cytokines
TGFA	7039	transforming growth factor, alpha	TFGA	2	Cytokines
TGFB1	7040	transforming growth factor, beta 1	CED|DPD1|TGFB|TGFbeta	19	Cytokines
TGFB2	7042	transforming growth factor, beta 2	MGC116892|TGF-beta2	1	Cytokines
TGFB3	7043	transforming growth factor, beta 3	ARVD|FLJ16571|TGF-beta3	14	Cytokines
THPO	7066	thrombopoietin	MGC163194|MGDF|MKCSF|ML|MPLLG|TPO	3	Cytokines
TNC	3371	tenascin C	HXB|MGC167029|TN	9	Cytokines
TNF	7124	tumor necrosis factor (TNF superfamily, member 2)	DIF|TNF-alpha|TNFA|TNFSF2	6	Cytokines
TNFRSF11B	4982	tumor necrosis factor receptor superfamily, member 11b	MGC29565|OCIF|OPG|TR1	8	Cytokines
TNFSF10	8743	tumor necrosis factor (ligand) superfamily, member 10	APO2L|Apo-2L|CD253|TL2|TRAIL	3	Cytokines
TNFSF11	8600	tumor necrosis factor (ligand) superfamily, member 11	CD254|ODF|OPGL|OPTB2|RANKL|TRANCE|hRANKL2|sOdf	13	Cytokines
TNFSF12	8742	tumor necrosis factor (ligand) superfamily, member 12	APO3L|DR3LG|MGC129581|MGC20669|TWEAK	17	Cytokines
TNFSF13	8741	tumor necrosis factor (ligand) superfamily, member 13	APRIL|CD256|TALL2|TRDL-1|UNQ383/PRO715|ligand	17	Cytokines
TNFSF13B	10673	tumor necrosis factor (ligand) superfamily, member 13b	BAFF|BLYS|CD257|DTL|TALL-1|TALL1|THANK|TNFSF20|ZTNF4	13	Cytokines
TNFSF14	8740	tumor necrosis factor (ligand) superfamily, member 14	CD258|HVEML|LIGHT|LTg|TR2	19	Cytokines
TNFSF15	9966	tumor necrosis factor (ligand) superfamily, member 15	MGC129934|MGC129935|TL1|TL1A|VEGI|VEGI192A	9	Cytokines
TNFSF18	8995	tumor necrosis factor (ligand) superfamily, member 18	AITRL|GITRL|MGC138237|TL6|hGITRL	1	Cytokines
TNFSF4	7292	tumor necrosis factor (ligand) superfamily, member 4	CD134L|CD252|GP34|OX-40L|OX4OL|TXGP1	1	Cytokines
TNFSF8	944	tumor necrosis factor (ligand) superfamily, member 8	CD153|CD30L|CD30LG|MGC138144	9	Cytokines
TNFSF9	8744	tumor necrosis factor (ligand) superfamily, member 9	4-1BB-L|CD137L	19	Cytokines
TOR2A	27433	torsin family 2, member A	FLJ14771|MGC99558|TORP1	9	Cytokines
TRH	7200	thyrotropin-releasing hormone	MGC125964|MGC125965	3	Cytokines
TSHB	7252	thyroid stimulating hormone, beta	CHNG4|TSH-BETA	1	Cytokines
TSLP	85480	thymic stromal lymphopoietin	-	5	Cytokines
TXLNA	200081	taxilin alpha	DKFZp451J0118|IL14|MGC118870|MGC118871|RP4-622L5.4|TXLN	1	Cytokines
TYMP	1890	thymidine phosphorylase	ECGF1|MNGIE|PDECGF|TP|hPD-ECGF	22	Cytokines
UCN	7349	urocortin	MGC129974|MGC129975|UI|UROC	2	Cytokines
UCN2	90226	urocortin 2	SRP|UCN-II|UCNI|UR|URP	3	Cytokines
UCN3	114131	urocortin 3 (stresscopin)	MGC119002|SCP|SPC|UCNIII	10	Cytokines
UTS2	10911	urotensin 2	PRO1068|U-II|UCN2|UII	1	Cytokines
UTS2D	257313	urotensin 2 domain containing	MGC138371|U2B|URP	3	Cytokines
VEGFA	7422	vascular endothelial growth factor A	MGC70609|MVCD1|VEGF|VEGF-A|VPF	6	Cytokines
VEGFB	7423	vascular endothelial growth factor B	VEGFL|VRF	11	Cytokines
VEGFC	7424	vascular endothelial growth factor C	Flt4-L|VRP	4	Cytokines
VGF	7425	VGF nerve growth factor inducible	-	7	Cytokines
VIP	7432	vasoactive intestinal peptide	MGC13587|PHM27	6	Cytokines
XCL1	6375	chemokine (C motif) ligand 1	ATAC|LPTN|LTN|SCM-1|SCM-1a|SCM1|SCYC1	1	Cytokines
XCL2	6846	chemokine (C motif) ligand 2	SCM-1b|SCM1B|SCYC2	1	Cytokines
ACVR1B	91	activin A receptor, type IB	ACTRIB|ACVRLK4|ALK4|SKR2	12	Cytokine_Receptors
ACVR1C	130399	activin A receptor, type IC	ACVRLK7|ALK7	2	Cytokine_Receptors
ACVR2A	92	activin A receptor, type IIA	ACTRII|ACVR2	2	Cytokine_Receptors
ACVR2B	93	activin A receptor, type IIB	ACTRIIB|ActR-IIB|MGC116908	3	Cytokine_Receptors
ACVRL1	94	activin A receptor type II-like 1	ACVRLK1|ALK-1|ALK1|HHT|HHT2|ORW2|SKR3|TSR-I	12	Cytokine_Receptors
ADCYAP1R1	117	adenylate cyclase activating polypeptide 1 (pituitary) receptor type I	PAC1|PACAPR|PACAPRI	7	Cytokine_Receptors
ADIPOR1	51094	adiponectin receptor 1	ACDCR1|CGI-45|CGI45|FLJ25385|FLJ42464|PAQR1|TESBP1A	1	Cytokine_Receptors
ADIPOR2	79602	adiponectin receptor 2	ACDCR2|FLJ21432|MGC4640|PAQR2	12	Cytokine_Receptors
ADRB1	153	adrenergic, beta-1-, receptor	ADRB1R|B1AR|BETA1AR|RHR	10	Cytokine_Receptors
ADRB2	154	adrenergic, beta-2-, receptor, surface	ADRB2R|ADRBR|B2AR|BAR|BETA2AR	5	Cytokine_Receptors
AGTR1	185	angiotensin II receptor, type 1	AG2S|AGTR1A|AGTR1B|AT1|AT1B|AT1R|AT2R1|AT2R1A|AT2R1B|HAT1R	3	Cytokine_Receptors
AGTR2	186	angiotensin II receptor, type 2	AT2|ATGR2|MRX88	X	Cytokine_Receptors
AMHR2	269	anti-Mullerian hormone receptor, type II	AMHR|MISR2|MISRII	12	Cytokine_Receptors
ANGPT1	284	angiopoietin 1	AGP1|AGPT|ANG1	8	Cytokine_Receptors
ANGPT4	51378	angiopoietin 4	AGP4|ANG-3|ANG4|MGC138181|MGC138183	20	Cytokine_Receptors
ANGPTL1	9068	angiopoietin-like 1	ANG3|ANGPT3|ARP1|AngY|KIAA0351|UNQ162|dJ595C2.2	1	Cytokine_Receptors
ANGPTL2	23452	angiopoietin-like 2	ARP2|HARP|MGC8889	9	Cytokine_Receptors
ANGPTL3	27329	angiopoietin-like 3	ANGPT5	1	Cytokine_Receptors
ANGPTL4	51129	angiopoietin-like 4	ANGPTL2|ARP4|FIAF|HFARP|NL2|PGAR|pp1158	19	Cytokine_Receptors
ANGPTL6	83854	angiopoietin-like 6	AGF|ARP5	19	Cytokine_Receptors
APLNR	187	apelin receptor	AGTRL1|APJ|APJR|FLJ90771|MGC45246	11	Cytokine_Receptors
AR	367	androgen receptor	AIS|DHTR|HUMARA|HYSP1|KD|NR3C4|SBMA|SMAX1|TFM	X	Cytokine_Receptors
AVPR1A	552	arginine vasopressin receptor 1A	AVPR1	12	Cytokine_Receptors
AVPR1B	553	arginine vasopressin receptor 1B	AVPR3	1	Cytokine_Receptors
AVPR2	554	arginine vasopressin receptor 2	ADHR|DI1|DIR|DIR3|MGC126533|MGC138386|NDI|V2R	X	Cytokine_Receptors
BMPR1A	657	bone morphogenetic protein receptor, type IA	10q23del|ACVRLK3|ALK3|CD292|SKR5	10	Cytokine_Receptors
BMPR1B	658	bone morphogenetic protein receptor, type IB	ALK-6|ALK6|CDw293	4	Cytokine_Receptors
BMPR2	659	bone morphogenetic protein receptor, type II (serine/threonine kinase)	BMPR-II|BMPR3|BMR2|BRK-3|FLJ41585|FLJ76945|PPH1|T-ALK	2	Cytokine_Receptors
BRD8	10902	bromodomain containing 8	SMAP|SMAP2|p120	5	Cytokine_Receptors
C3AR1	719	complement component 3a receptor 1	AZ3B|C3AR|HNFAG09	12	Cytokine_Receptors
C5AR1	728	complement component 5a receptor 1	C5A|C5AR|C5R1|CD88	19	Cytokine_Receptors
CALCR	799	calcitonin receptor	CRT|CTR|CTR1	7	Cytokine_Receptors
CALCRL	10203	calcitonin receptor-like	CGRPR|CRLR	2	Cytokine_Receptors
CCBP2	1238	chemokine binding protein 2	CCR10|CCR9|CMKBR9|D6|MGC126678|MGC138250|hD6	3	Cytokine_Receptors
CCR1	1230	chemokine (C-C motif) receptor 1	CD191|CKR-1|CKR1|CMKBR1|HM145|MIP1aR|SCYAR1	3	Cytokine_Receptors
CCR10	2826	chemokine (C-C motif) receptor 10	GPR2	17	Cytokine_Receptors
CCR3	1232	chemokine (C-C motif) receptor 3	CC-CKR-3|CD193|CKR3|CMKBR3|MGC102841	3	Cytokine_Receptors
CCR4	1233	chemokine (C-C motif) receptor 4	CC-CKR-4|CD194|CKR4|CMKBR4|ChemR13|HGCN:14099|K5-5|MGC88293	3	Cytokine_Receptors
CCR5	1234	chemokine (C-C motif) receptor 5	CC-CKR-5|CCCKR5|CD195|CKR-5|CKR5|CMKBR5|FLJ78003|IDDM22	3	Cytokine_Receptors
CCR6	1235	chemokine (C-C motif) receptor 6	BN-1|CD196|CKR-L3|CKR6|CKRL3|CMKBR6|DCR2|DRY-6|GPR-CY4|GPR29|GPRCY4|STRL22	6	Cytokine_Receptors
CCR7	1236	chemokine (C-C motif) receptor 7	BLR2|CD197|CDw197|CMKBR7|EBI1	17	Cytokine_Receptors
CCR8	1237	chemokine (C-C motif) receptor 8	CDw198|CKR-L1|CKRL1|CMKBR8|CMKBRL2|CY6|GPR-CY6|MGC129966|MGC129973|TER1	3	Cytokine_Receptors
CCR9	10803	chemokine (C-C motif) receptor 9	CDw199|GPR-9-6|GPR28	3	Cytokine_Receptors
CCRL1	51554	chemokine (C-C motif) receptor-like 1	CC-CKR-11|CCBP2|CCR10|CCR11|CCX-CKR|CKR-11|PPR1|VSHK1	3	Cytokine_Receptors
CCRL2	9034	chemokine (C-C motif) receptor-like 2	CKRX|CRAM-A|CRAM-B|FLJ55815|HCR|MGC116710|MGC34104	3	Cytokine_Receptors
CD40	958	CD40 molecule, TNF receptor superfamily member 5	Bp50|CDW40|MGC9013|TNFRSF5|p50	20	Cytokine_Receptors
CMKLR1	1240	chemokine-like receptor 1	CHEMERINR|ChemR23|DEZ|MGC126105|MGC126106	12	Cytokine_Receptors
CNTFR	1271	ciliary neurotrophic factor receptor	MGC1774	9	Cytokine_Receptors
CRHR1	1394	corticotropin releasing hormone receptor 1	CRF-R|CRF1|CRFR1|CRH-R1h|CRHR|CRHR1f	17	Cytokine_Receptors
CRHR2	1395	corticotropin releasing hormone receptor 2	CRFR2	7	Cytokine_Receptors
CRIM1	51232	cysteine rich transmembrane BMP regulator 1 (chordin-like)	MGC138194|S52	2	Cytokine_Receptors
CRLF1	9244	cytokine receptor-like factor 1	CISS|CISS1|CLF|CLF-1|NR6	19	Cytokine_Receptors
CRLF2	64109	cytokine receptor-like factor 2	CRL2|CRLF2Y|TSLPR	X|Y	Cytokine_Receptors
CRLF3	51379	cytokine receptor-like factor 3	CREME9|CYTOR4|FRWS|MGC20661	17	Cytokine_Receptors
CSF1R	1436	colony stimulating factor 1 receptor	C-FMS|CD115|CSFR|FIM2|FMS	5	Cytokine_Receptors
CSF2RA	1438	colony stimulating factor 2 receptor, alpha, low-affinity (granulocyte-macrophage)	CD116|CDw116|CSF2R|CSF2RAX|CSF2RAY|CSF2RX|CSF2RY|GM-CSF-R-alpha|GMCSFR|GMR|MGC3848|MGC4838	X|Y	Cytokine_Receptors
CSF2RB	1439	colony stimulating factor 2 receptor, beta, low-affinity (granulocyte-macrophage)	CD131|CDw131|IL3RB|IL5RB	22	Cytokine_Receptors
CSF3R	1441	colony stimulating factor 3 receptor (granulocyte)	CD114|GCSFR	1	Cytokine_Receptors
CX3CR1	1524	chemokine (C-X3-C motif) receptor 1	CCRL1|CMKBRL1|CMKDR1|GPR13|GPRV28|V28	3	Cytokine_Receptors
CXCR3	2833	chemokine (C-X-C motif) receptor 3	CD182|CD183|CKR-L2|CMKAR3|GPR9|IP10-R|Mig-R|MigR	X	Cytokine_Receptors
CXCR4	7852	chemokine (C-X-C motif) receptor 4	CD184|D2S201E|FB22|HM89|HSY3RR|LAP3|LCR1|LESTR|NPY3R|NPYR|NPYRL|NPYY3R|WHIM	2	Cytokine_Receptors
CXCR5	643	chemokine (C-X-C motif) receptor 5	BLR1|CD185|MDR15|MGC117347	11	Cytokine_Receptors
CXCR6	10663	chemokine (C-X-C motif) receptor 6	BONZO|CD186|STRL33|TYMSTR	3	Cytokine_Receptors
CXCR7	57007	chemokine (C-X-C motif) receptor 7	CMKOR1|GPR159|RDC1	2	Cytokine_Receptors
CYSLTR1	10800	cysteinyl leukotriene receptor 1	CYSLT1|CYSLT1R|CYSLTR|HG55|HMTMF81|MGC46139	X	Cytokine_Receptors
CYSLTR2	57105	cysteinyl leukotriene receptor 2	CYSLT2|CYSLT2R|GPCR|HG57|HPN321|KPG_011|PSEC0146|hGPCR21	13	Cytokine_Receptors
DARC	2532	Duffy blood group, chemokine receptor	CCBP1|CD234|Dfy|FY|GPD|GpFy|WBCQ1	1	Cytokine_Receptors
EDNRA	1909	endothelin receptor type A	ETA|ETRA	4	Cytokine_Receptors
EDNRB	1910	endothelin receptor type B	ABCDS|ETB|ETBR|ETRB|HSCR|HSCR2	13	Cytokine_Receptors
EGFR	1956	epidermal growth factor receptor (erythroblastic leukemia viral (v-erb-b) oncogene homolog, avian)	ERBB|ERBB1|HER1|PIG61|mENA	7	Cytokine_Receptors
ENG	2022	endoglin	CD105|END|FLJ41744|HHT1|ORW|ORW1	9	Cytokine_Receptors
EPOR	2057	erythropoietin receptor	MGC138358	19	Cytokine_Receptors
ESR1	2099	estrogen receptor 1	DKFZp686N23123|ER|ESR|ESRA|Era|NR3A1	6	Cytokine_Receptors
ESR2	2100	estrogen receptor 2 (ER beta)	ER-BETA|ESR-BETA|ESRB|ESTRB|Erb|NR3A2	14	Cytokine_Receptors
ESRRA	2101	estrogen-related receptor alpha	ERR1|ERRa|ERRalpha|ESRL1|NR3B1	11	Cytokine_Receptors
ESRRB	2103	estrogen-related receptor beta	DFNB35|ERR2|ERRb|ERRbeta|ERRbeta-2|ESRL2|NR3B2	14	Cytokine_Receptors
ESRRG	2104	estrogen-related receptor gamma	DKFZp781L1617|ERR3|FLJ16023|KIAA0832|NR3B3	1	Cytokine_Receptors
FGFR1	2260	fibroblast growth factor receptor 1	BFGFR|CD331|CEK|FGFBR|FLG|FLJ99988|FLT2|HBGFR|KAL2|N-SAM|OGD	8	Cytokine_Receptors
FGFR2	2263	fibroblast growth factor receptor 2	BEK|BFR-1|CD332|CEK3|CFD1|ECT1|FLJ98662|JWS|K-SAM|KGFR|TK14|TK25	10	Cytokine_Receptors
FGFR3	2261	fibroblast growth factor receptor 3	ACH|CD333|CEK2|HSFGFR3EX|JTK4	4	Cytokine_Receptors
FGFR4	2264	fibroblast growth factor receptor 4	CD334|JTK2|MGC20292|TKF	5	Cytokine_Receptors
FGFRL1	53834	fibroblast growth factor receptor-like 1	FGFR5|FHFR	4	Cytokine_Receptors
FLT1	2321	fms-related tyrosine kinase 1 (vascular endothelial growth factor/vascular permeability factor receptor)	FLT|VEGFR1	13	Cytokine_Receptors
FLT3	2322	fms-related tyrosine kinase 3	CD135|FLK2|STK1	13	Cytokine_Receptors
FLT4	2324	fms-related tyrosine kinase 4	FLT41|LMPH1A|PCL|VEGFR3	5	Cytokine_Receptors
FPR1	2357	formyl peptide receptor 1	FMLP|FPR	19	Cytokine_Receptors
FPR2	2358	formyl peptide receptor 2	ALXR|FMLP-R-II|FMLPX|FPR2A|FPRH1|FPRH2|FPRL1|HM63|LXA4R	19	Cytokine_Receptors
FPR2	2358	formyl peptide receptor 2	ALXR|FMLP-R-II|FMLPX|FPR2A|FPRH1|FPRH2|FPRL1|HM63|LXA4R	19	Cytokine_Receptors
FSHR	2492	follicle stimulating hormone receptor	FSHRO|LGR1|MGC141667|MGC141668|ODG1	2	Cytokine_Receptors
GALR2	8811	galanin receptor 2	GALNR2|MGC125983|MGC125984	17	Cytokine_Receptors
GALR3	8484	galanin receptor 3	-	22	Cytokine_Receptors
GCGR	2642	glucagon receptor	GGR|MGC138246	17	Cytokine_Receptors
GHR	2690	growth hormone receptor	GHBP	5	Cytokine_Receptors
GHRHR	2692	growth hormone releasing hormone receptor	GHRFR|GHRHRpsv|GRFR	7	Cytokine_Receptors
GHSR	2693	growth hormone secretagogue receptor	-	3	Cytokine_Receptors
GIPR	2696	gastric inhibitory polypeptide receptor	MGC126722	19	Cytokine_Receptors
GLP1R	2740	glucagon-like peptide 1 receptor	MGC138331	6	Cytokine_Receptors
GLP2R	9340	glucagon-like peptide 2 receptor	-	17	Cytokine_Receptors
GNRHR	2798	gonadotropin-releasing hormone receptor	GNRHR1|GRHR|LHRHR|LRHR	4	Cytokine_Receptors
GPER	2852	G protein-coupled estrogen receptor 1	CEPR|CMKRL2|DRY12|FEG-1|GPCR-Br|GPR30|LERGU|LERGU2|LyGPR|MGC99678	7	Cytokine_Receptors
GPR17	2840	G protein-coupled receptor 17	DKFZp686M18273	2	Cytokine_Receptors
GPR32	2854	G protein-coupled receptor 32	-	19	Cytokine_Receptors
GPR33	2856	G protein-coupled receptor 33 (gene/pseudogene)	-	14	Cytokine_Receptors
GPR44	11251	G protein-coupled receptor 44	CD294|CRTH2|DP2	11	Cytokine_Receptors
GPR77	27202	G protein-coupled receptor 77	C5L2|GPF77	19	Cytokine_Receptors
HNF4A	3172	hepatocyte nuclear factor 4, alpha	FLJ39654|HNF4|HNF4a7|HNF4a8|HNF4a9|HNF4alpha|MODY|MODY1|NR2A1|NR2A21|TCF|TCF14	20	Cytokine_Receptors
HNF4G	3174	hepatocyte nuclear factor 4, gamma	NR2A2|NR2A3	8	Cytokine_Receptors
HTR3A	3359	5-hydroxytryptamine (serotonin) receptor 3A	5-HT-3|5-HT3A|5-HT3R|5HT3R|HTR3	11	Cytokine_Receptors
HTR3B	9177	5-hydroxytryptamine (serotonin) receptor 3B	5-HT3B	11	Cytokine_Receptors
HTR3C	170572	5-hydroxytryptamine (serotonin) receptor 3, family member C	-	3	Cytokine_Receptors
HTR3D	200909	5-hydroxytryptamine (serotonin) receptor 3 family member D	MGC119636|MGC119637	3	Cytokine_Receptors
HTR3E	285242	5-hydroxytryptamine (serotonin) receptor 3, family member E	5-HT3c1|MGC120035|MGC120036|MGC120037	3	Cytokine_Receptors
IFNAR1	3454	interferon (alpha, beta and omega) receptor 1	AVP|IFN-alpha-REC|IFNAR|IFNBR|IFRC	21	Cytokine_Receptors
IFNAR2	3455	interferon (alpha, beta and omega) receptor 2	IFN-R|IFN-alpha-REC|IFNABR|IFNARB	21	Cytokine_Receptors
IFNGR1	3459	interferon gamma receptor 1	CD119|FLJ45734|IFNGR	6	Cytokine_Receptors
IFNGR2	3460	interferon gamma receptor 2 (interferon gamma transducer 1)	AF-1|IFGR2|IFNGT1	21	Cytokine_Receptors
IGF1R	3480	insulin-like growth factor 1 receptor	CD221|IGFIR|IGFR|JTK13|MGC142170|MGC142172|MGC18216	15	Cytokine_Receptors
IGF2R	3482	insulin-like growth factor 2 receptor	CD222|CIMPR|M6P-R|MPR1|MPRI	6	Cytokine_Receptors
IL10RA	3587	interleukin 10 receptor, alpha	CDW210A|HIL-10R|IL-10R1|IL10R	11	Cytokine_Receptors
IL10RB	3588	interleukin 10 receptor, beta	CDW210B|CRF2-4|CRFB4|D21S58|D21S66|IL-10R2	21	Cytokine_Receptors
IL11RA	3590	interleukin 11 receptor, alpha	MGC2146	9	Cytokine_Receptors
IL11RB	3591	interleukin 11 receptor, beta	-	-	Cytokine_Receptors
IL12RB1	3594	interleukin 12 receptor, beta 1	CD212|IL-12R-BETA1|IL12RB|MGC34454	19	Cytokine_Receptors
IL12RB2	3595	interleukin 12 receptor, beta 2	-	1	Cytokine_Receptors
IL13RA1	3597	interleukin 13 receptor, alpha 1	CD213A1|IL-13Ra|NR4	X	Cytokine_Receptors
IL13RA2	3598	interleukin 13 receptor, alpha 2	CD213A2|CT19|IL-13R|IL13BP	X	Cytokine_Receptors
IL15RA	3601	interleukin 15 receptor, alpha	MGC104179	10	Cytokine_Receptors
IL15RB	3602	interleukin 15 receptor, beta	-	-	Cytokine_Receptors
IL17RA	23765	interleukin 17 receptor A	CD217|CDw217|IL-17RA|IL17R|MGC10262|hIL-17R	22	Cytokine_Receptors
IL17RB	55540	interleukin 17 receptor B	CRL4|EVI27|IL17BR|IL17RH1|MGC5245	3	Cytokine_Receptors
IL17RC	84818	interleukin 17 receptor C	FLJ95963|FLJ96005|IL17-RL|IL17RL|MGC10763	3	Cytokine_Receptors
IL17RD	54756	interleukin 17 receptor D	DKFZp434N1928|FLJ35755|IL-17RD|IL17RLM|MGC133309|SEF	3	Cytokine_Receptors
IL17RE	132014	interleukin 17 receptor E	FLJ23658|MGC71884	3	Cytokine_Receptors
IL18R1	8809	interleukin 18 receptor 1	CD218a|CDw218a|IL-1Rrp|IL18RA|IL1RRP	2	Cytokine_Receptors
IL18RAP	8807	interleukin 18 receptor accessory protein	ACPL|CD218b|CDw218b|IL18RB|MGC120589|MGC120590	2	Cytokine_Receptors
IL1R1	3554	interleukin 1 receptor, type I	CD121A|D2S1473|IL-1R-alpha|IL1R|IL1RA|P80	2	Cytokine_Receptors
IL1R2	7850	interleukin 1 receptor, type II	CD121b|IL1RB|MGC47725	2	Cytokine_Receptors
IL1RAP	3556	interleukin 1 receptor accessory protein	C3orf13|FLJ37788|IL-1RAcP|IL1R3	3	Cytokine_Receptors
IL1RL1	9173	interleukin 1 receptor-like 1	DER4|FIT-1|MGC32623|ST2|ST2L|ST2V|T1	2	Cytokine_Receptors
IL1RL2	8808	interleukin 1 receptor-like 2	IL1R-rp2|IL1RRP2	2	Cytokine_Receptors
IL20RA	53832	interleukin 20 receptor, alpha	FLJ40993|IL-20R1|ZCYTOR7	6	Cytokine_Receptors
IL20RB	53833	interleukin 20 receptor beta	DIRS1|FNDC6|IL-20R2|MGC34923	3	Cytokine_Receptors
IL21R	50615	interleukin 21 receptor	MGC10967|NILR	16	Cytokine_Receptors
IL22RA1	58985	interleukin 22 receptor, alpha 1	CRF2-9|IL22R|IL22R1	1	Cytokine_Receptors
IL22RA2	116379	interleukin 22 receptor, alpha 2	CRF2-10|CRF2-S1|CRF2X|IL-22BP|MGC150509|MGC150510	6	Cytokine_Receptors
IL23R	149233	interleukin 23 receptor	-	1	Cytokine_Receptors
IL27RA	9466	interleukin 27 receptor, alpha	CRL1|IL27R|TCCR|WSX1|zcytor1	19	Cytokine_Receptors
IL28RA	163702	interleukin 28 receptor, alpha (interferon, lambda receptor)	CRF2/12|IFNLR|IFNLR1|IL-28R1|LICR2	1	Cytokine_Receptors
IL2RA	3559	interleukin 2 receptor, alpha	CD25|IDDM10|IL2R|TCGFR	10	Cytokine_Receptors
IL2RB	3560	interleukin 2 receptor, beta	CD122|P70-75	22	Cytokine_Receptors
IL2RG	3561	interleukin 2 receptor, gamma (severe combined immunodeficiency)	CD132|IMD4|SCIDX|SCIDX1	X	Cytokine_Receptors
IL31RA	133396	interleukin 31 receptor A	CRL|CRL3|GLM-R|GLMR|GPL|IL-31RA|MGC125346|PRO21384	5	Cytokine_Receptors
IL3RA	3563	interleukin 3 receptor, alpha (low affinity)	CD123|IL3R|IL3RAY|IL3RX|IL3RY|MGC34174|hIL-3Ra	X|Y	Cytokine_Receptors
IL4R	3566	interleukin 4 receptor	CD124|IL4RA	16	Cytokine_Receptors
IL5RA	3568	interleukin 5 receptor, alpha	CD125|CDw125|HSIL5R3|IL5R|MGC26560	3	Cytokine_Receptors
IL6R	3570	interleukin 6 receptor	CD126|IL-6R-1|IL-6R-alpha|IL6RA|MGC104991	1	Cytokine_Receptors
IL7R	3575	interleukin 7 receptor	CD127|CDW127|IL-7R-alpha|IL7RA|ILRA	5	Cytokine_Receptors
IL8RA	3577	interleukin 8 receptor, alpha	C-C|C-C-CKR-1|CD128|CD181|CDw128a|CKR-1|CMKAR1|CXCR1|IL8R1|IL8RBA	2	Cytokine_Receptors
IL8RB	3579	interleukin 8 receptor, beta	CD182|CDw128b|CMKAR2|CXCR2|IL8R2|IL8RA	2	Cytokine_Receptors
IL9R	3581	interleukin 9 receptor	CD129	X|Y	Cytokine_Receptors
INSR	3643	insulin receptor	CD220|HHF5	19	Cytokine_Receptors
KDR	3791	kinase insert domain receptor (a type III receptor tyrosine kinase)	CD309|FLK1|VEGFR|VEGFR2	4	Cytokine_Receptors
LEPR	3953	leptin receptor	CD295|OBR	1	Cytokine_Receptors
LGR4	55366	leucine-rich repeat-containing G protein-coupled receptor 4	GPR48	11	Cytokine_Receptors
LGR5	8549	leucine-rich repeat-containing G protein-coupled receptor 5	FEX|GPR49|GPR67|GRP49|HG38|MGC117008	12	Cytokine_Receptors
LGR6	59352	leucine-rich repeat-containing G protein-coupled receptor 6	FLJ14471|GPCR|VTS20631	1	Cytokine_Receptors
LHCGR	3973	luteinizing hormone/choriogonadotropin receptor	FLJ41504|LCGR|LGR2|LH/CG-R|LH/CGR|LHR|LHRHR|LSH-R	2	Cytokine_Receptors
LIFR	3977	leukemia inhibitory factor receptor alpha	CD118|FLJ98106|FLJ99923|LIF-R|SJS2|STWS|SWS	5	Cytokine_Receptors
LTB4R	1241	leukotriene B4 receptor	BLT1|BLTR|CMKRL1|GPR16|LTB4R1|LTBR1|P2RY7|P2Y7	14	Cytokine_Receptors
LTB4R2	56413	leukotriene B4 receptor 2	BLT2|BLTR2|JULF2|KPG_004|NOP9	14	Cytokine_Receptors
LTBR	4055	lymphotoxin beta receptor (TNFR superfamily, member 3)	CD18|D12S370|LT-BETA-R|TNF-R-III|TNFCR|TNFR-RP|TNFR2-RP|TNFRSF3	12	Cytokine_Receptors
MC1R	4157	melanocortin 1 receptor (alpha melanocyte stimulating hormone receptor)	MGC14337|MSH-R|SHEP2	16	Cytokine_Receptors
MC2R	4158	melanocortin 2 receptor (adrenocorticotropic hormone)	ACTHR|MGC125798	18	Cytokine_Receptors
MC3R	4159	melanocortin 3 receptor	BMIQ9|MC3|MC3-R|OB20|OQTL	20	Cytokine_Receptors
MC4R	4160	melanocortin 4 receptor	MGC126851|MGC138197	18	Cytokine_Receptors
MCHR1	2847	melanin-concentrating hormone receptor 1	GPR24|MCH1R|MGC32129|SLC1	22	Cytokine_Receptors
MCHR2	84539	melanin-concentrating hormone receptor 2	GPR145|MCH2|MCH2R|SLT	6	Cytokine_Receptors
MET	4233	met proto-oncogene (hepatocyte growth factor receptor)	AUTS9|HGFR|RCCP2|c-Met	7	Cytokine_Receptors
MLNR	2862	motilin receptor	GPR38|MTLR1	13	Cytokine_Receptors
MPL	4352	myeloproliferative leukemia virus oncogene	C-MPL|CD110|MPLV|TPOR	1	Cytokine_Receptors
MTNR1A	4543	melatonin receptor 1A	MEL-1A-R|MT1	4	Cytokine_Receptors
MTNR1B	4544	melatonin receptor 1B	MEL-1B-R|MT2	11	Cytokine_Receptors
NGFR	4804	nerve growth factor receptor (TNFR superfamily, member 16)	CD271|Gp80-LNGFR|TNFRSF16|p75(NTR)|p75NTR	17	Cytokine_Receptors
NMBR	4829	neuromedin B receptor	-	6	Cytokine_Receptors
NPR1	4881	natriuretic peptide receptor A/guanylate cyclase A (atrionatriuretic peptide receptor A)	ANPRA|ANPa|GUC2A|GUCY2A|NPRA	1	Cytokine_Receptors
NPR3	4883	natriuretic peptide receptor C/guanylate cyclase C (atrionatriuretic peptide receptor C)	ANPRC|GUCY2B|NPRC	5	Cytokine_Receptors
NR0B1	190	nuclear receptor subfamily 0, group B, member 1	AHC|AHCH|AHX|DAX-1|DAX1|DSS|GTD|HHG|NROB1	X	Cytokine_Receptors
NR0B2	8431	nuclear receptor subfamily 0, group B, member 2	FLJ17090|SHP|SHP1	1	Cytokine_Receptors
NR1D1	9572	nuclear receptor subfamily 1, group D, member 1	EAR1|THRA1|THRAL|ear-1|hRev	17	Cytokine_Receptors
NR1D2	9975	nuclear receptor subfamily 1, group D, member 2	BD73|EAR-1R|RVR	3	Cytokine_Receptors
NR1H2	7376	nuclear receptor subfamily 1, group H, member 2	LXR-b|LXRB|NER|NER-I|RIP15|UNR	19	Cytokine_Receptors
NR1H3	10062	nuclear receptor subfamily 1, group H, member 3	LXR-a|LXRA|RLD-1	11	Cytokine_Receptors
NR1H4	9971	nuclear receptor subfamily 1, group H, member 4	BAR|FXR|HRR-1|HRR1|MGC163445|RIP14	12	Cytokine_Receptors
NR1I2	8856	nuclear receptor subfamily 1, group I, member 2	BXR|ONR1|PAR|PAR1|PAR2|PARq|PRR|PXR|SAR|SXR	3	Cytokine_Receptors
NR1I3	9970	nuclear receptor subfamily 1, group I, member 3	CAR|CAR1|MB67|MGC150433|MGC97144|MGC97209	1	Cytokine_Receptors
NR2C1	7181	nuclear receptor subfamily 2, group C, member 1	TR2	12	Cytokine_Receptors
NR2C2	7182	nuclear receptor subfamily 2, group C, member 2	TAK1|TR2R1|TR4|hTAK1	3	Cytokine_Receptors
NR2E1	7101	nuclear receptor subfamily 2, group E, member 1	TLL|TLX|XTLL	6	Cytokine_Receptors
NR2E3	10002	nuclear receptor subfamily 2, group E, member 3	ESCS|MGC49976|PNR|RNR|RP37|rd7	15	Cytokine_Receptors
NR2F1	7025	nuclear receptor subfamily 2, group F, member 1	COUP-TFI|EAR-3|EAR3|ERBAL3|NR2F2|SVP44|TCFCOUP1|TFCOUP1	5	Cytokine_Receptors
NR2F2	7026	nuclear receptor subfamily 2, group F, member 2	ARP1|COUP-TFII|COUPTFB|MGC117452|SVP40|TFCOUP2	15	Cytokine_Receptors
NR2F6	2063	nuclear receptor subfamily 2, group F, member 6	EAR-2|EAR2|ERBAL2	19	Cytokine_Receptors
NR3C1	2908	nuclear receptor subfamily 3, group C, member 1 (glucocorticoid receptor)	GCCR|GCR|GR|GRL	5	Cytokine_Receptors
NR3C2	4306	nuclear receptor subfamily 3, group C, member 2	MCR|MGC133092|MLR|MR	4	Cytokine_Receptors
NR4A1	3164	nuclear receptor subfamily 4, group A, member 1	GFRP1|HMR|MGC9485|N10|NAK-1|NGFIB|NP10|NUR77|TR3	12	Cytokine_Receptors
NR4A2	4929	nuclear receptor subfamily 4, group A, member 2	HZF-3|NOT|NURR1|RNR1|TINUR	2	Cytokine_Receptors
NR4A3	8013	nuclear receptor subfamily 4, group A, member 3	CHN|CSMF|MINOR|NOR1|TEC	9	Cytokine_Receptors
NR5A1	2516	nuclear receptor subfamily 5, group A, member 1	AD4BP|ELP|FTZ1|FTZF1|SF-1|SF1	9	Cytokine_Receptors
NR5A2	2494	nuclear receptor subfamily 5, group A, member 2	B1F|B1F2|CPF|FTF|FTZ-F1|FTZ-F1beta|LRH-1|hB1F|hB1F-2	1	Cytokine_Receptors
NR6A1	2649	nuclear receptor subfamily 6, group A, member 1	GCNF|GCNF1|NR61|RTR	9	Cytokine_Receptors
NRP1	8829	neuropilin 1	BDCA4|CD304|DKFZp686A03134|DKFZp781F1414|NP1|NRP|VEGF165R	10	Cytokine_Receptors
NRP2	8828	neuropilin 2	MGC126574|NP2|NPN2|PRO2714|VEGF165R2	2	Cytokine_Receptors
OGFR	11054	opioid growth factor receptor	-	20	Cytokine_Receptors
OPRD1	4985	opioid receptor, delta 1	OPRD	1	Cytokine_Receptors
OPRK1	4986	opioid receptor, kappa 1	KOR|OPRK	8	Cytokine_Receptors
OPRL1	4987	opiate receptor-like 1	KOR-3|MGC34578|NOCIR|OOR|ORL1	20	Cytokine_Receptors
OPRM1	4988	opioid receptor, mu 1	KIAA0403|LMOR|MOR|MOR1|OPRM	6	Cytokine_Receptors
OSMR	9180	oncostatin M receptor	MGC150626|MGC150627|MGC75127|OSMRB	5	Cytokine_Receptors
OXTR	5021	oxytocin receptor	OT-R	3	Cytokine_Receptors
PGR	5241	progesterone receptor	NR3C3|PR	11	Cytokine_Receptors
PGRMC2	10424	progesterone receptor membrane component 2	DG6|PMBP	4	Cytokine_Receptors
PLAUR	5329	plasminogen activator, urokinase receptor	CD87|UPAR|URKR	19	Cytokine_Receptors
PLXNA1	5361	plexin A1	NOV|NOVP|PLEXIN-A1|PLXN1	3	Cytokine_Receptors
PLXNA2	5362	plexin A2	FLJ11751|FLJ30634|KIAA0463|OCT|PLXN2	1	Cytokine_Receptors
PLXNA3	55558	plexin A3	6.3|HSSEXGENE|PLEXIN-A3|PLXN3|PLXN4|SEX|XAP-6	X	Cytokine_Receptors
PLXNA4	91584	plexin A4	DKFZp434G0625|DKFZp566O0546|FAYV2820|FLJ35026|FLJ38287|KIAA1550|PLEXA4|PLXNA4A|PLXNA4B|PRO34003	7	Cytokine_Receptors
PLXNB1	5364	plexin B1	KIAA0407|MGC149167|PLEXIN-B1|PLXN5|SEP	3	Cytokine_Receptors
PLXNB2	23654	plexin B2	KIAA0315|MM1|Nbla00445|PLEXB2|dJ402G11.3	22	Cytokine_Receptors
PLXNB3	5365	plexin B3	FLJ76953|PLEXB3|PLEXR|PLXN6	X	Cytokine_Receptors
PLXNC1	10154	plexin C1	CD232|PLXN-C1|VESPR	12	Cytokine_Receptors
PLXND1	23129	plexin D1	KIAA0620|MGC75353|PLEXD1	3	Cytokine_Receptors
PPARA	5465	peroxisome proliferator-activated receptor alpha	MGC2237|MGC2452|NR1C1|PPAR|hPPAR	22	Cytokine_Receptors
PPARD	5467	peroxisome proliferator-activated receptor delta	FAAR|MGC3931|NR1C2|NUC1|NUCI|NUCII|PPAR-beta|PPARB	6	Cytokine_Receptors
PPARG	5468	peroxisome proliferator-activated receptor gamma	CIMT1|NR1C3|PPARG1|PPARG2|PPARgamma	3	Cytokine_Receptors
PRLHR	2834	prolactin releasing hormone receptor	GPR10|GR3|MGC126539|MGC126541|PrRPR	10	Cytokine_Receptors
PRLR	5618	prolactin receptor	hPRLrI	5	Cytokine_Receptors
PTAFR	5724	platelet-activating factor receptor	PAFR	1	Cytokine_Receptors
PTGDR	5729	prostaglandin D2 receptor (DP)	AS1|ASRT1|DP|DP1|MGC49004	14	Cytokine_Receptors
PTGDS	5730	prostaglandin D2 synthase 21kDa (brain)	LPGDS|PDS|PGD2|PGDS|PGDS2	9	Cytokine_Receptors
PTGER1	5731	prostaglandin E receptor 1 (subtype EP1), 42kDa	EP1	19	Cytokine_Receptors
PTGER2	5732	prostaglandin E receptor 2 (subtype EP2), 53kDa	EP2	14	Cytokine_Receptors
PTGER3	5733	prostaglandin E receptor 3 (subtype EP3)	EP3|EP3-I|EP3-II|EP3-III|EP3-IV|EP3e|MGC141828|MGC141829|MGC27302	1	Cytokine_Receptors
PTGER4	5734	prostaglandin E receptor 4 (subtype EP4)	EP4|EP4R|MGC126583	5	Cytokine_Receptors
PTGFR	5737	prostaglandin F receptor (FP)	FP|MGC120498|MGC46203	1	Cytokine_Receptors
PTH1R	5745	parathyroid hormone 1 receptor	MGC138426|MGC138452|PFE|PTHR|PTHR1	3	Cytokine_Receptors
PTH2R	5746	parathyroid hormone 2 receptor	PTHR2	2	Cytokine_Receptors
RARA	5914	retinoic acid receptor, alpha	NR1B1|RAR	17	Cytokine_Receptors
RARB	5915	retinoic acid receptor, beta	HAP|NR1B2|RRB2	3	Cytokine_Receptors
RARG	5916	retinoic acid receptor, gamma	NR1B3|RARC	12	Cytokine_Receptors
ROBO1	6091	roundabout, axon guidance receptor, homolog 1 (Drosophila)	DUTT1|FLJ21882|MGC131599|MGC133277|SAX3	3	Cytokine_Receptors
ROBO2	6092	roundabout, axon guidance receptor, homolog 2 (Drosophila)	KIAA1568|SAX3	3	Cytokine_Receptors
ROBO3	64221	roundabout, axon guidance receptor, homolog 3 (Drosophila)	FLJ21044|HGPPS|HGPS|RBIG1|RIG1	11	Cytokine_Receptors
RORA	6095	RAR-related orphan receptor A	DKFZp686M2414|MGC119326|MGC119329|NR1F1|ROR1|ROR2|ROR3|RZR-ALPHA|RZRA	15	Cytokine_Receptors
RORB	6096	RAR-related orphan receptor B	NR1F2|ROR-BETA|RZR-BETA|RZRB|bA133M9.1	9	Cytokine_Receptors
RORC	6097	RAR-related orphan receptor C	MGC129539|NR1F3|RORG|RZR-GAMMA|RZRG|TOR	1	Cytokine_Receptors
RXFP1	59350	relaxin/insulin-like family peptide receptor 1	LGR7|LGR7.1|LGR7.10|LGR7.2|MGC138347|MGC142177|RXFPR1	4	Cytokine_Receptors
RXFP2	122042	relaxin/insulin-like family peptide receptor 2	GPR106|GREAT|INSL3R|LGR8|LGR8.1|RXFPR2	13	Cytokine_Receptors
RXFP3	51289	relaxin/insulin-like family peptide receptor 3	GPCR135|MGC141998|MGC142000|RLN3R1|RXFPR3|SALPR	5	Cytokine_Receptors
RXRA	6256	retinoid X receptor, alpha	FLJ00280|FLJ00318|FLJ16020|FLJ16733|MGC102720|NR2B1	9	Cytokine_Receptors
RXRB	6257	retinoid X receptor, beta	DAUDI6|H-2RIIBP|MGC1831|NR2B2|RCoR-1	6	Cytokine_Receptors
RXRG	6258	retinoid X receptor, gamma	NR2B3|RXRC	1	Cytokine_Receptors
S1PR1	1901	sphingosine-1-phosphate receptor 1	CHEDG1|D1S3362|ECGF1|EDG-1|EDG1|FLJ58121|S1P1	1	Cytokine_Receptors
S1PR2	9294	sphingosine-1-phosphate receptor 2	AGR16|EDG-5|EDG5|Gpcr13|H218|LPB2|S1P2	19	Cytokine_Receptors
SCTR	6344	secretin receptor	SR	2	Cytokine_Receptors
SDC1	6382	syndecan 1	CD138|SDC|SYND1|syndecan	2	Cytokine_Receptors
SDC2	6383	syndecan 2	HSPG|HSPG1|SYND2	8	Cytokine_Receptors
SDC3	9672	syndecan 3	N-syndecan|SDCN|SYND3	1	Cytokine_Receptors
SDC4	6385	syndecan 4	MGC22217|SYND4	20	Cytokine_Receptors
SORT1	6272	sortilin 1	Gp95|NT3	1	Cytokine_Receptors
SSTR1	6751	somatostatin receptor 1	SRIF-2	14	Cytokine_Receptors
SSTR2	6752	somatostatin receptor 2	-	17	Cytokine_Receptors
SSTR5	6755	somatostatin receptor 5	-	16	Cytokine_Receptors
ST2	6761	suppression of tumorigenicity 2	-	11	Cytokine_Receptors
TACR1	6869	tachykinin receptor 1	NK1R|NKIR|SPR|TAC1R	2	Cytokine_Receptors
TEK	7010	TEK tyrosine kinase, endothelial	CD202B|TIE-2|TIE2|VMCM|VMCM1	9	Cytokine_Receptors
TGFBR1	7046	transforming growth factor, beta receptor 1	AAT5|ACVRLK4|ALK-5|ALK5|LDS1A|LDS2A|SKR4|TGFR-1	9	Cytokine_Receptors
TGFBR2	7048	transforming growth factor, beta receptor II (70/80kDa)	AAT3|FAA3|LDS1B|LDS2B|MFS2|RIIC|TAAD2|TGFR-2|TGFbeta-RII	3	Cytokine_Receptors
TGFBR3	7049	transforming growth factor, beta receptor III	BGCAN|betaglycan	1	Cytokine_Receptors
THRA	7067	thyroid hormone receptor, alpha (erythroblastic leukemia viral (v-erb-a) oncogene homolog, avian)	AR7|EAR7|ERB-T-1|ERBA|ERBA1|MGC000261|MGC43240|NR1A1|THRA1|THRA2|c-ERBA-1	17	Cytokine_Receptors
THRB	7068	thyroid hormone receptor, beta (erythroblastic leukemia viral (v-erb-a) oncogene homolog 2, avian)	ERBA-BETA|ERBA2|GRTH|MGC126109|MGC126110|NR1A2|PRTH|THR1|THRB1|THRB2	3	Cytokine_Receptors
TIE1	7075	tyrosine kinase with immunoglobulin-like and EGF-like domains 1	JTK14|TIE	1	Cytokine_Receptors
TNFRSF10A	8797	tumor necrosis factor receptor superfamily, member 10a	APO2|CD261|DR4|MGC9365|TRAILR-1|TRAILR1	8	Cytokine_Receptors
TNFRSF10B	8795	tumor necrosis factor receptor superfamily, member 10b	CD262|DR5|KILLER|KILLER/DR5|TRAIL-R2|TRAILR2|TRICK2|TRICK2A|TRICK2B|TRICKB|ZTNFR9	8	Cytokine_Receptors
TNFRSF10C	8794	tumor necrosis factor receptor superfamily, member 10c, decoy without an intracellular domain	CD263|DCR1|LIT|MGC149501|MGC149502|TRAILR3|TRID	8	Cytokine_Receptors
TNFRSF10D	8793	tumor necrosis factor receptor superfamily, member 10d, decoy with truncated death domain	CD264|DCR2|TRAILR4|TRUNDD	8	Cytokine_Receptors
TNFRSF11A	8792	tumor necrosis factor receptor superfamily, member 11a, NFKB activator	CD265|FEO|LOH18CR1|ODFR|OFE|OPTB7|OSTS|PDB2|RANK|TRANCER	18	Cytokine_Receptors
TNFRSF12A	51330	tumor necrosis factor receptor superfamily, member 12A	CD266|FN14|TWEAKR	16	Cytokine_Receptors
TNFRSF13B	23495	tumor necrosis factor receptor superfamily, member 13B	CD267|CVID|FLJ39942|MGC133214|MGC39952|TACI|TNFRSF14B	17	Cytokine_Receptors
TNFRSF13C	115650	tumor necrosis factor receptor superfamily, member 13C	BAFF-R|BAFFR|CD268|MGC138235	22	Cytokine_Receptors
TNFRSF14	8764	tumor necrosis factor receptor superfamily, member 14 (herpesvirus entry mediator)	ATAR|HVEA|HVEM|LIGHTR|TR2	1	Cytokine_Receptors
TNFRSF17	608	tumor necrosis factor receptor superfamily, member 17	BCM|BCMA|CD269	16	Cytokine_Receptors
TNFRSF18	8784	tumor necrosis factor receptor superfamily, member 18	AITR|GITR|GITR-D	1	Cytokine_Receptors
TNFRSF19	55504	tumor necrosis factor receptor superfamily, member 19	TAJ|TAJ-alpha|TRADE|TROY	13	Cytokine_Receptors
TNFRSF1A	7132	tumor necrosis factor receptor superfamily, member 1A	CD120a|FPF|MGC19588|TBP1|TNF-R|TNF-R-I|TNF-R55|TNFAR|TNFR1|TNFR55|TNFR60|p55|p55-R|p60	12	Cytokine_Receptors
TNFRSF1B	7133	tumor necrosis factor receptor superfamily, member 1B	CD120b|TBPII|TNF-R-II|TNF-R75|TNFBR|TNFR1B|TNFR2|TNFR80|p75|p75TNFR	1	Cytokine_Receptors
TNFRSF21	27242	tumor necrosis factor receptor superfamily, member 21	BM-018|DR6|MGC31965	6	Cytokine_Receptors
TNFRSF25	8718	tumor necrosis factor receptor superfamily, member 25	APO-3|DDR3|DR3|LARD|TNFRSF12|TR3|TRAMP|WSL-1|WSL-LR	1	Cytokine_Receptors
TNFRSF4	7293	tumor necrosis factor receptor superfamily, member 4	ACT35|CD134|OX40|TXGP1L	1	Cytokine_Receptors
TNFRSF6B	8771	tumor necrosis factor receptor superfamily, member 6b, decoy	DCR3|DJ583P15.1.1|M68|TR6	20	Cytokine_Receptors
TNFRSF8	943	tumor necrosis factor receptor superfamily, member 8	CD30|D1S166E|Ki-1	1	Cytokine_Receptors
TNFRSF9	3604	tumor necrosis factor receptor superfamily, member 9	4-1BB|CD137|CDw137|ILA|MGC2172	1	Cytokine_Receptors
TRHR	7201	thyrotropin-releasing hormone receptor	MGC141920	8	Cytokine_Receptors
TSHR	7253	thyroid stimulating hormone receptor	CHNG1|LGR3|MGC75129|hTSHR-I	14	Cytokine_Receptors
TUBB3	10381	tubulin, beta 3	MC1R|TUBB4|beta-4	16	Cytokine_Receptors
VDR	7421	vitamin D (1,25- dihydroxyvitamin D3) receptor	NR1I1	12	Cytokine_Receptors
VIPR1	7433	vasoactive intestinal peptide receptor 1	FLJ41949|HVR1|II|PACAP-R-2|RDC1|VAPC1|VIPR|VIRG|VPAC1|VPCAP1R	3	Cytokine_Receptors
VIPR2	7434	vasoactive intestinal peptide receptor 2	FLJ16511|VPAC2|VPCAP2R	7	Cytokine_Receptors
XCR1	2829	chemokine (C motif) receptor 1	CCXCR1|GPR5	3	Cytokine_Receptors
IFNA10	3446	interferon, alpha 10	MGC119878|MGC119879	9	Interferons
IFNA13	3447	interferon, alpha 13	-	9	Interferons
IFNA14	3448	interferon, alpha 14	LEIF2H|MGC125756|MGC125757	9	Interferons
IFNA16	3449	interferon, alpha 16	-	9	Interferons
IFNA17	3451	interferon, alpha 17	IFNA|INFA|LEIF2C1	9	Interferons
IFNA2	3440	interferon, alpha 2	IFNA|INFA2|MGC125764|MGC125765	9	Interferons
IFNA21	3452	interferon, alpha 21	MGC126687|MGC126689	9	Interferons
IFNA4	3441	interferon, alpha 4	INFA4|MGC142200	9	Interferons
IFNA5	3442	interferon, alpha 5	INFA5	9	Interferons
IFNA6	3443	interferon, alpha 6	-	9	Interferons
IFNA7	3444	interferon, alpha 7	IFNA-J	9	Interferons
IFNA8	3445	interferon, alpha 8	-	9	Interferons
IFNB1	3456	interferon, beta 1, fibroblast	IFB|IFF|IFNB|MGC96956	9	Interferons
IFNE	338376	interferon, epsilon	IFN-E|IFNE1|IFNT1|MGC119018|MGC119020|PRO655	9	Interferons
IFNG	3458	interferon, gamma	IFG|IFI	12	Interferons
IFNK	56832	interferon, kappa	RP11-27J8.1	9	Interferons
IFNW1	3467	interferon, omega 1	-	9	Interferons
IFNAR2	3455	interferon (alpha, beta and omega) receptor 2	IFN-R|IFN-alpha-REC|IFNABR|IFNARB	21	Interferon_Receptor
IFNGR1	3459	interferon gamma receptor 1	CD119|FLJ45734|IFNGR	6	Interferon_Receptor
IFNGR2	3460	interferon gamma receptor 2 (interferon gamma transducer 1)	AF-1|IFGR2|IFNGT1	21	Interferon_Receptor
IL11	3589	interleukin 11	AGIF|IL-11	19	Interleukins
IL12A	3592	interleukin 12A (natural killer cell stimulatory factor 1, cytotoxic lymphocyte maturation factor 1, p35)	CLMF|IL-12A|NFSK|NKSF1|P35	3	Interleukins
IL12B	3593	interleukin 12B (natural killer cell stimulatory factor 2, cytotoxic lymphocyte maturation factor 2, p40)	CLMF|CLMF2|IL-12B|NKSF|NKSF2	5	Interleukins
IL13	3596	interleukin 13	ALRH|BHR1|IL-13|MGC116786|MGC116788|MGC116789|P600	5	Interleukins
IL15	3600	interleukin 15	IL-15|MGC9721	4	Interleukins
IL16	3603	interleukin 16 (lymphocyte chemoattractant factor)	FLJ16806|FLJ42735|FLJ44234|HsT19289|IL-16|LCF|prIL-16	15	Interleukins
IL17A	3605	interleukin 17A	CTLA8|IL-17|IL-17A|IL17	6	Interleukins
IL17B	27190	interleukin 17B	IL-17B|IL-20|MGC138900|MGC138901|ZCYTO7	5	Interleukins
IL17C	27189	interleukin 17C	CX2|IL-17C|IL-21|MGC126884|MGC138401	16	Interleukins
IL17D	53342	interleukin 17D	FLJ30846|IL-17D|IL-22|IL-27|IL27	13	Interleukins
IL17F	112744	interleukin 17F	IL-17F|ML-1|ML1	6	Interleukins
IL18	3606	interleukin 18 (interferon-gamma-inducing factor)	IGIF|IL-18|IL-1g|IL1F4|MGC12320	11	Interleukins
IL19	29949	interleukin 19	IL-10C|MDA1|NG.1|ZMDA1	1	Interleukins
IL1A	3552	interleukin 1, alpha	IL-1A|IL1|IL1-ALPHA|IL1F1	2	Interleukins
IL1B	3553	interleukin 1, beta	IL-1|IL1-BETA|IL1F2	2	Interleukins
IL1F10	84639	interleukin 1 family, member 10 (theta)	FIL1-theta|FKSG75|IL-1HY2|IL1-theta|MGC119831|MGC119832|MGC119833	2	Interleukins
IL1F5	26525	interleukin 1 family, member 5 (delta)	FIL1|FIL1(DELTA)|FIL1D|IL1HY1|IL1L1|IL1RP3|MGC29840	2	Interleukins
IL1F6	27179	interleukin 1 family, member 6 (epsilon)	FIL1|FIL1(EPSILON)|FIL1E|IL-1F6|IL1(EPSILON)|MGC129552|MGC129553	2	Interleukins
IL1F7	27178	interleukin 1 family, member 7 (zeta)	FIL1|FIL1(ZETA)|FIL1Z|IL-1F7|IL-1H4|IL-1RP1|IL1H4|IL1RP1	2	Interleukins
IL1F8	27177	interleukin 1 family, member 8 (eta)	FIL1|FIL1-(ETA)|FIL1H|IL-1F8|IL-1H2|IL1-ETA|IL1H2|MGC126880|MGC126882	2	Interleukins
IL1F9	56300	interleukin 1 family, member 9	IL-1F9|IL-1H1|IL-1RP2|IL1E|IL1H1|IL1RP2	2	Interleukins
IL1RN	3557	interleukin 1 receptor antagonist	ICIL-1RA|IL-1ra3|IL1F3|IL1RA|IRAP|MGC10430	2	Interleukins
IL2	3558	interleukin 2	IL-2|TCGF|lymphokine	4	Interleukins
IL20	50604	interleukin 20	IL-20|IL10D|MGC96907|ZCYTO10	1	Interleukins
IL21	59067	interleukin 21	IL-21|Za11	4	Interleukins
IL22	50616	interleukin 22	IL-21|IL-22|IL-D110|IL-TIF|IL21|ILTIF|MGC79382|MGC79384|TIFIL-23|TIFa|zcyto18	12	Interleukins
IL23A	51561	interleukin 23, alpha subunit p19	IL-23|IL-23A|IL23P19|MGC79388|P19|SGRF	12	Interleukins
IL24	11009	interleukin 24	C49A|FISP|IL-24|IL10B|MDA7|Mob-5|ST16|mda-7	1	Interleukins
IL25	64806	interleukin 25	IL-17E|IL-25|IL17E	14	Interleukins
IL26	55801	interleukin 26	AK155|IL-26	12	Interleukins
IL27	246778	interleukin 27	IL-27|IL-27A|IL27p28|IL30|MGC71873|p28	16	Interleukins
IL28A	282616	interleukin 28A (interferon, lambda 2)	IFNL2|IL-28A	19	Interleukins
IL28B	282617	interleukin 28B (interferon, lambda 3)	IFNL3|IL-28B|IL28C	19	Interleukins
IL29	282618	interleukin 29 (interferon, lambda 1)	IFNL1|IL-29	19	Interleukins
IL3	3562	interleukin 3 (colony-stimulating factor, multiple)	IL-3|MCGF|MGC79398|MGC79399|MULTI-CSF	5	Interleukins
IL31	386653	interleukin 31	IL-31	12	Interleukins
IL32	9235	interleukin 32	IL-32alpha|IL-32beta|IL-32delta|IL-32gamma|NK4|TAIF|TAIFa|TAIFb|TAIFc|TAIFd	16	Interleukins
IL33	90865	interleukin 33	C9orf26|DKFZp586H0523|DVS27|NF-HEV|NFEHEV|RP11-575C20.2	9	Interleukins
IL34	146433	interleukin 34	C16orf77|IL-34|MGC34647	16	Interleukins
IL4	3565	interleukin 4	BCGF-1|BCGF1|BSF1|IL-4|MGC79402	5	Interleukins
IL5	3567	interleukin 5 (colony-stimulating factor, eosinophil)	EDF|IL-5|TRF	5	Interleukins
IL6	3569	interleukin 6 (interferon, beta 2)	BSF2|HGF|HSF|IFNB2|IL-6	7	Interleukins
IL6ST	3572	interleukin 6 signal transducer (gp130, oncostatin M receptor)	CD130|CDw130|GP130|GP130-RAPS|IL6R-beta	5	Interleukins
IL7	3574	interleukin 7	IL-7	8	Interleukins
IL8	3576	interleukin 8	CXCL8|GCP-1|GCP1|LECT|LUCT|LYNAP|MDNCF|MONAP|NAF|NAP-1|NAP1	4	Interleukins
IL9	3578	interleukin 9	HP40|IL-9|P40	5	Interleukins
TXLNA	200081	taxilin alpha	DKFZp451J0118|IL14|MGC118870|MGC118871|RP4-622L5.4|TXLN	1	Interleukins
IL10RA	3587	interleukin 10 receptor, alpha	CDW210A|HIL-10R|IL-10R1|IL10R	11	Interleukins_Receptor
IL10RB	3588	interleukin 10 receptor, beta	CDW210B|CRF2-4|CRFB4|D21S58|D21S66|IL-10R2	21	Interleukins_Receptor
IL11RA	3590	interleukin 11 receptor, alpha	MGC2146	9	Interleukins_Receptor
IL11RB	3591	interleukin 11 receptor, beta	-	-	Interleukins_Receptor
IL12RB1	3594	interleukin 12 receptor, beta 1	CD212|IL-12R-BETA1|IL12RB|MGC34454	19	Interleukins_Receptor
IL12RB2	3595	interleukin 12 receptor, beta 2	-	1	Interleukins_Receptor
IL13RA1	3597	interleukin 13 receptor, alpha 1	CD213A1|IL-13Ra|NR4	X	Interleukins_Receptor
IL13RA2	3598	interleukin 13 receptor, alpha 2	CD213A2|CT19|IL-13R|IL13BP	X	Interleukins_Receptor
IL15RA	3601	interleukin 15 receptor, alpha	MGC104179	10	Interleukins_Receptor
IL15RB	3602	interleukin 15 receptor, beta	-	-	Interleukins_Receptor
IL17RA	23765	interleukin 17 receptor A	CD217|CDw217|IL-17RA|IL17R|MGC10262|hIL-17R	22	Interleukins_Receptor
IL17RB	55540	interleukin 17 receptor B	CRL4|EVI27|IL17BR|IL17RH1|MGC5245	3	Interleukins_Receptor
IL17RC	84818	interleukin 17 receptor C	FLJ95963|FLJ96005|IL17-RL|IL17RL|MGC10763	3	Interleukins_Receptor
IL17RD	54756	interleukin 17 receptor D	DKFZp434N1928|FLJ35755|IL-17RD|IL17RLM|MGC133309|SEF	3	Interleukins_Receptor
IL17RE	132014	interleukin 17 receptor E	FLJ23658|MGC71884	3	Interleukins_Receptor
IL18R1	8809	interleukin 18 receptor 1	CD218a|CDw218a|IL-1Rrp|IL18RA|IL1RRP	2	Interleukins_Receptor
IL18RAP	8807	interleukin 18 receptor accessory protein	ACPL|CD218b|CDw218b|IL18RB|MGC120589|MGC120590	2	Interleukins_Receptor
IL1R1	3554	interleukin 1 receptor, type I	CD121A|D2S1473|IL-1R-alpha|IL1R|IL1RA|P80	2	Interleukins_Receptor
IL1R2	7850	interleukin 1 receptor, type II	CD121b|IL1RB|MGC47725	2	Interleukins_Receptor
IL1RAP	3556	interleukin 1 receptor accessory protein	C3orf13|FLJ37788|IL-1RAcP|IL1R3	3	Interleukins_Receptor
IL1RL1	9173	interleukin 1 receptor-like 1	DER4|FIT-1|MGC32623|ST2|ST2L|ST2V|T1	2	Interleukins_Receptor
IL1RL2	8808	interleukin 1 receptor-like 2	IL1R-rp2|IL1RRP2	2	Interleukins_Receptor
IL20RA	53832	interleukin 20 receptor, alpha	FLJ40993|IL-20R1|ZCYTOR7	6	Interleukins_Receptor
IL20RB	53833	interleukin 20 receptor beta	DIRS1|FNDC6|IL-20R2|MGC34923	3	Interleukins_Receptor
IL21R	50615	interleukin 21 receptor	MGC10967|NILR	16	Interleukins_Receptor
IL22RA1	58985	interleukin 22 receptor, alpha 1	CRF2-9|IL22R|IL22R1	1	Interleukins_Receptor
IL22RA2	116379	interleukin 22 receptor, alpha 2	CRF2-10|CRF2-S1|CRF2X|IL-22BP|MGC150509|MGC150510	6	Interleukins_Receptor
IL23R	149233	interleukin 23 receptor	-	1	Interleukins_Receptor
IL27RA	9466	interleukin 27 receptor, alpha	CRL1|IL27R|TCCR|WSX1|zcytor1	19	Interleukins_Receptor
IL28RA	163702	interleukin 28 receptor, alpha (interferon, lambda receptor)	CRF2/12|IFNLR|IFNLR1|IL-28R1|LICR2	1	Interleukins_Receptor
IL2RA	3559	interleukin 2 receptor, alpha	CD25|IDDM10|IL2R|TCGFR	10	Interleukins_Receptor
IL2RB	3560	interleukin 2 receptor, beta	CD122|P70-75	22	Interleukins_Receptor
IL2RG	3561	interleukin 2 receptor, gamma (severe combined immunodeficiency)	CD132|IMD4|SCIDX|SCIDX1	X	Interleukins_Receptor
IL31RA	133396	interleukin 31 receptor A	CRL|CRL3|GLM-R|GLMR|GPL|IL-31RA|MGC125346|PRO21384	5	Interleukins_Receptor
IL3RA	3563	interleukin 3 receptor, alpha (low affinity)	CD123|IL3R|IL3RAY|IL3RX|IL3RY|MGC34174|hIL-3Ra	X|Y	Interleukins_Receptor
IL4R	3566	interleukin 4 receptor	CD124|IL4RA	16	Interleukins_Receptor
IL5RA	3568	interleukin 5 receptor, alpha	CD125|CDw125|HSIL5R3|IL5R|MGC26560	3	Interleukins_Receptor
IL6R	3570	interleukin 6 receptor	CD126|IL-6R-1|IL-6R-alpha|IL6RA|MGC104991	1	Interleukins_Receptor
IL7R	3575	interleukin 7 receptor	CD127|CDW127|IL-7R-alpha|IL7RA|ILRA	5	Interleukins_Receptor
IL8RA	3577	interleukin 8 receptor, alpha	C-C|C-C-CKR-1|CD128|CD181|CDw128a|CKR-1|CMKAR1|CXCR1|IL8R1|IL8RBA	2	Interleukins_Receptor
IL8RB	3579	interleukin 8 receptor, beta	CD182|CDw128b|CMKAR2|CXCR2|IL8R2|IL8RA	2	Interleukins_Receptor
IL9R	3581	interleukin 9 receptor	CD129	X|Y	Interleukins_Receptor
ST2	6761	suppression of tumorigenicity 2	-	11	Interleukins_Receptor
HLA-A	3105	major histocompatibility complex, class I, A	FLJ26655|HLAA	6	NaturalKiller_Cell_Cytotoxicity
HLA-B	3106	major histocompatibility complex, class I, B	AS|HLA-B-7301|HLA-B73|HLAB|HLAC|MGC111087|SPDA1	6	NaturalKiller_Cell_Cytotoxicity
HLA-C	3107	major histocompatibility complex, class I, C	D6S204|FLJ27082|HLA-Cw|HLA-Cw12|HLA-JY3|HLC-C|PSORS1	6	NaturalKiller_Cell_Cytotoxicity
[truncated: 499 more rows]

## Sheet: Table 5
Table S5
List of immune related genes mapped on chromosome 1p and 19q
Gene Symbol	Chromosome	Cytogenetic band	Immune Category
NFYC	1	1p34.2	Antigen_Processing_and_Presentation
PSMC4	19	19q13.11-q13.13	Antigen_Processing_and_Presentation
PSMD8	19	19q13.2	Antigen_Processing_and_Presentation
RELB	19	19q13.32	Antigen_Processing_and_Presentation
FCGRT	19	19q13.33	Antigen_Processing_and_Presentation
KIR2DS3	19	19q13.4	Antigen_Processing_and_Presentation
KIR2DL5A	19	19q13.4	Antigen_Processing_and_Presentation
KIR2DL2	19	19q13.4	Antigen_Processing_and_Presentation
KIR2DS1	19	19q13.4	Antigen_Processing_and_Presentation
KIR2DS5	19	19q13.4	Antigen_Processing_and_Presentation
KIR2DL3	19	19q13.42	Antigen_Processing_and_Presentation
KIR2DL4	19	19q13.42	Antigen_Processing_and_Presentation
KIR2DS4	19	19q13.42	Antigen_Processing_and_Presentation
KIR3DL3	19	19q13.42	Antigen_Processing_and_Presentation
KIR2DL1	19	19q13.42	Antigen_Processing_and_Presentation
KIR3DL1	19	19q13.42	Antigen_Processing_and_Presentation
KIR3DL2	19	19q13.42	Antigen_Processing_and_Presentation
FABP3	1	1p35.2	Antimicrobials
FAM19A3	1	1p13.2	Antimicrobials
FGR	1	1p35.3	Antimicrobials
GBP2	1	1p22.2	Antimicrobials
HDAC1	1	1p35.2	Antimicrobials
IL28RA	1	1p36.11	Antimicrobials
ISG15	1	1p36.33	Antimicrobials
JAK1	1	1p31.3	Antimicrobials
JUN	1	1p32.1	Antimicrobials
MASP2	1	1p36.22	Antimicrobials
PLA2G2A	1	1p36.13	Antimicrobials
PRDX1	1	1p34.1	Antimicrobials
RBP7	1	1p36.22	Antimicrobials
SYTL1	1	1p36.11	Antimicrobials
TINAGL1	1	1p35.2	Antimicrobials
VCAM1	1	1p21.2	Antimicrobials
HAMP	19	19q13.12	Antimicrobials
TGFB1	19	19q13.2	Antimicrobials
IL29	19	19q13.2	Antimicrobials
IL28A	19	19q13.2	Antimicrobials
PGLYRP1	19	19q13.32	Antimicrobials
BCL3	19	19q13.32	Antimicrobials
IRF3	19	19q13.33	Antimicrobials
BCL10	1	1p22.3	BCRSignalingPathway
JUN	1	1p32.1	BCRSignalingPathway
NRAS	1	1p13.2	BCRSignalingPathway
PIK3CD	1	1p36.22	BCRSignalingPathway
PIK3R3	1	1p34.1	BCRSignalingPathway
VAV3	1	1p13.3	BCRSignalingPathway
CD22	19	19q13.12	BCRSignalingPathway
CD79A	19	19q13.2	BCRSignalingPathway
NFKBIB	19	19q13.2	BCRSignalingPathway
AKT2	19	19q13.2	BCRSignalingPathway
LILRB3	19	19q13.42	BCRSignalingPathway
PTAFR	1	1p35.3	Chemokine_Receptors
PLAUR	19	19q13	Chemokine_Receptors
C5AR1	19	19q13.32	Chemokine_Receptors
GPR77	19	19q13.32	Chemokine_Receptors
GPR32	19	19q13.33	Chemokine_Receptors
FPR1	19	19q13.41	Chemokine_Receptors
FPR2	19	19q13.41	Chemokine_Receptors
CYR61	1	1p22.3	Chemokines
EDN2	1	1p34.2	Chemokines
CXCL17	19	19q13.2	Chemokines
ANGPTL3	1	1p31.3	Cytokine_Receptors
CSF3R	1	1p34.3	Cytokine_Receptors
IL12RB2	1	1p31.3	Cytokine_Receptors
IL22RA1	1	1p36.11	Cytokine_Receptors
IL23R	1	1p31.3	Cytokine_Receptors
IL28RA	1	1p36.11	Cytokine_Receptors
LEPR	1	1p31.3	Cytokine_Receptors
MPL	1	1p34.2	Cytokine_Receptors
NR0B2	1	1p36.11	Cytokine_Receptors
OPRD1	1	1p35.3	Cytokine_Receptors
PTAFR	1	1p35.3	Cytokine_Receptors
PTGER3	1	1p31.1	Cytokine_Receptors
PTGFR	1	1p31.1	Cytokine_Receptors
S1PR1	1	1p21.2	Cytokine_Receptors
SDC3	1	1p35.2	Cytokine_Receptors
SORT1	1	1p13.3	Cytokine_Receptors
TGFBR3	1	1p22.1	Cytokine_Receptors
TIE1	1	1p34.2	Cytokine_Receptors
TNFRSF14	1	1p36.32	Cytokine_Receptors
TNFRSF18	1	1p36.33	Cytokine_Receptors
TNFRSF1B	1	1p36.22	Cytokine_Receptors
TNFRSF25	1	1p36.31	Cytokine_Receptors
TNFRSF4	1	1p36.33	Cytokine_Receptors
TNFRSF8	1	1p36.22	Cytokine_Receptors
TNFRSF9	1	1p36.23	Cytokine_Receptors
PLAUR	19	19q13	Cytokine_Receptors
NR1H2	19	19q13.3	Cytokine_Receptors
C5AR1	19	19q13.32	Cytokine_Receptors
GIPR	19	19q13.32	Cytokine_Receptors
GPR77	19	19q13.32	Cytokine_Receptors
GPR32	19	19q13.33	Cytokine_Receptors
FPR1	19	19q13.41	Cytokine_Receptors
FPR2	19	19q13.41	Cytokine_Receptors
FPR2	19	19q13.41	Cytokine_Receptors
ANGPTL7	1	1p36.22	Cytokines
ARTN	1	1p34.1	Cytokines
BMP8A	1	1p34.3	Cytokines
BMP8B	1	1p34.2	Cytokines
CORT	1	1p36.22	Cytokines
CSF1	1	1p13.3	Cytokines
CYR61	1	1p22.3	Cytokines
EDN2	1	1p34.2	Cytokines
GUCA2A	1	1p34.2	Cytokines
INSL5	1	1p31.3	Cytokines
NGF	1	1p13.2	Cytokines
NPPA	1	1p36.22	Cytokines
NPPB	1	1p36.22	Cytokines
PROK1	1	1p13.3	Cytokines
TSHB	1	1p13.2	Cytokines
TXLNA	1	1p35.2	Cytokines
UTS2	1	1p36.23	Cytokines
GPI	19	19q13.11	Cytokines
HAMP	19	19q13.12	Cytokines
CXCL17	19	19q13.2	Cytokines
GMFG	19	19q13.2	Cytokines
IL28A	19	19q13.2	Cytokines
IL28B	19	19q13.2	Cytokines
IL29	19	19q13.2	Cytokines
LTBP4	19	19q13.2	Cytokines
MIA	19	19q13.2	Cytokines
TGFB1	19	19q13.2	Cytokines
CGB	19	19q13.33	Cytokines
CGB1	19	19q13.33	Cytokines
CGB2	19	19q13.33	Cytokines
CGB5	19	19q13.33	Cytokines
CGB7	19	19q13.33	Cytokines
CGB8	19	19q13.33	Cytokines
CLEC11A	19	19q13.33	Cytokines
FGF21	19	19q13.33	Cytokines
FLT3LG	19	19q13.33	Cytokines
LHB	19	19q13.33	Cytokines
NTF4	19	19q13.33	Cytokines
PTH2	19	19q13.33	Cytokines
IL11	19	19q13.42	Cytokines
GALP	19	19q13.43	Cytokines
TXLNA	1	1p35.2	Interleukins
IL28A	19	19q13.2	Interleukins
IL28B	19	19q13.2	Interleukins
IL29	19	19q13.2	Interleukins
IL11	19	19q13.42	Interleukins
IL12RB2	1	1p31.3	Interleukins_Receptor
IL22RA1	1	1p36.11	Interleukins_Receptor
IL23R	1	1p31.3	Interleukins_Receptor
IL28RA	1	1p36.11	Interleukins_Receptor
LCK	1	1p35.2	NaturalKiller_Cell_Cytotoxicity
NRAS	1	1p13.2	NaturalKiller_Cell_Cytotoxicity
PIK3CD	1	1p36.22	NaturalKiller_Cell_Cytotoxicity
PIK3R3	1	1p34.1	NaturalKiller_Cell_Cytotoxicity
VAV3	1	1p13.3	NaturalKiller_Cell_Cytotoxicity
TYROBP	19	19q13.12	NaturalKiller_Cell_Cytotoxicity
HCST	19	19q13.12	NaturalKiller_Cell_Cytotoxicity
KIR2DL2	19	19q13.4	NaturalKiller_Cell_Cytotoxicity
KIR2DL5A	19	19q13.4	NaturalKiller_Cell_Cytotoxicity
KIR2DS1	19	19q13.4	NaturalKiller_Cell_Cytotoxicity
KIR2DS3	19	19q13.4	NaturalKiller_Cell_Cytotoxicity
KIR2DS5	19	19q13.4	NaturalKiller_Cell_Cytotoxicity
KIR3DL1	19	19q13.42	NaturalKiller_Cell_Cytotoxicity
KIR3DL2	19	19q13.42	NaturalKiller_Cell_Cytotoxicity
KIR2DL1	19	19q13.42	NaturalKiller_Cell_Cytotoxicity
KIR2DL3	19	19q13.42	NaturalKiller_Cell_Cytotoxicity
KIR2DL4	19	19q13.42	NaturalKiller_Cell_Cytotoxicity
KIR2DS4	19	19q13.42	NaturalKiller_Cell_Cytotoxicity
NCR1	19	19q13.42	NaturalKiller_Cell_Cytotoxicity
PRKCG	19	19q13.42	NaturalKiller_Cell_Cytotoxicity
BCL10	1	1p22.3	TCRsignalingPathway
CDC42	1	1p36.12	TCRsignalingPathway
JUN	1	1p32.1	TCRsignalingPathway
LCK	1	1p35.2	TCRsignalingPathway
NRAS	1	1p13.2	TCRsignalingPathway
PIK3CD	1	1p36.22	TCRsignalingPathway
PIK3R3	1	1p34.1	TCRsignalingPathway
VAV3	1	1p13.3	TCRsignalingPathway
PAK4	19	19q13.2	TCRsignalingPathway
NFKBIB	19	19q13.2	TCRsignalingPathway
AKT2	19	19q13.2	TCRsignalingPathway
CBLC	19	19q13.32	TCRsignalingPathway
BMP8A	1	1p34.3	TGFb_Family_Member
BMP8B	1	1p34.2	TGFb_Family_Member
TGFB1	19	19q13.2	TGFb_Family_Member
TGFBR3	1	1p22.1	TGFb_Family_Member_Receptor
TNFRSF14	1	1p36.32	TNF_Family_Members_Receptors
TNFRSF18	1	1p36.33	TNF_Family_Members_Receptors
TNFRSF1B	1	1p36.22	TNF_Family_Members_Receptors
TNFRSF25	1	1p36.31	TNF_Family_Members_Receptors
TNFRSF4	1	1p36.33	TNF_Family_Members_Receptors
TNFRSF8	1	1p36.22	TNF_Family_Members_Receptors
TNFRSF9	1	1p36.23	TNF_Family_Members_Receptors
